# Supplementary material for: Genomic surveillance for multidrug-resistant or hypervirulent Klebsiella pneumoniae among United States bloodstream isolates
Source: Springer Nature journal article supplement (doi:10.1186/s12879-022-07558-1), 2022-07-07

- pKPN49\_1
- pKPN165\_1
- pTK421\_2
- pKPN23\_1
- PAL-1 and PAL-2

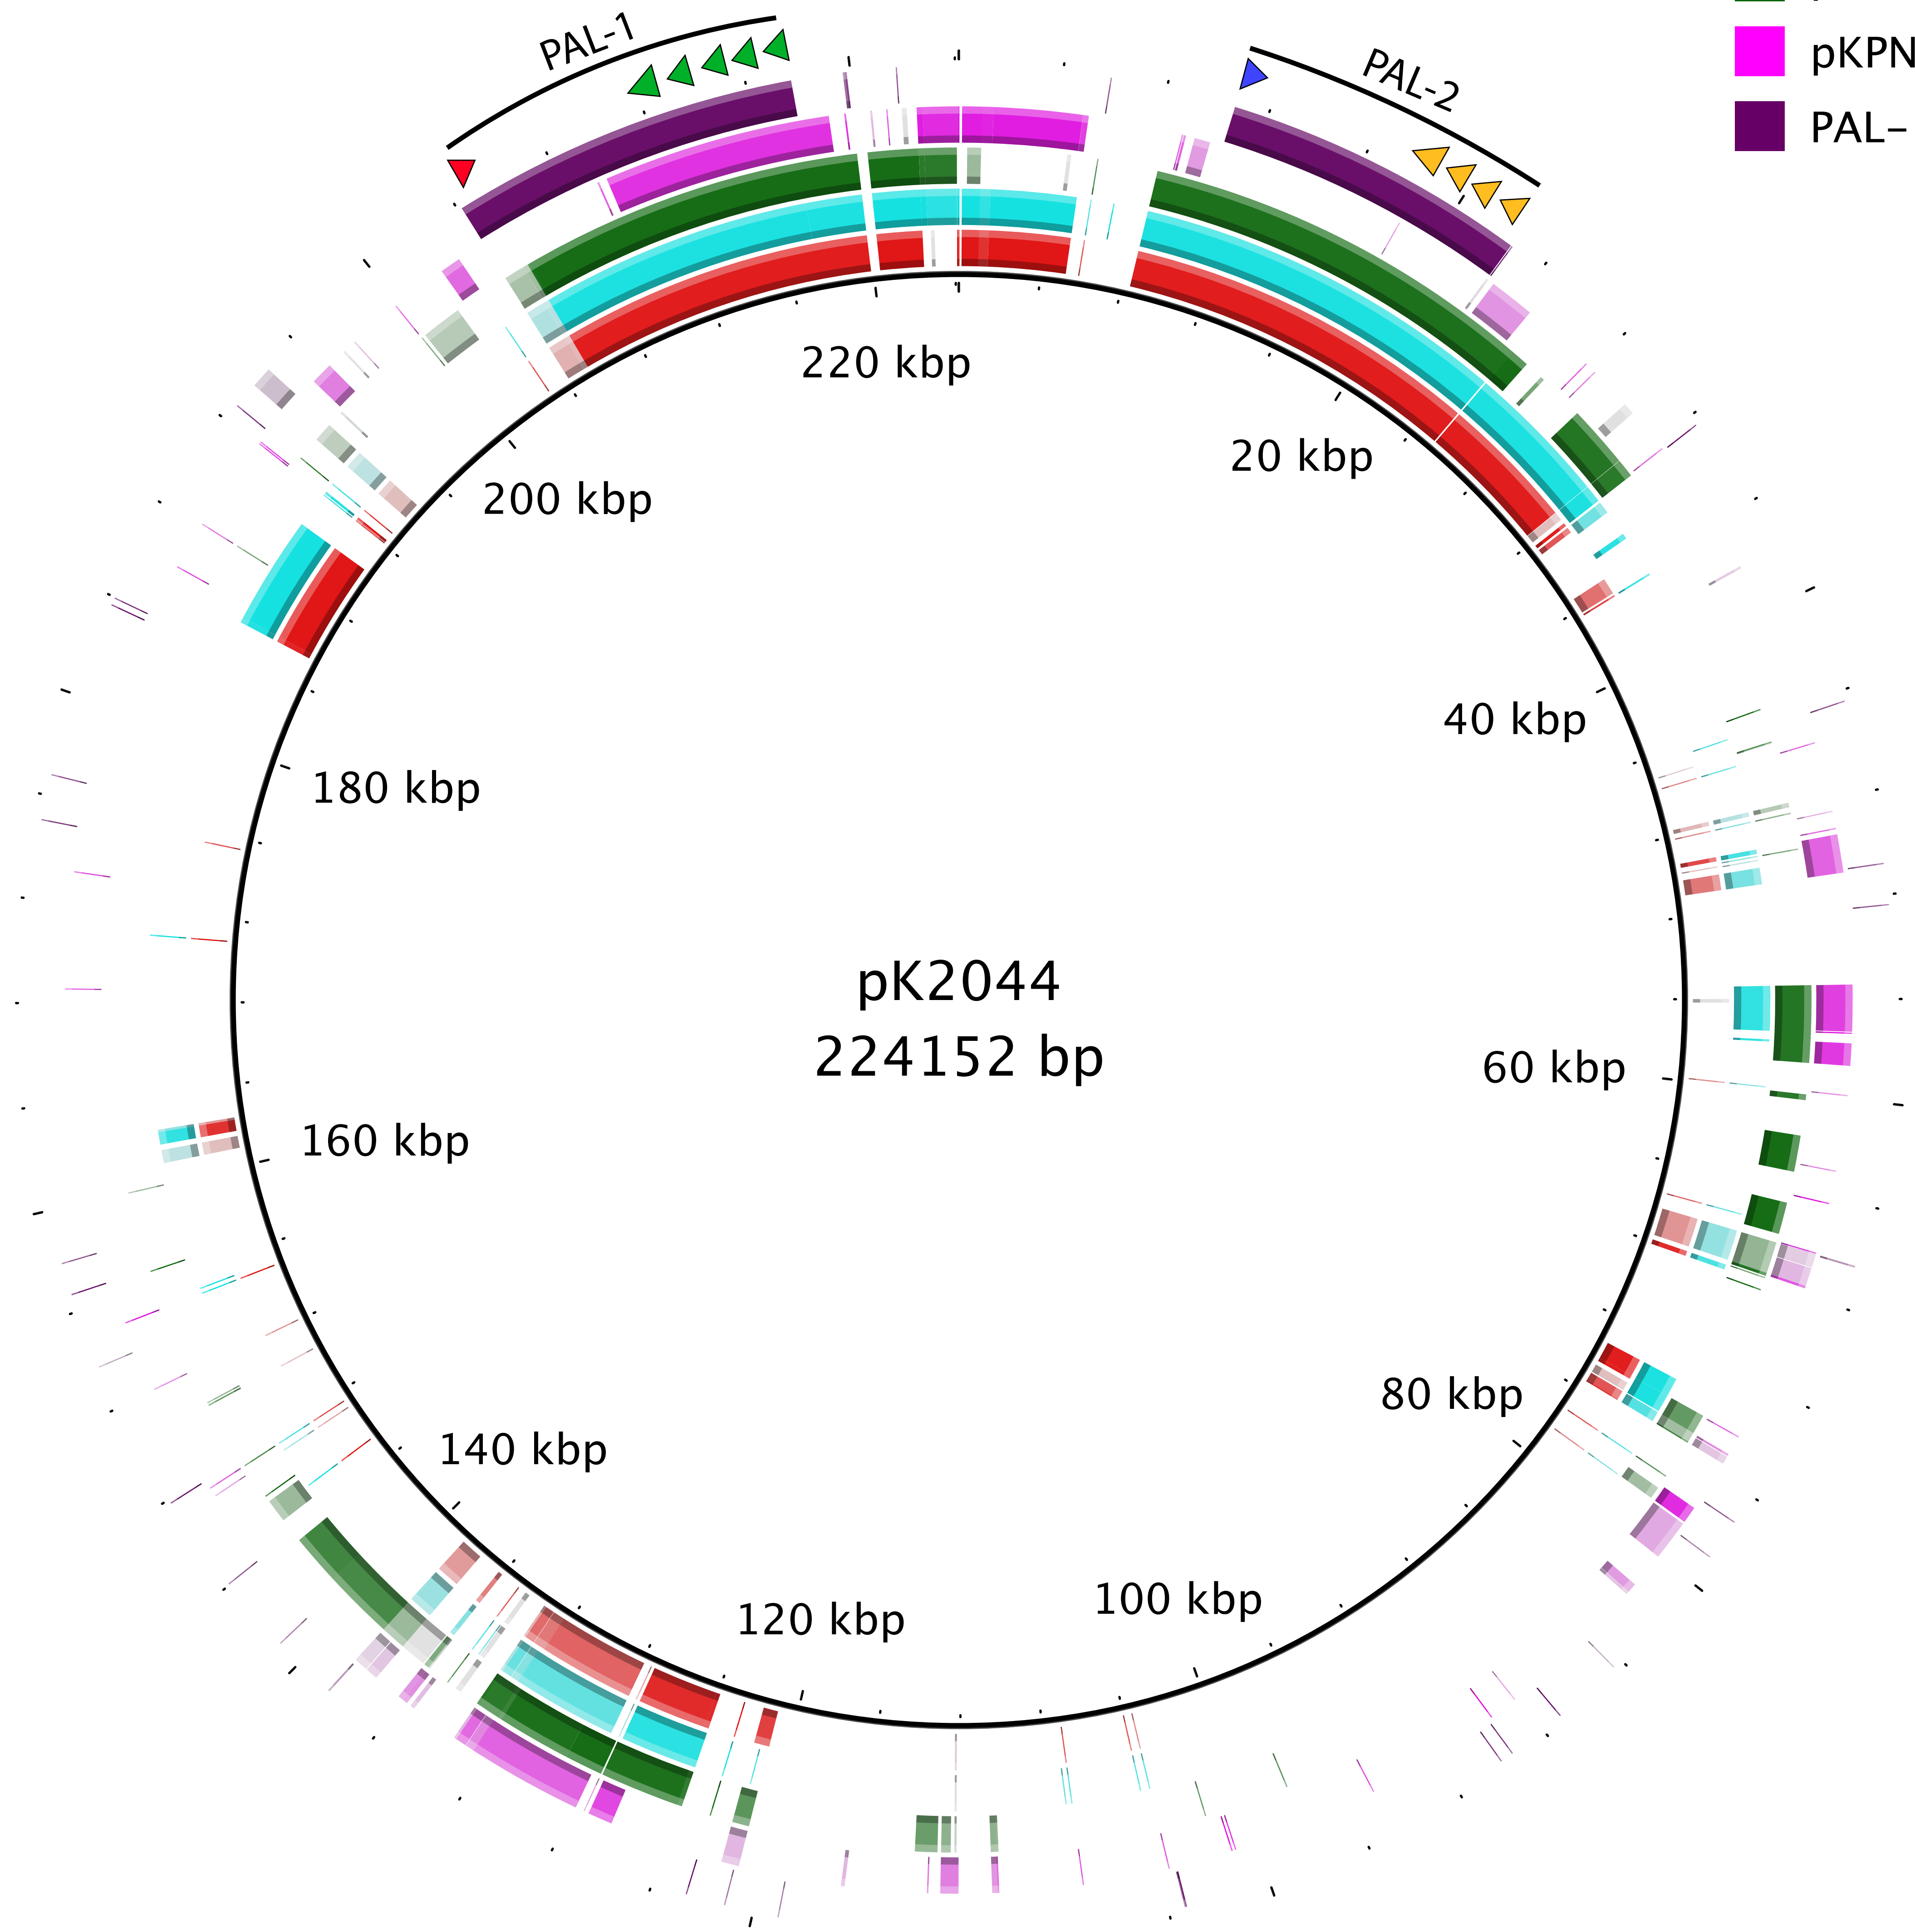

Supplement: MOESM6 [file 23248070]
