# Supplementary material for: Genomic surveillance for multidrug-resistant or hypervirulent Klebsiella pneumoniae among United States bloodstream isolates
Source: Springer Nature journal article supplement (doi:10.1186/s12879-022-07558-1), 2022-07-07

A

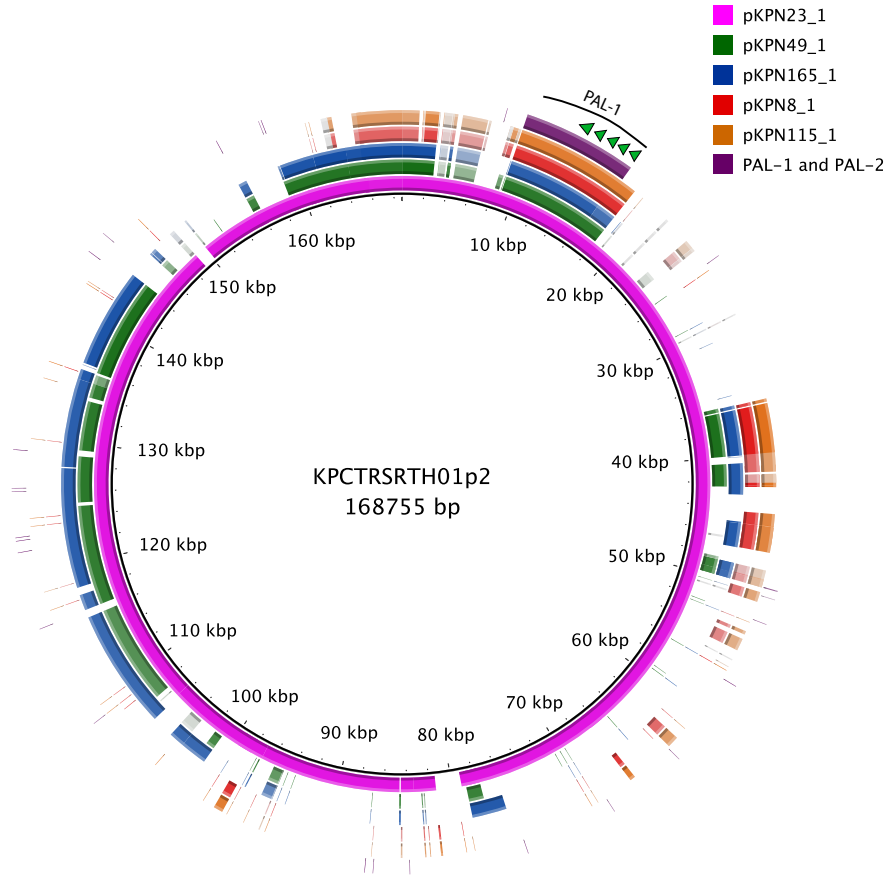

B

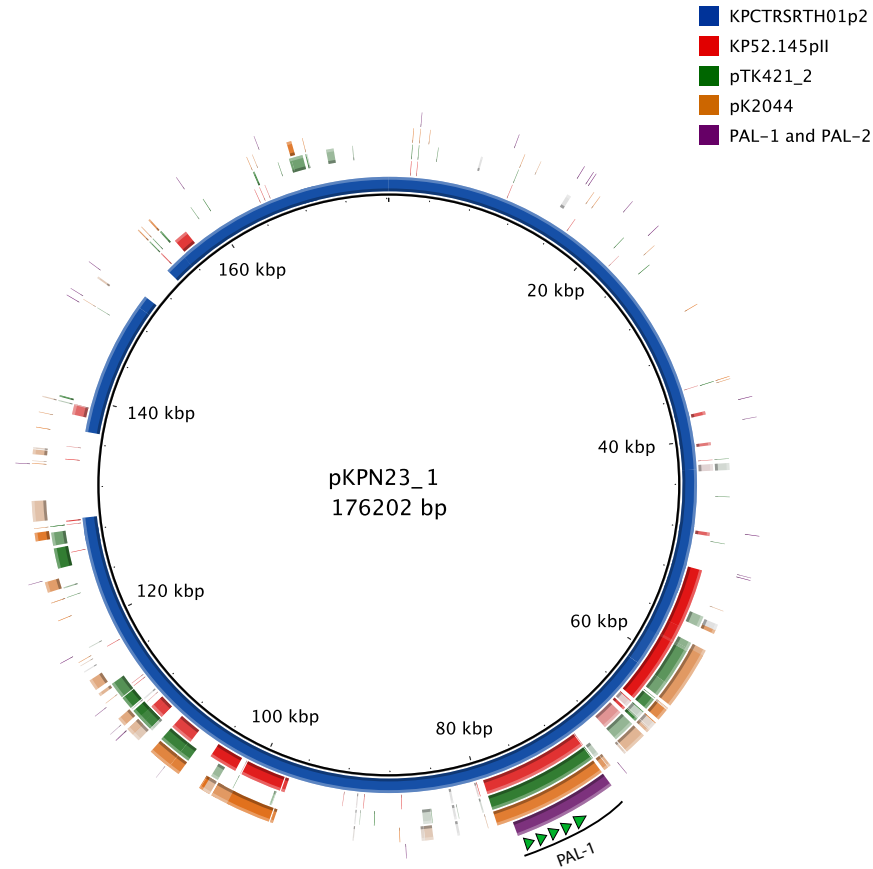

Supplement: MOESM7 [file 23248070]
