# Supplementary material for: Genomic surveillance for multidrug-resistant or hypervirulent Klebsiella pneumoniae among United States bloodstream isolates
Source: BMC Infect Dis. 2022 Jul 7;22:603. doi: 10.1186/s12879-022-07558-1 (PMC9263067; doi:10.1186/s12879-022-07558-1)
Supplement: Supplementary file 13 — Additional file 13: Table S1. Detailed characteristics of Klebsiella pneumoniae isolates. [file 12879_2022_7558_MOESM13_ESM.xlsx]

## Sheet: Sheet1
Table S1. Detailed characteristics of Klebsiella pneumoniae isolates.
Strain	Amikacin	Ampicillin	Amp/Sulbactam	Aztreonam	Cefazolin	Cefepime	Ceftriaxone	Ciprofloxacin	Gentamicin	Meropenem	Tobramycin	TMP/SMX	Pip/Tazo	String Test	Centrifugation	Tellurite Resistant	Strain	species	species_match	contig_count	N50	largest_contig	total_size	ambiguous_bases	QC_warnings	ST	virulence_score	resistance_score	num_resistance_classes	num_resistance_genes	Yersiniabactin	YbST	Colibactin	CbST	Aerobactin	AbST	Salmochelin	SmST	RmpADC	RmST	rmpA2	wzi	K_locus	K_locus_problems	K_locus_confidence	K_locus_identity	K_locus_missing_genes	O_locus	O_type
KPN100	<2 S	16 R	4 S	<1 S	<=4 S	<1 S	<1 S	<0.25 S	<=1 S	<=0.25 S	<=1 S	<=1/19 S	<4 S	-	-	-	KPN100	Klebsiella pneumoniae	strong	256	94202	243033	5784969	no	-	ST240	0	0	0	0	-	0	-	0	-	0	-	0	-	0	-	wzi115	KL54	?-	None	0.9992	KL54_06_wzc,KL54_07_wclU,KL54_08_wzx,KL54_09_wzy,KL54_10_wckB	O1v2	O1
KPN103	>64 R	>32 R	>32 R	>64 R	>=64 R	2 R	16 R	1 R	<=1 S	<0.25 S	>=16 R	>16/304 R		-	-	-	KPN103	Klebsiella pneumoniae	strong	112	299492	557663	5662533	no	-	ST14	1	0	5	8	ybt 10; ICEKp4	106	-	0	-	0	-	0	-	0	-	wzi2	KL2	none	Very high	0.9975		O1v1	O1
KPN105	<2 S	>=32 R	8 S	<1 S	<=4 S	<1 S	<1 S	<0.25 S	<=1 S	<=0.25 S	<=1 S	<=1/19 S	<=4 S	-	-	-	KPN105	Klebsiella pneumoniae	strong	61	203364	640102	5264485	no	-	ST441-1LV	1	0	0	0	ybt 13; ICEKp2	299	-	0	-	0	-	0	-	0	-	wzi149	KL62	none	Very high	0.999		O2v1	O2
KPN106	<2 S	>=32 R	8 S	<1 S	<=4 S	<1 S	<1 S	<0.25 S	<=1 S	<=0.25 S	<=1 S	<=1/19 S	8 S	-	-	-	KPN106	Klebsiella pneumoniae	strong	88	230040	580791	5508051	no	-	ST433	0	0	0	0	-	0	-	0	-	0	-	0	-	0	-	wzi173	KL102	none	Very high	0.9998		O2v2	O2
KPN115	<2 S	>=32 R	4 S	<1 S	<=4 S	<1 S	<1 S	<0.25 S	<=1 S	<=0.25 S	<=1 S	<=1/19 S		+	+	+	KPN115	Klebsiella pneumoniae	strong	111	144640	373354	5438438	no	-	ST23	3	0	0	0	-	0	-	0	iuc 1	1	iro 1	2	rmp 1; KpVP-1	26	rmpA2_3*-47%	wzi1	KL1	none	Very high	0.9999		O1v2	O1
KPN116	<2 S	>=32 R	16 I	<1 S	<=4 S	<1 S	<1 S	<0.25 S	<=1 S	<=0.25 S	<=1 S	<=1/19 S	8 S	-	-	-	KPN116	Klebsiella pneumoniae	strong	52	348402	642058	5298076	no	-	ST788	0	0	1	1	-	0	-	0	-	0	-	0	-	0	-	wzi39	KL39	none	Very high	0.9958		O3b	O3b
KPN118	<=2 S	16 R	4 S	<=1 S	<=4 S	<=1 S	<=1 S	<=0.25 S	<=1 S	<=0.25 S	<=1 S	<=1/19 S	<=4 S	-	+	+	KPN118	Klebsiella pneumoniae	strong	75	200913	562544	5599246	no	-	ST29	0	0	0	0	-	0	-	0	-	0	-	0	-	0	-	wzi115	KL54	none	Very high	0.9993		O1/O2v2	unknown
KPN119	<=2 S	16 R	4 S	<=1 S	<=4 S	<=1 S	<=1 S	<=0.25 S	<=1 S	<=0.25 S	<=1 S	<=1/19 S	<=4 S	-	-	-	KPN119	Klebsiella pneumoniae	strong	846	35191	177914	6177164	no	-	ST218-2LV	0	0	0	0	-	0	-	0	-	0	-	0	-	0	-	-	KL38	?-+	Good	0.9821	KL38_02_cpsACP,KL38_15,KL38_17_ugd	O1v1	O1
KPN120	<=2 S	16 R	<=2 S	<=1 S	<=4 S	<=1 S	<=1 S	<=0.25 S	<=1 S	<=0.25 S	<=1 S	<=1/19 S	<=4 S	-	-	-	KPN120	Klebsiella pneumoniae	strong	186	148190	380501	5432765	no	-	ST540-1LV	0	0	0	0	-	0	-	0	-	0	-	0	-	0	-	wzi281	KL38	none	Very high	0.9938		O1v1	O1
KPN121	<=2 S	>=32 R	4 S	<=1 S	<=4 S	<=1 S	<=1 S	<=0.25 S	<=1 S	<=0.25 S	<=1 S	>=16/304 R		+	-	-	KPN121	Klebsiella pneumoniae	strong	82	351148	670528	5594103	yes (1)	ambiguous_bases	ST1362	0	0	4	4	-	0	-	0	-	0	-	0	-	0	-	wzi50	KL15	none	Very high	0.9988		O4	O4
KPN123	<=2 S	>=32 R	8 S	<=1 S	<=4 S	<=1 S	<=1 S	<=0.25 S	<=1 S	<=0.25 S	<=1 S	<=1/19 S	8 S	-	-	-	KPN123	Klebsiella pneumoniae	strong	182	101740	265147	5510140	no	-	ST296-2LV	0	0	0	0	-	0	-	0	-	0	-	0	-	0	-	wzi39	KL107	?-+*	None	0.8351	KL107_05_wzb,KL107_06_wzc,KL107_08,KL107_09,KL107_10,KL107_12,KL107_15	OL102	OL102
KPN125	<=2 S	>=32 R	4 S	<=1 S	<=4 S	<=1 S	<=1 S	<=0.25 S	<=1 S	<=0.25 S	<=1 S	<=1/19 S	<=4 S	-	-	-	KPN125	Klebsiella pneumoniae	strong	77	205705	465614	5410744	no	-	ST2670	0	0	0	0	-	0	-	0	-	0	-	0	-	0	-	-	KL125	*	High	0.9028		O3b	O3b
KPN126	<=2 S	>=32 R	4 S	<=1 S	<=4 S	<=1 S	<=1 S	<=0.25 S	<=1 S	<=0.25 S	<=1 S	<=1/19 S	<=4 S	-	-	-	KPN126	Klebsiella pneumoniae	strong	99	258528	589000	5612359	no	-	ST3645-1LV	1	0	0	0	ybt 4; plasmid	221-3LV	-	0	-	0	-	0	-	0	-	-	KL126	none	Very high	0.9947		OL101	OL101
KPN127	<=2 S	16 R	4 S	<=1 S	<=4 S	<=1 S	<=1 S	<=0.25 S	<=1 S	<=0.25 S	<=1 S	<=1/19 S	<=4 S	-	+	-	KPN127	Klebsiella pneumoniae	strong	67	177640	637095	5336083	no	-	ST234	2	0	0	0	ybt 17; ICEKp10	269	clb 3	19	-	0	-	0	-	0	-	wzi114	KL30	*	Very high	0.9636		O1v2	O1
KPN128	<=2 S	<=2 R	<=2 S	<=1 S	<=4 S	<=1 S	<=1 S	<=0.25 S	<=1 S	<=0.25 S	<=1 S	>=16/304 R	<=4 S	-	-	-	KPN128	Klebsiella pneumoniae	strong	74	291894	640574	5459228	no	-	ST76	0	0	5	5	-	0	-	0	-	0	-	0	-	0	-	-	KL10	none	Very high	0.9676		O3/O3a	O3/O3a
KPN130	<=2 S	>=32 R	8 S	<=1 S	<=4 S	<=1 S	<=1 S	<=0.25 S	<=1 S	<=0.25 S	<=1 S	>=16/304 R	<=4 S	-	-	-	KPN130	Klebsiella pneumoniae	strong	88	217071	525038	5323501	no	-	ST278	0	0	2	2	-	0	-	0	-	0	-	0	-	0	-	wzi123	KL136	none	Very high	0.9965		O2v2	O2
KPN131	<=2 S	>= 32 R	4 S	<=1 S	<=4 S	<=1 S	<=1 S	<=0.25 S	<=1 S	<=0.25 S	<=1 S	<=1/19 S	<=4 S	-	-	-	KPN131	Klebsiella pneumoniae	strong	86	265521	529636	5501228	no	-	ST17	0	0	0	0	-	0	-	0	-	0	-	0	-	0	-	wzi113	KL111	none	Very high	0.9988		O3b	O3b
KPN133	<=2 S	>=32 R	8 S	<=1 S	<=4 S	<=1 S	<=1 S	<=0.25 S	<=1 S	<=0.25 S	<=1 S	<=1/19 S	<=4 S	-	-	-	KPN133	Klebsiella pneumoniae	strong	99	198765	539150	5443535	no	-	ST3640	0	0	0	0	-	0	-	0	-	0	-	0	-	0	-	-	KL64	none	Very high	0.9912		O1v1	O1
KPN134	<=2 S	>= 32 R	4 S	<=1 S	<=4 S	<=1 S	<=1 S	<=0.25 S	<=1 S	<=0.25 S	<=1 S	<=1/19 S		+	+	-	KPN134	Klebsiella pneumoniae	strong	93	234758	521271	5377262	no	-	ST397	0	0	0	0	-	0	-	0	-	0	-	0	-	0	-	wzi475	KL158	-	High	0.9971	KL158_13_cysE	O1v1	O1
KPN135	<=2 S	>= 32 R	8 S	<=1 S	<=4 S	<=1 S	<=1 S	<=0.25 S	<=1 S	<=0.25 S	<=1 S	<=1/19 S	8 S	-	-	-	KPN135	Klebsiella pneumoniae	strong	71	291737	750376	5440273	no	-	ST152	0	0	0	0	-	0	-	0	-	0	-	0	-	0	-	-	KL46	none	Very high	0.9911		O3b	O3b
KPN137	<=2 S	>= 32 R	>=32 R	<=1 S	<=4 S	<=1 S	<=1 S	<=0.25 S	<=1 S	<=0.25 S	<=1 S	<=1/19 S	8 S	-	-	-	KPN137	Klebsiella pneumoniae	strong	86	179604	319442	5440733	no	-	ST45	1	0	0	0	ybt 10; ICEKp4	78-1LV	-	0	-	0	-	0	-	0	-	wzi101	KL24	?-	Good	0.99	KL24_13_wcuG	O2v1	O2
KPN138	<=2 S	>= 32 R	4 S	<=1 S	<=4 S	<=1 S	<=1 S	<=0.25 S	<=1 S	<=0.25 S	<=1 S	<=1/19 S		-	-	-	KPN138	Klebsiella pneumoniae	strong	79	203779	528839	5357320	no	-	ST105	1	0	0	0	ybt 14; ICEKp5	151-1LV	-	0	-	0	-	0	-	0	-	wzi383	KL102	none	Very high	0.9925		O2v2	O2
KPN139	<=2 S	>=32 R	4 S	<=1 S	<=4 S	<=1 S	<=1 S	<=0.25 S	<=1 S	<=0.25 S	<=1 S	<=1/19 S	<=4 S	-	-	-	KPN139	Klebsiella pneumoniae	strong	194	114999	329180	5595683	no	-	ST252	0	0	0	0	-	0	-	0	-	0	-	0	-	0	-	wzi81	KL81	none	Very high	1		O2v2	O2
KPN140	<=2 S	16 R	4 S	<=1 S	<=4 S	<=1 S	<=1 S	<=0.25 S	<=1 S	<=0.25 S	<=1 S	<=1/19 S	<=4 S	-	-	-	KPN140	Klebsiella pneumoniae	strong	113	302907	701175	5302109	no	-	ST1271	0	0	2	4	-	0	-	0	-	0	-	0	-	0	-	wzi84	KL28	none	Very high	0.9901		O1v2	O1
KPN141	<=2 S	16 R	4 S	<=1 S	<=4 S	<=1 S	<=1 S	<=0.25 S	<=1 S	<=0.25 S	<=1 S	<=1/19 S	<=4 S	+	+	+	KPN141	Klebsiella pneumoniae	strong	74	181774	508907	5506991	no	-	ST29	1	0	0	0	ybt 9; ICEKp3	183-2LV	-	0	-	0	-	0	-	0	-	wzi115	KL54	none	Very high	0.9994		O1v2	O1
KPN143	<=2 S	>=32 R	16 I	<=1 S	<=4 S	<=1 S	<=1 S	<=0.25 S	<=1 S	<=0.25 S	<=1 S	<=1/19 S	<=4 S	-	-	-	KPN143	Klebsiella pneumoniae	strong	59	306238	933110	5191939	no	-	ST485	0	0	1	1	-	0	-	0	-	0	-	0	-	0	-	wzi219	KL25	-	High	0.9913	KL25_09_wfeD	O5	O5
KPN144	<=2 S	>=32 R	4 S	<=1 S	<=4 S	<=1 S	<=1 S	<=0.25 S	<=1 S	<=0.25 S	<=1 S	<=1/19 S	<=4 S	-	-	-	KPN144	Klebsiella pneumoniae	strong	65	271558	559606	5322263	no	-	ST192	0	0	0	0	-	0	-	0	-	0	-	0	-	0	-	wzi113	KL111	none	Very high	0.9994		O3b	O3b
KPN145	<=2 S	>= 32 R	4 S	<=1 S	<=4 S	<=1 S	<=1 S	<=0.25 S	<=1 S	<=0.25 S	<=1 S	<=1/19 S	<=4 S	-	-	-	KPN145	Klebsiella pneumoniae	strong	72	202382	539629	5282110	no	-	ST3639	0	0	0	0	-	0	-	0	-	0	-	0	-	0	-	wzi385	KL22	-+	Good	0.9924	KL22_17	O3/O3a	O3/O3a
KPN146	<=2 S	16 R	4 S	<=1 S	<=4 S	<=1 S	<=1 S	<=0.25 S	<=1 S	<=0.25 S	<=1 S	<=1/19 S	<=4 S	-	-	-	KPN146	Klebsiella pneumoniae	strong	134	153845	448965	5496949	no	-	ST483	0	0	2	3	-	0	-	0	-	0	-	0	-	0	-	wzi346	KL110	?-	Good	0.9909	KL110_18_manC	O3b	O3b
KPN148	<=2 S	>= 32 R	>=32 R	<=1 S	<=4 S	<=1 S	<=1 S	<=0.25 S	<=1 S	<=0.25 S	<=1 S	<=1/19 S	8 S	-	-	-	KPN148	Klebsiella pneumoniae	strong	99	179235	758154	5481233	no	-	ST34	0	0	1	1	-	0	-	0	-	0	-	0	-	0	-	wzi50	KL15	none	Very high	0.9989		O4	O4
KPN149	<=2 S	>= 32 R	4 S	<=1 S	<=4 S	<=1 S	<=1 S	<=0.25 S	<=1 S	<=0.25 S	<=1 S	<=1/19 S	<=4 S	-	-	-	KPN149	Klebsiella pneumoniae	strong	77	177606	416208	5396498	no	-	ST106-1LV	0	0	0	0	-	0	-	0	-	0	-	0	-	0	-	-	KL16	?-	Good	0.9938	KL16_08_wzy	O1v1	O1
KPN150	<=2 S	16 R	4 S	<=1 S	<=4 S	<=1 S	<=1 S	<=0.25 S	<=1 S	<=0.25 S	<=1 S	<=1/19 S	<=4 S	-	-	-	KPN150	Klebsiella pneumoniae	strong	62	298924	677944	5466339	no	-	ST3991	1	0	0	0	ybt 4; plasmid	65	-	0	-	0	-	0	-	0	-	wzi421	KL22	-	Good	0.9905	KL22_17	O2v2	O2
KPN152	<=2 S	>=32 R	8 S	<=1 S	<=4 S	<=1 S	<=1 S	<=0.25 S	<=1 S	<=0.25 S	<=1 S	<=1/19 S	<=4 S	-	-	-	KPN152	Klebsiella pneumoniae	strong	151	94435	225944	5335903	no	-	ST2278	0	0	0	0	-	0	-	0	-	0	-	0	-	0	-	wzi162	KL122	none	Very high	0.9996		O1v2	O1
KPN154	<=2 S	>=32 R	4 S	<=1 S	<=4 S	<=1 S	<=1 S	<=0.25 S	<=1 S	<=0.25 S	<=1 S	<=1/19 S	<=4 S	-	-	-	KPN154	Klebsiella pneumoniae	strong	124	189823	642175	5498534	no	-	ST1805-1LV	0	0	0	0	-	0	-	0	-	0	-	0	-	0	-	wzi373	KL140	none	Very high	0.9999		O1v2	O1
KPN155	<=2 S	16 R	4 S	<=1 S	<=4 S	<=1 S	<=1 S	<=0.25 S	<=1 S	<=0.25 S	<=1 S	<=1/19 S	<=4 S	-	-	-	KPN155	Klebsiella pneumoniae	strong	71	267379	1290896	5458826	no	-	ST924	0	0	0	0	-	0	-	0	-	0	-	0	-	0	-	wzi84	KL28	none	Very high	0.9917		O1v2	O1
KPN156	<=2 S	>=32 R	4 S	<=1 S	<=4 S	<=1 S	<=1 S	<=0.25 S	<=1 S	<=0.25 S	<=1 S	<=1/19 S	<=4 S	-	-	-	KPN156	Klebsiella pneumoniae	strong	72	257526	664036	5458235	no	-	ST45	1	0	0	0	ybt 10; ICEKp4	78-1LV	-	0	-	0	-	0	-	0	-	wzi5	KL5	*	Very high	0.992		O3b	O3b
KPN157	<=2 S	>=32 R	>=32 R	<=1 S	>=64 R	<=1 S	<=1 S	<=0.25 S	<=1 S	<=0.25 S	<=1 S	>=16/304 R	>=128 R	-	-	-	KPN157	Klebsiella pneumoniae	strong	133	172810	673404	5467975	no	-	ST147	0	0	6	7	-	0	-	0	-	0	-	0	-	0	-	wzi386	KL169	?	Good	0.9992		OL104	OL104
KPN158	<=2 S	16 R	4 S	<=1 S	<=4 S	<=1 S	<=1 S	<=0.25 S	<=1 S	<=0.25 S	<=1 S	<=1/19 S	<=4 S	-	-	-	KPN158	Klebsiella pneumoniae	strong	39	364820	1376545	5200607	no	-	ST19-1LV	0	0	0	0	-	0	-	0	-	0	-	0	-	0	-	wzi84	KL28	none	Very high	0.9917		O1v2	O1
KPN161	<=2 S	>=32 R	8 S	<=1 S	<=4 S	<=1 S	<=1 S	<=0.25 S	<=1 S	<=0.25 S	<=1 S	<=1/19 S	<=4 S	-	-	-	KPN161	Klebsiella pneumoniae	strong	106	191119	534904	5497824	no	-	ST37	0	0	0	0	-	0	-	0	-	0	-	0	-	0	-	wzi123	KL136	none	Very high	0.9989		O2v2	O2
KPN162	<=2 S	>=32 R	4 S	<=1 S	<=4 S	<=1 S	<=1 S	<=0.25 S	<=1 S	<=0.25 S	<=1 S	<=1/19 S	<=4 S	-	-	-	KPN162	Klebsiella pneumoniae	strong	81	244014	572099	5330504	no	-	ST134	0	0	0	0	-	0	-	0	-	0	-	0	-	0	-	wzi168	KL25	-	High	0.9826	KL25_09_wfeD	O5	O5
KPN165	<=2 S	>= 32 R	4 S	<=1 S	<=4 S	<=1 S	<=1 S	<=0.25 S	<=1 S	<=0.25 S	<=1 S	<=1/19 S	8 S	+	+	-	KPN165	Klebsiella pneumoniae	strong	78	258356	382562	5411478	no	-	ST380	4	0	0	0	ybt 14; ICEKp12	143	-	0	iuc 2	14-1LV	iro 2	12	rmp 2; KpVP-2	7	-	wzi203	KL2	-	High	0.9974	KL2_13	O1v1	O1
KPN167	<=2 S	16 R	4 S	<=1 S	<=4 S	<=1 S	<=1 S	<=0.25 S	<=1 S	<=0.25 S	<=1 S	<=1/19 S	<=4 S	-	-	-	KPN167	Klebsiella pneumoniae	strong	100	200194	578965	5554225	no	-	ST846	0	0	0	0	-	0	-	0	-	0	-	0	-	0	-	-	KL110	none	Very high	0.9941		O3b	O3b
KPN17	<=2 S	>= 32 R	16 I	<=1 S	<=4 S	<=1 S	<=1 S	<=0.25 S	<=1 S	<=0.25 S	<=1 S	<=1/19 S	16 S	-	-	-	KPN17	Klebsiella pneumoniae	strong	102	201096	915110	5431740	no	-	ST17	1	0	0	0	ybt 15; ICEKp11	231-1LV	-	0	-	0	-	0	-	0	-	wzi141	KL25	-	High	0.9916	KL25_09_wfeD	O5	O5
KPN170	<=2 S	>=32 R	16 I	<=1 S	<=4 S	<=1 S	<=1 S	<=0.25 S	<=1 S	<=0.25 S	<=1 S	>=16/304 R	<=4 S	-	+	-	KPN170	Klebsiella pneumoniae	strong	75	247421	454390	5552936	no	-	ST198	1	0	6	7	ybt unknown	0	-	0	-	0	-	0	-	0	-	-	KL30	-+*	Good	0.9645	KL30_15_wcuG	O1v1	O1
KPN172	<=2 S	>=32 R	16 I	<=1 S	<=4 S	<=1 S	<=1 S	<=0.25 S	<=1 S	<=0.25 S	<=1 S	<=1/19 S	32 I	-	-	-	KPN172	Klebsiella pneumoniae	strong	153	136064	398031	5443307	no	-	ST1380	0	0	0	0	-	0	-	0	-	0	-	0	-	0	-	wzi367	KL133	*	Very high	0.9859		O1v1	O1
KPN173	<=2 S	>=32 R	4 S	<=1 S	<=4 S	<=1 S	<=1 S	<=0.25 S	<=1 S	<=0.25 S	<=1 S	<=1/19 S	<=4 S	-	-	-	KPN173	Klebsiella pneumoniae	strong	92	206640	549447	5449854	no	-	ST753	0	0	0	0	-	0	-	0	-	0	-	0	-	0	-	-	KL3	none	Very high	0.9959		O2v2	O2
KPN174	<=2 S	>=32 R	4 S	<=1 S	<=4 S	<=1 S	<=1 S	<=0.25 S	<=1 S	<=0.25 S	<=1 S	<=1/19 S	<=4 S	-	-	-	KPN174	Klebsiella pneumoniae	strong	112	175801	399485	5491681	no	-	ST634	0	0	0	0	-	0	-	0	-	0	-	0	-	0	-	wzi281	KL38	none	Very high	0.9964		O3b	O3b
KPN175	<=2 S	>=32 R	4 S	<=1 S	<=4 S	<=1 S	<=1 S	<=0.25 S	<=1 S	<=0.25 S	<=1 S	<=1/19 S		-	-	-	KPN175	Klebsiella pneumoniae	strong	76	192037	380189	5489247	no	-	ST466	1	0	0	0	ybt 10; ICEKp4	95-1LV	-	0	-	0	-	0	-	0	-	wzi37	KL22	none	Very high	0.9949		O1v1	O1
KPN176	<=2 S	16 R	<=2 S	<=1 S	<=4 S	<=1 S	<=1 S	<=0.25 S	<=1 S	<=0.25 S	<=1 S	<=1/19 S	<=4 S	-	-	-	KPN176	Klebsiella pneumoniae	strong	103	213967	759836	5582996	no	-	ST901	0	0	0	0	-	0	-	0	-	0	-	0	-	0	-	wzi59	KL3	-	High	0.9958	KL3_14	O2v2	O2
KPN177	<=2 S	>=32 R	4 S	<=1 S	<=4 S	<=1 S	<=1 S	<=0.25 S	<=1 S	<=0.25 S	<=1 S	<=1/19 S	<=4 S	-	-	-	KPN177	Klebsiella pneumoniae	strong	90	174694	473507	5336385	no	-	ST1962	1	0	0	0	ybt 4; plasmid	37-2LV	-	0	-	0	-	0	-	0	-	wzi468	KL14	none	Very high	0.9957		O3b	O3b
KPN21	<=2 S	16 R	4 S	<=1 S	<=4 S	<=1 S	<=1 S	<=0.25 S	<=1 S	<=0.25 S	<=1 S	<=1/19 S	<=4 S	-	-	-	KPN21	Klebsiella pneumoniae	strong	97	384763	917195	5189653	no	-	ST29	0	0	0	0	-	0	-	0	-	0	-	0	-	0	-	wzi85	KL30	-*	High	0.9656	KL30_15_wcuG	O1v2	O1
KPN22	<=2 S	>=32 R	4 S	<=1 S	<=4 S	<=1 S	<=1 S	<=0.25 S	<=1 S	<=0.25 S	<=1 S	<=1/19 S	<=4 S	-	-	-	KPN22	Klebsiella pneumoniae	strong	177	221243	621776	5622961	yes (1)	ambiguous_bases	ST4430-1LV	0	0	0	0	-	0	-	0	-	0	-	0	-	0	-	wzi316	KL6	none	Very high	0.9979		O2v1	O2
KPN23	<=2 S	>=32 R	4 S	<=1 S	<=4 S	<=1 S	<=1 S	<=0.25 S	<=1 S	<=0.25 S	<=1 S	<=1/19 S	<=4 S	-	-	-	KPN23	Klebsiella pneumoniae	strong	83	178231	561922	5508213	no	-	ST881	4	0	1	1	ybt 16; ICEKp12	277-4LV	-	0	iuc 3	13-2LV	-	0	-	0	-	wzi72	KL2	none	Very high	0.9841		O1v2	O1
KPN24	<=2 S	>=32 R	4 S	<=1 S	<=4 S	<=1 S	<=1 S	<=0.25 S	<=1 S	<=0.25 S	<=1 S	<=1/19 S	<=4 S	-	-	-	KPN24	Klebsiella pneumoniae	strong	187	209328	578099	5598489	yes (1)	ambiguous_bases	ST327	0	0	0	0	-	0	-	0	-	0	-	0	-	0	-	wzi374	KL140	?	Good	0.9969		O1v2	O1
KPN25	<=2 S	>=32 R	>=32 R	<=1 S	<=4 S	<=1 S	<=1 S	<=0.25 S	<=1 S	<=0.25 S	<=1 S	<=1/19 S	32 I	-	-	-	KPN25	Klebsiella pneumoniae	strong	108	160208	452297	5623606	yes (1)	ambiguous_bases	ST45	1	0	2	2	ybt 10; ICEKp4	78	-	0	-	0	-	0	-	0	-	wzi101	KL24	none	Very high	0.9901		O2v1	O2
KPN28	<=2 S	>=32 R	>=32 R	<=1 S	<=4 S	<=1 S	<=1 S	<=0.25 S	<=1 S	<=0.25 S	<=1 S	>=16/304 R	<=4 S	-	-	-	KPN28	Klebsiella pneumoniae	strong	136	247786	973251	5567040	yes (36)	ambiguous_bases	ST36-3LV	1	0	3	3	ybt unknown	0	-	0	-	0	-	0	-	0	-	wzi27	KL27	*	Very high	0.9986		O2v2	O2
KPN30	<=2 S	>=32 R	8 S	<=1 S	<=4 S	<=1 S	<=1 S	<=0.25 S	<=1 S	<=0.25 S	<=1 S	>=16/304 R	8 S	-	-	-	KPN30	Klebsiella pneumoniae	strong	104	226968	631141	5401181	yes (1)	ambiguous_bases	ST719-1LV	0	0	1	1	-	0	-	0	-	0	-	0	-	0	-	wzi99	KL128	none	Very high	0.9997		O3b	O3b
KPN31	<=2 S	>=32 R	>=32 R	<=1 S	32 R	<=1 S	<=1 S	<=0.25 S	<=1 S	<=0.25 S	<=1 S	<=1/19 S	>=128 R	-	+	-	KPN31	Klebsiella pneumoniae	strong	96	244038	776509	5595637	no	-	ST14	0	0	0	0	-	0	-	0	-	0	-	0	-	0	-	wzi2	KL2	none	Very high	0.9975		O1v1	O1
KPN36	<=2 S	16 R	4 S	<=1 S	<=4 S	<=1 S	<=1 S	<=0.25 S	<=1 S	<=0.25 S	<=1 S	<=1/19 S	<=4 S	-	-	-	KPN36	Klebsiella pneumoniae	strong	127	230815	450813	5556264	no	-	ST20	1	0	1	2	ybt 14; ICEKp5	135-2LV	-	0	-	0	-	0	-	0	-	wzi84	KL28	none	Very high	0.9917		O1v2	O1
KPN37	<=2 S	>=32 R	>=32 R	<=1 S	16 I	<=1 S	<=1 S	<=0.25 S	<=1 S	<=0.25 S	<=1 S	>=16/304 R	>=128 R	-	-	-	KPN37	Klebsiella pneumoniae	strong	132	139366	314901	5555305	no	-	ST45	1	0	4	4	ybt 10; ICEKp4	78-1LV	-	0	-	0	-	0	-	0	-	wzi101	KL24	none	Very high	0.9902		O2v1	O2
KPN39	<=2 S	16 R	4 S	<=1 S	<=4 S	<=1 S	<=1 S	>=4 R	<=1 S	<=0.25 S	<=1 S	>=16/304 R	8 S	-	-	-	KPN39	Klebsiella pneumoniae	strong	107	148512	361974	5269103	no	-	ST15	0	0	7	8	-	0	-	0	-	0	-	0	-	0	-	wzi350	KL113	*	Very high	0.9651		O1v2	O1
KPN40	<=2 S	>= 32 R	>=32 R	<=1 S	<=4 S	<=1 S	<=1 S	<=0.25 S	<=1 S	<=0.25 S	<=1 S	<=1/19 S	16 S	-	-	-	KPN40	Klebsiella pneumoniae	strong	238	96131	301969	5811540	no	-	ST461-1LV	0	0	0	0	-	0	-	0	-	0	-	0	-	0	-	wzi123	KL136	none	Very high	0.9997		O1v2	O1
KPN41	<=2 S	>= 32 R	>=32 R	<=1 S	<=4 S	<=1 S	<=1 S	<=0.25 S	<=1 S	<=0.25 S	<=1 S	<=1/19 S		-	-	-	KPN41	Klebsiella pneumoniae	strong	129	173990	369697	5443210	no	-	ST45	1	0	0	0	ybt 10; ICEKp4	78-1LV	-	0	-	0	-	0	-	0	-	wzi101	KL24	?-	Good	0.9902	KL24_13_wcuG	O2v1	O2
KPN42	<=2 S	>= 32 R	4 S	<=1 S	<=4 S	<=1 S	<=1 S	<=0.25 S	<=1 S	<=0.25 S	<=1 S	<=1/19 S	<=4 S	-	+	-	KPN42	Klebsiella pneumoniae	strong	152	238289	513824	5687318	no	-	ST17	1	0	0	0	ybt 13; ICEKp2	302-4LV	-	0	-	0	-	0	-	0	-	wzi141	KL25	-	High	0.9916	KL25_09_wfeD	O5	O5
KPN44	<=2 S	>=32 R	>=32 R	<=1 S	<=4 S	<=1 S	<=1 S	<=0.25 S	<=1 S	<=0.25 S	<=1 S	>=16/304 R		-	-	-	KPN44	Klebsiella pneumoniae	strong	128	185792	502692	5467913	no	-	ST13	1	0	3	3	ybt 10; ICEKp4	21	-	0	-	0	-	0	-	0	-	wzi40	KL3	none	Very high	0.9998		O1v2	O1
KPN45	<=2 S	>= 32 R	4 S	<=1 S	<=4 S	<=1 S	<=1 S	<=0.25 S	<=1 S	<=0.25 S	<=1 S	<=1/19 S	<=4 S	-	-	-	KPN45	Klebsiella pneumoniae	strong	130	202190	329912	5714752	no	-	ST104	0	0	0	0	-	0	-	0	-	0	-	0	-	0	-	wzi102	KL31	none	Very high	0.9911		O3b	O3b
KPN46	<=2 S	>=32 R	4 S	<=1 S	<=4 S	<=1 S	<=1 S	<=0.25 S	<=1 S	<=0.25 S	<=1 S	<=1/19 S	<=4 S	-	-	-	KPN46	Klebsiella pneumoniae	strong	3	5383093	5383093	5561828	no	-	ST466	1	0	0	0	ybt 10; ICEKp4	95	-	0	-	0	-	0	-	0	-	wzi37	KL22	-	High	0.9948	KL22_10_wfeD	O1v1	O1
KPN48	<=2 S	16 R	4 S	<=1 S	<=4 S	<=1 S	<=1 S	<=0.25 S	<=1 S	<=0.25 S	<=1 S	<=1/19 S	<=4 S	-	-	-	KPN48	Klebsiella pneumoniae	strong	110	142482	380479	5241024	no	-	ST22-2LV	0	0	0	0	-	0	-	0	-	0	-	0	-	0	-	wzi115	KL54	none	Very high	0.9996		O1v2	O1
KPN49	<=2 S	<=2 R	<=2 S	<=1 S	<=4 S	<=1 S	<=1 S	<=0.25 S	<=1 S	<=0.25 S	<=1 S	<=1/19 S	<=4 S	+	+	-	KPN49	Klebsiella pneumoniae	strong	102	156432	347271	5556228	no	-	ST66	5	0	0	0	ybt 12; ICEKp10	316	clb 1	9-1LV	iuc 2	6	iro 2	22-2LV	rmp 2; KpVP-2	2	-	wzi257	KL2	none	Very high	0.9835		O1v2	O1
KPN50	<=2 S	>=32 R	8 S	<=1 S	<=4 S	<=1 S	<=1 S	<=0.25 S	<=1 S	<=0.25 S	<=1 S	>=16/304 R	<=4 S	-	-	-	KPN50	Klebsiella pneumoniae	strong	170	124845	327776	5505743	no	-	ST37	0	0	2	2	-	0	-	0	-	0	-	0	-	0	-	wzi96	KL38	none	Very high	0.997		O3b	O3b
KPN51	S	R	R	S	S	S	S	R	S	S	R	R	S	-	-	-	KPN51	Klebsiella pneumoniae	strong	118	133569	440123	5514380	no	-	ST1015-1LV	0	0	6	6	-	0	-	0	-	0	-	0	-	0	-	wzi25	KL25	?-	Good	0.9982	KL25_08_wzy,KL25_09_wfeD	O3b	O3b
KPN53	<=2 S	>=32 R	16 I	<=1 S	<=4 S	<=1 S	<=1 S	<=0.25 S	<=1 S	<=0.25 S	<=1 S	<=1/19 S	32 I	+	+	-	KPN53	Klebsiella pneumoniae	strong	122	166618	303162	5434315	no	-	ST14	0	0	4	5	-	0	-	0	-	0	-	0	-	0	-	wzi2	KL2	none	Very high	0.9975		O1v1	O1
KPN55	<=2 S	>=32 R	4 S	<=1 S	<=4 S	<=1 S	<=1 S	<=0.25 S	<=1 S	<=0.25 S	<=1 S	<=1/19 S	<=4 S	-	-	-	KPN55	Klebsiella pneumoniae	strong	92	192605	395447	5257475	no	-	ST234	2	0	0	0	ybt 17; ICEKp10	269	clb 3	19	-	0	-	0	-	0	-	wzi114	KL30	*	Very high	0.9637		O1v2	O1
KPN73	<=2 S	>= 32 R	4 S	<=1 S	<=4 S	<=1 S	<=1 S	<=0.25 S	<=1 S	<=0.25 S	<=1 S	<=1/19 S		-	+	+	KPN73	Klebsiella pneumoniae	strong	152	138101	359447	5419434	no	-	ST111	0	0	0	0	-	0	-	0	-	0	-	0	-	0	-	wzi63	KL63	none	Very high	0.9936		O1v2	O1
KPN74	<=2 S	>=32 R	8 S	<=1 S	<=4 S	<=1 S	<=1 S	<=0.25 S	<=1 S	<=0.25 S	<=1 S	>=16/304 R	<=4 S	-	-	-	KPN74	Klebsiella pneumoniae	strong	166	135905	320621	5510035	no	-	ST464	0	0	5	6	-	0	-	0	-	0	-	0	-	0	-	wzi555	KL34	?-*	Good	0.9913	KL34_08_wcaJ	O2v2	O2
KPN8	<=2 S	>=32 R	4 S	<=1 S	<=4 S	<=1 S	<=1 S	<=0.25 S	<=1 S	<=0.25 S	<=1 S	<=1/19 S	<=4 S	+	+	+	KPN8	Klebsiella pneumoniae	strong	83	194618	930714	5546118	no	-	ST23	4	0	0	0	ybt 9; ICEKp3	15-4LV	-	0	iuc 1	1	iro 1	2	rmp 1; KpVP-1	26	-	wzi1	KL1	none	Very high	0.9997		O1v2	O1
KPN80	<2 S	16 R	8 S	<1 S	<=4 S	<1 S	<1 S	<0.25 S	<=1 S	<=0.25 S	<=1 S	<=1/19 S	<4 S	+	+	-	KPN80	Klebsiella pneumoniae	strong	202	118053	313028	5636025	no	-	ST29	0	0	0	0	-	0	-	0	-	0	-	0	-	0	-	wzi85	KL30	-+*	Good	0.9655	KL30_15_wcuG	O1v2	O1
KPN81	<=2 S	16 R	4 S	<=1 S	<=4 S	<=1 S	<=1 S	<=0.25 S	<=1 S	<=0.25 S	<=1 S	<=1/19 S	<=4 S	-	+	-	KPN81	Klebsiella pneumoniae	strong	205	96379	301833	5215320	no	-	ST29	2	0	0	0	ybt 17; ICEKp10	289-2LV	clb 3	17-1LV	-	0	-	0	-	0	-	wzi85	KL30	*	Very high	0.9656		O2v2	O2
KPN83	<2 S	8 R	<=2 S	<=1 S	<=4 S	<=1 S	<=1 S	<=0.25 S	<=1 S	<=0.25 S	<=1 S	<=1/19 S	<4 S	-	-	-	KPN83	Klebsiella pneumoniae	strong	195	152465	293259	5471174	no	-	ST422	0	0	0	0	-	0	-	0	-	0	-	0	-	0	-	wzi113	KL111	none	Very high	1		O3b	O3b
KPN84	<2 S	>=32 R	8 S	<=1 S	<=4 S	<=1 S	<=1 S	<=0.25 S	<=1 S	<=0.25 S	<=1 S	<=1/19 S	<=4 S	-	-	-	KPN84	Klebsiella pneumoniae	strong	114	146044	390218	5311916	no	-	ST17-1LV	0	0	0	0	-	0	-	0	-	0	-	0	-	0	-	wzi173	KL155	?-	Good	0.9628	KL155_18_rmlB,KL155_19_rmlA,KL155_21_rmlC	OL101	OL101
KPN85	<=2 S	>=32 R	>=32 R	<=1 S	8 R	<=1 S	<=1 S	1 S	<=1 S	<=0.25 S	<=1 S	>=16/304 R	>=128 R	-	+	-	KPN85	Klebsiella pneumoniae	strong	161	131734	367382	5494694	no	-	ST248	0	0	5	5	-	0	-	0	-	0	-	0	-	0	-	wzi50	KL51	none	Very high	0.9993		O3b	O3b
KPN87	<=2 S	>=32 R	4 S	<=1 S	<=4 S	<=1 S	<=1 S	<=0.25 S	<=1 S	<=0.25 S	<=1 S	<=1/19 S	<=4 S	-	-	-	KPN87	Klebsiella pneumoniae	strong	155	123388	331612	5499426	no	-	ST412	1	0	0	0	ybt 4; plasmid	65-1LV	-	0	-	0	-	0	-	0	-	wzi206	KL57	none	Very high	1		O3b	O3b
KPN88	>=64 R	>=32 R	>=32 R	<=1 S	32 R	<=1 S	<=1 S	>=4 R	8 I	<0.25 S	>=16 R	>16/304 R	>=128 R	-	-	-	KPN88	Klebsiella pneumoniae	strong	212	129813	300271	5682618	no	-	ST258	2	0	6	12	ybt 17; ICEKp10	258-1LV	clb 3	19-1LV	-	0	-	0	-	0	-	wzi29	KL106	?	Good	0.9998		O2v2	O2
KPN90	<=2 S	>=32 R	4 S	<=1 S	<=4 S	<=1 S	<=1 S	<=0.25 S	<=1 S	<=0.25 S	<=1 S	<=1/19 S	<=4 S	-	-	-	KPN90	Klebsiella pneumoniae	strong	80	230627	602057	5184322	no	-	ST4106	0	0	0	0	-	0	-	0	-	0	-	0	-	0	-	wzi39	KL39	none	Very high	0.9998		O3b	O3b
KPN96	<=2 S	>=32 R	16 I	<=1 S	<=4 S	<=1 S	<=1 S	<=0.25 S	>=16 R	<=0.25 S	8 I	>=16/304 R	<=4 S	-	+	-	KPN96	Klebsiella pneumoniae	strong	100	208956	648343	5444841	no	-	ST46	0	0	7	9	-	0	-	0	-	0	-	0	-	0	-	wzi64	KL64	none	Very high	0.9983		O2v1	O2
KPN97	<2 S	>=32 R	16 I	<1 S	<=4 S	<1 S	<1 S	<0.25 S	<=1 S	<=0.25 S	<=1 S	<=1/19 S	16 S	-	-	-	KPN97	Klebsiella pneumoniae	strong	114	101211	222679	5163070	no	-	ST4295	0	0	0	0	-	0	-	0	-	0	-	0	-	0	-	wzi47	KL47	?-	Good	0.9999	KL47_06_wzc,KL47_10_wcqC,KL47_12_wcuT	O1v1	O1
KPN98	<2 S	16 R	4 S	<1 S	<=4 S	<1 S	<1 S	<0.25 S	<=1 S	<=0.25 S	<=1 S	<=1/19 S	<4 S	-	-	-	KPN98	Klebsiella pneumoniae	strong	96	162755	426292	5328947	no	-	ST432	0	0	0	0	-	0	-	0	-	0	-	0	-	0	-	wzi447	KL148	?-+*	None	0.8224	KL148_05_wzb,KL148_06_wzc,KL148_07_wcaJ,KL148_08,KL148_09_wcuP,KL148_10,KL148_11,KL148_12_wbaZ,KL148_13_wzx,KL148_15_rmlB,KL148_16_rmlA,KL148_17_rmlD	OL101	OL101
KPN86	<=2 S	>=32 R	16 I	<=1 S	>=64 R	<=1 S	16 R	0.5 S	>=16 R	<=0.25 S	8 I	>=16/304 R	<=4 S	-	-	-	KPN86	Klebsiella pneumoniae	strong	131	170858	612011	5493580	no	-	ST881	0	1	7	10	-	0	-	0	-	0	-	0	-	0	-	wzi72	KL2	none	Very high	0.9841		O1v2	O1
KPN117	16 S	>=32 R	>=32 R	>=64 R	>=64 R	4 R	>=64 R	>=4 R	>=16 R	<0.25 S	>=16 R	>16/304 R		+	+	-	KPN117	Klebsiella pneumoniae	strong	86	201707	625503	5361580	no	-	ST1017	0	1	8	12	-	0	-	0	-	0	-	0	-	0	-	wzi130	KL58	?	Good	0.9997		O3b	O3b
KPN122	8 S	>=32 R	>=32 R	16 R	>=64 R	32 R	>=64 R	>=4 R	>=16 R	<0.25 S	>=16 R	>=16/304 R	>=128 R	-	-	-	KPN122	Klebsiella pneumoniae	strong	92	218768	511956	5497300	no	-	ST307	0	1	8	12	-	0	-	0	-	0	-	0	-	0	-	wzi173	KL102	none	Very high	0.9927		O2v2	O2
KPN142	8 S	>=32 R	>=32 R	>=64 R	>=64 R	2 R	>=64 R	>4 R	<=1 S	<0.25 S	>=16 R	>16/304 R	64 I	-	-	-	KPN142	Klebsiella pneumoniae	strong	81	200081	927212	5496850	no	-	ST307	0	1	8	11	-	0	-	0	-	0	-	0	-	0	-	wzi173	KL102	none	Very high	0.9927		O2v2	O2
KPN178	<=2 S	>=32 R	>=32 R	>=64 R	>=64 R	2 R	>=64 R	>=4 R	>=16 R	<=0.25 S	>=16 R	>=16/304 R	64 R	-	-	-	KPN178	Klebsiella pneumoniae	strong	104	207657	475490	5602267	no	-	ST3070	0	1	8	12	-	0	-	0	-	0	-	0	-	0	-	wzi178	KL166	none	Very high	0.9931		O3b	O3b
KPN94	16 S	>=32 R	>32 R	>64 R	>=64 R	8 R	>=64 R	>4 R	>=16 R	<0.25 S	>=16 R	>16/304 R	>=128 R	-	-	-	KPN94	Klebsiella pneumoniae	strong	207	75216	181000	5652379	no	-	ST147	1	1	10	14	ybt 10; ICEKp4	78-3LV	-	0	-	0	-	0	-	0	-	wzi420	KL10	?-	None	0.9673	KL10_07_wbaP,KL10_08_wclQ,KL10_09_wclP,KL10_15_wcsO	O3/O3a	O3/O3a
KPN99	4 S	>32 R	>32 R	16 R	>=64 R	2 R	>=64 R	1 S	>=16 R	<0.25 S	>=16 R	>16/304 R	16 S	-	-	-	KPN99	Klebsiella pneumoniae	strong	116	126222	423302	5447543	no	-	ST323	0	1	8	12	-	0	-	0	-	0	-	0	-	0	-	wzi262	KL21	?-	None	0.999	KL21_07_wcuD,KL21_08_wzy,KL21_09_wcuE,KL21_15_wzx	O3b	O3b
KPN168	S	R	I	R	R	R	R	R	S	S	I	I	I	-	-	-	KPN168	Klebsiella pneumoniae	strong	92	203756	675697	5452295	no	-	ST152	1	1	6	9	ybt 10; ICEKp4	325	-	0	-	0	-	0	-	0	-	wzi110	KL149	none	Very high	0.9998		O4	O4
KPN124	<=2 S	>=32 R	>=32 R	>=64 R	>=64 R	>=64 R	>=64 R	<=0.25 S	<=1 S	>=16 R	<=1 S	>=16/304 R	>=128 R	-	-	-	KPN124	Klebsiella pneumoniae	strong	116	161281	350816	5637760	no	-	ST45	1	2	6	6	ybt 10; ICEKp4	78	-	0	-	0	-	0	-	0	-	wzi202	KL127	?-	Good	0.9791	KL127_07_wbaP,KL127_15_rmlB	OL101	OL101
KPN132	4 S	>=32 R	>=32 R	2 R	>=64 R	32 R	>=64 R	>=4 R	>=16 R	>=16 R	>=16 R	>16/304 R	>=128 R	-	-	-	KPN132	Klebsiella pneumoniae	strong	97	206551	917000	5443241	no	-	ST147	0	2	7	14	-	0	-	0	-	0	-	0	-	0	-	wzi64	KL64	none	Very high	0.9999		O2v1	O2
KPN70	<=2 S	>=32 R	>=32 R	>=64 R	>=64 R	2 R	16 R	>=4 R	<=1 S	16 R	<=1 S	>=16/304 R	8 S	-	-	-	KPN70	Klebsiella pneumoniae	strong	201	62422	182913	5634786	no	Ambiguous_bases	ST15	2	2	8	11	ybt 17; ICEKp10	289-3LV	clb 3 (incomplete)	17-5LV	-	0	-	0	-	0	-	wzi93	KL112	?-	Good	0.9865	KL112_10_wcaO	O1v1	O1
KPN104	16 S	>=32 R	>32 R	>64 R	>=64 R	8 R	>=64 R	>4 R	<=1 S	>=16 R	8 I	>16/304 R		-	-	-	KPN104	Klebsiella pneumoniae	strong	223	129666	377446	6151439	no	-	ST258	2	2	7	10	ybt 17; ICEKp10	289-1LV	clb 3	17-1LV	-	0	-	0	-	0	-	-	KL107	none	Very high	0.9998		O2v2	O2
KPN107	<2 S	>=32 R	>32 R	>64 R	>=64 R	16 R	>=64 R	>4 R	8 I	>16 R	>16 R	>16/304 R		-	-	-	KPN107	Klebsiella pneumoniae	strong	204	130761	543927	5813260	no	-	ST258	2	2	9	13	ybt 17; ICEKp10	289	clb 3	17-3LV	-	0	-	0	-	0	-	wzi154	KL107	none	Very high	0.9999		O2v2	O2
KPN166	16 S	32 R	>=32 R	>=64 R	>=64 R	8 R	>=64 R	>=4 R	2S	>=16 R	>=16 R	>=16/304 R	>=128 R	-	-	-	KPN166	Klebsiella pneumoniae	strong	180	134034	334198	5898821	no	-	ST258	2	2	8	13	ybt 17; ICEKp10	289-1LV	clb 3	17-1LV	-	0	-	0	-	0	-	wzi154	KL107	none	Very high	0.9999		O2v2	O2
KPN18	<=2 S	>=32 R	>=32 R	>=64 R	>=64 R	>=64 R	>=64 R	>=4 R	4 S	>=16 R	8 I	>=16/304 R	>=128 R	-	-	-	KPN18	Klebsiella pneumoniae	strong	186	161220	382685	5840930	no	-	ST258	2	2	9	12	ybt 17; ICEKp10	289	clb 3	17-1LV	-	0	-	0	-	0	-	wzi154	KL107	none	Very high	0.9998		O2v2	O2
KPN35	16 S	>=32 R	>=32 R	>=64 R	>=64 R	8 R	16 R	>=4 R	>=16 R	>=16 R	>=16 R	>16/304 R	>=128 R	-	-	-	KPN35	Klebsiella pneumoniae	strong	162	130289	462739	5653773	no	-	ST258	2	3	7	9	ybt 17; ICEKp10	289-1LV	clb 3	17-2LV	-	0	-	0	-	0	-	wzi154	KL107	none	Very high	0.9999		O2v2	O2
KPN95	<2 S	>=32 R	>32 R	>64 R	>=64 R	>64 R	>=64 R	>4 R	<=1 S	>16 R	<=1 S	>=16/304 R	>128 R	-	-	-	KPN95	Klebsiella pneumoniae	strong	192	71591	156113	5615896	no	-	ST15	2	3	9	11	ybt 17; ICEKp10	289-1LV	clb 3 (incomplete)	17-5LV	-	0	-	0	-	0	-	wzi93	KL112	?-	None	0.9853	KL112_08,KL112_09_wzy,KL112_11_wcaN,KL112_13_wcuV,KL112_14_wzx	O1/O2v1	unknown
SHV-12**** For strain KPN103 Illumina assembly, SHV-12 was not detected. After hybrid assembly a SHV-12 containing plasmid was found.
Antibiotic	Intermediate MIC Breakpoint per CLSI Guidelines	Resistant MIC Breakpoint per CLSI Guidelines
Ampicillin	16	≥32
Ampicillin/Sulbactam	16/8	≥32/16
Aztreonam	8	≥16
Cefazolin	4	≥8
Cefepime	4-8*	≥16
Ceftriaxone	2	≥4
Ciprofloxacin	0.5	≥1
Gentamicin	8	≥16
Meropenem	2	≥4
Tobramycin	8	≥16
Trimethoprim/Sulfamethoxazole	N/A**	≥4/76
Piperacillin/Tazobactam	32/4-64/4	≥128/4
*Susceptible dose dependent
**No available MIC breakpoint
[truncated: 75 more columns]
