# Supplementary material for: Genomic surveillance for multidrug-resistant or hypervirulent Klebsiella pneumoniae among United States bloodstream isolates
Source: BMC Infect Dis. 2022 Jul 7;22:603. doi: 10.1186/s12879-022-07558-1 (PMC9263067; doi:10.1186/s12879-022-07558-1)
Supplement: Supplementary file 14 — Additional file 14: Table S2. Features of in silico-predicted plasmids. [file 12879_2022_7558_MOESM14_ESM.xlsx]

## Sheet: Kleborate
Table S2. Features of in silico-predicted plasmids
strain	plasmid	species	species_match	contig_count	N50	largest_contig	total_size	ambiguous_bases	QC_warnings	ST	virulence_score	resistance_score	num_resistance_classes	num_resistance_genes	Yersiniabactin	YbST	Colibactin	CbST	Aerobactin	AbST	Salmochelin	SmST	RmpADC	RmST	rmpA2	wzi	K_locus	AGly_acquired	Col_acquired	Fcyn_acquired	Flq_acquired	Gly_acquired	MLS_acquired	Phe_acquired	Rif_acquired	Sul_acquired	Tet_acquired	Tgc_acquired	Tmt_acquired	Bla_acquired	Bla_inhR_acquired	Bla_ESBL_acquired	Bla_ESBL_inhR_acquired	Bla_Carb_acquired	Bla_chr	SHV_mutations	Omp_mutations	Col_mutations	Flq_mutations
KPN124	plasmid_AA002	unknown		1	59274	59274	59274	no	-	NA	0	0	0	0	-	0	-	0	-	0	-	0	-	0	-	-	-	-	-	-	-	-	-	-	-	-	-	-	-	-	-	-	-	-	-	-	-	-	-
KPN30	plasmid_AA002	unknown		1	57418	57418	57418	no	-	NA	0	0	0	0	-	0	-	0	-	0	-	0	-	0	-	-	-	-	-	-	-	-	-	-	-	-	-	-	-	-	-	-	-	-	-	-	-	-	-
KPN45	plasmid_AA002	unknown		2	41543	41543	66993	no	-	NA	0	0	0	0	-	0	-	0	-	0	-	0	-	0	-	-	-	-	-	-	-	-	-	-	-	-	-	-	-	-	-	-	-	-	-	-	-	-	-
KPN42	plasmid_AA022	unknown		5	24783	49550	110465	no	-	NA	0	0	0	0	-	0	-	0	-	0	-	0	-	0	-	-	-	-	-	-	-	-	-	-	-	-	-	-	-	-	-	-	-	-	-	-	-	-	-
KPN43	plasmid_AA022	unknown		6	24783	49994	115825	no	-	NA	0	0	0	0	-	0	-	0	-	0	-	0	-	0	-	-	-	-	-	-	-	-	-	-	-	-	-	-	-	-	-	-	-	-	-	-	-	-	-
KPN093	plasmid_AA024	unknown		11	12894	14711	71663	no	-	NA	0	0	0	0	-	0	-	0	-	0	-	0	-	0	-	-	-	-	-	-	-	-	-	-	-	-	-	-	-	-	-	-	-	-	-	-	-	-	-
KPN100	plasmid_AA024	unknown		8	36949	36949	69406	no	-	NA	0	0	0	0	-	0	-	0	-	0	-	0	-	0	-	-	-	-	-	-	-	-	-	-	-	-	-	-	-	-	-	-	-	-	-	-	-	-	-
KPN118	plasmid_AA024	unknown		1	40710	40710	40710	no	-	NA	0	0	0	0	-	0	-	0	-	0	-	0	-	0	-	-	-	-	-	-	-	-	-	-	-	-	-	-	-	-	-	-	-	-	-	-	-	-	-
KPN128	plasmid_AA024	unknown		2	27388	27388	47365	no	-	NA	0	0	4	4	-	0	-	0	-	0	-	0	-	0	-	-	-	aadA2^	-	-	-	-	-	-	-	sul1	tet(A).v1	-	dfrA12	-	-	-	-	-	-	-	-	-	-
KPN140	plasmid_AA024	unknown		1	17307	17307	17307	no	-	NA	0	0	0	0	-	0	-	0	-	0	-	0	-	0	-	-	-	-	-	-	-	-	-	-	-	-	-	-	-	-	-	-	-	-	-	-	-	-	-
KPN124	plasmid_AA029	unknown		5	20066	32437	66718	no	-	NA	0	0	3	3	-	0	-	0	-	0	-	0	-	0	-	-	-	aadA1.v1^	-	-	-	-	-	-	-	sul1	-	-	dfrA1.v2	-	-	-	-	-	-	-	-	-	-
KPN28	plasmid_AA029	unknown		2	57571	57571	59459	no	-	NA	0	0	0	0	-	0	-	0	-	0	-	0	-	0	-	-	-	-	-	-	-	-	-	-	-	-	-	-	-	-	-	-	-	-	-	-	-	-	-
KPN37	plasmid_AA029	unknown		3	21834	28311	58010	no	-	NA	0	0	3	3	-	0	-	0	-	0	-	0	-	0	-	-	-	aadA1.v1^	-	-	-	-	-	-	-	sul1	-	-	dfrA1.v2	-	-	-	-	-	-	-	-	-	-
KPN47	plasmid_AA029	unknown		4	21834	28311	59775	no	-	NA	0	0	3	3	-	0	-	0	-	0	-	0	-	0	-	-	-	aadA1.v1^	-	-	-	-	-	-	-	sul1	-	-	dfrA1.v2	-	-	-	-	-	-	-	-	-	-
KPN50	plasmid_AA029	unknown		3	40241	40241	59208	no	-	NA	0	0	0	0	-	0	-	0	-	0	-	0	-	0	-	-	-	-	-	-	-	-	-	-	-	-	-	-	-	-	-	-	-	-	-	-	-	-	-
KPN40	plasmid_AA031	unknown		2	22966	22966	24869	no	-	NA	0	0	0	0	-	0	-	0	-	0	-	0	-	0	-	-	-	-	-	-	-	-	-	-	-	-	-	-	-	-	-	-	-	-	-	-	-	-	-
KPN098	plasmid_AA033	unknown		3	59636	59636	67888	no	-	NA	0	0	0	0	-	0	-	0	-	0	-	0	-	0	-	-	-	-	-	-	-	-	-	-	-	-	-	-	-	-	-	-	-	-	-	-	-	-	-
KPN133	plasmid_AA033	unknown		4	74167	74167	100364	no	-	NA	0	0	0	0	-	0	-	0	-	0	-	0	-	0	-	-	-	-	-	-	-	-	-	-	-	-	-	-	-	-	-	-	-	-	-	-	-	-	-
KPN141	plasmid_AA033	unknown		3	146438	146438	176883	no	-	NA	0	0	0	0	-	0	-	0	-	0	-	0	-	0	-	-	-	-	-	-	-	-	-	-	-	-	-	-	-	-	-	-	-	-	-	-	-	-	-
KPN80	plasmid_AA033	unknown		1	23977	23977	23977	no	-	NA	0	0	0	0	-	0	-	0	-	0	-	0	-	0	-	-	-	-	-	-	-	-	-	-	-	-	-	-	-	-	-	-	-	-	-	-	-	-	-
KPN123	plasmid_AA035	unknown		13	24208	40980	161026	no	-	NA	0	0	0	0	-	0	-	0	-	0	-	0	-	0	-	-	-	-	-	-	-	-	-	-	-	-	-	-	-	-	-	-	-	-	-	-	-	-	-
KPN139	plasmid_AA035	unknown		38	12133	30433	269350	no	-	NA	0	0	0	0	-	0	-	0	-	0	-	0	-	0	-	-	-	-	-	-	-	-	-	-	-	-	-	-	-	-	-	-	-	-	-	-	-	-	-
KPN148	plasmid_AA035	unknown		9	13462	24655	58327	no	-	NA	0	0	0	0	-	0	-	0	-	0	-	0	-	0	-	-	-	-	-	-	-	-	-	-	-	-	-	-	-	-	-	-	-	-	-	-	-	-	-
KPN174	plasmid_AA035	unknown		12	26400	28411	108039	no	-	NA	0	0	0	0	-	0	-	0	-	0	-	0	-	0	-	-	-	-	-	-	-	-	-	-	-	-	-	-	-	-	-	-	-	-	-	-	-	-	-
KPN121	plasmid_AA038	unknown		2	37860	37860	41401	no	-	NA	0	0	0	0	-	0	-	0	-	0	-	0	-	0	-	-	-	-	-	-	-	-	-	-	-	-	-	-	-	-	-	-	-	-	-	-	-	-	-
KPN148	plasmid_AA043	unknown		3	35669	35669	58127	no	-	NA	0	0	0	0	-	0	-	0	-	0	-	0	-	0	-	-	-	-	-	-	-	-	-	-	-	-	-	-	-	-	-	-	-	-	-	-	-	-	-
KPN30	plasmid_AA045	unknown		5	21854	31111	82300	no	-	NA	0	0	1	1	-	0	-	0	-	0	-	0	-	0	-	-	-	-	-	-	-	-	-	-	-	sul2	-	-	-	-	-	-	-	-	-	-	-	-	-
KPN96	plasmid_AA045	unknown		19	12273	84154	175155	no	-	NA	0	0	7	9	-	0	-	0	-	0	-	0	-	0	-	-	-	aac(3)-IId^;aadA2^	-	-	-	-	mphA	catII.2*	-	sul1;sul2	tet(D)	-	dfrA12	TEM-1D.v1^	-	-	-	-	-	-	-	-	-
KPN73	plasmid_AA048	unknown		3	4186	7823	15791	no	N50	NA	0	0	0	0	-	0	-	0	-	0	-	0	-	0	-	-	-	-	-	-	-	-	-	-	-	-	-	-	-	-	-	-	-	-	-	-	-	-	-
KPN119	plasmid_AA050	unknown		8	13335	16775	56369	no	-	NA	0	0	0	0	-	0	-	0	-	0	-	0	-	0	-	-	-	-	-	-	-	-	-	-	-	-	-	-	-	-	-	-	-	-	-	-	-	-	-
KPN120	plasmid_AA050	unknown		2	31307	31307	36773	no	-	NA	0	0	0	0	-	0	-	0	-	0	-	0	-	0	-	-	-	-	-	-	-	-	-	-	-	-	-	-	-	-	-	-	-	-	-	-	-	-	-
KPN135	plasmid_AA050	unknown		6	14784	16474	51433	no	-	NA	0	0	0	0	-	0	-	0	-	0	-	0	-	0	-	-	-	-	-	-	-	-	-	-	-	-	-	-	-	-	-	-	-	-	-	-	-	-	-
KPN152	plasmid_AA050	unknown		9	14027	16476	72646	no	-	NA	0	0	0	0	-	0	-	0	-	0	-	0	-	0	-	-	-	-	-	-	-	-	-	-	-	-	-	-	-	-	-	-	-	-	-	-	-	-	-
KPN094	plasmid_AA103	unknown		1	4426	4426	4426	no	N50	NA	0	0	0	0	-	0	-	0	-	0	-	0	-	0	-	-	-	-	-	-	-	-	-	-	-	-	-	-	-	-	-	-	-	-	-	-	-	-	-
KPN132	plasmid_AA103	unknown		1	4094	4094	4094	no	N50	NA	0	0	0	0	-	0	-	0	-	0	-	0	-	0	-	-	-	-	-	-	-	-	-	-	-	-	-	-	-	-	-	-	-	-	-	-	-	-	-
KPN157	plasmid_AA103	unknown		1	4244	4244	4244	no	N50	NA	0	0	0	0	-	0	-	0	-	0	-	0	-	0	-	-	-	-	-	-	-	-	-	-	-	-	-	-	-	-	-	-	-	-	-	-	-	-	-
KPN100	plasmid_AA104	unknown		1	4311	4311	4311	no	N50	NA	0	0	0	0	-	0	-	0	-	0	-	0	-	0	-	-	-	-	-	-	-	-	-	-	-	-	-	-	-	-	-	-	-	-	-	-	-	-	-
KPN122	plasmid_AA104	unknown		1	4242	4242	4242	no	N50	NA	0	0	0	0	-	0	-	0	-	0	-	0	-	0	-	-	-	-	-	-	-	-	-	-	-	-	-	-	-	-	-	-	-	-	-	-	-	-	-
KPN123	plasmid_AA104	unknown		1	3606	3606	3606	no	N50	NA	0	0	0	0	-	0	-	0	-	0	-	0	-	0	-	-	-	-	-	-	-	-	-	-	-	-	-	-	-	-	-	-	-	-	-	-	-	-	-
KPN139	plasmid_AA104	unknown		1	4312	4312	4312	no	N50	NA	0	0	0	0	-	0	-	0	-	0	-	0	-	0	-	-	-	-	-	-	-	-	-	-	-	-	-	-	-	-	-	-	-	-	-	-	-	-	-
KPN142	plasmid_AA104	unknown		1	4242	4242	4242	no	N50	NA	0	0	0	0	-	0	-	0	-	0	-	0	-	0	-	-	-	-	-	-	-	-	-	-	-	-	-	-	-	-	-	-	-	-	-	-	-	-	-
KPN161	plasmid_AA104	unknown		1	2435	2435	2435	no	N50	NA	0	0	0	0	-	0	-	0	-	0	-	0	-	0	-	-	-	-	-	-	-	-	-	-	-	-	-	-	-	-	-	-	-	-	-	-	-	-	-
KPN44	plasmid_AA104	unknown		1	5504	5504	5504	no	N50	NA	0	0	0	0	-	0	-	0	-	0	-	0	-	0	-	-	-	-	-	-	-	-	-	-	-	-	-	-	-	-	-	-	-	-	-	-	-	-	-
KPN158	plasmid_AA106	unknown		1	5565	5565	5565	no	N50	NA	0	0	0	0	-	0	-	0	-	0	-	0	-	0	-	-	-	-	-	-	-	-	-	-	-	-	-	-	-	-	-	-	-	-	-	-	-	-	-
KPN40	plasmid_AA108	unknown		1	4153	4153	4153	no	N50	NA	0	0	0	0	-	0	-	0	-	0	-	0	-	0	-	-	-	-	-	-	-	-	-	-	-	-	-	-	-	-	-	-	-	-	-	-	-	-	-
KPN128	plasmid_AA109	unknown		1	4114	4114	4114	no	N50	NA	0	0	0	0	-	0	-	0	-	0	-	0	-	0	-	-	-	-	-	-	-	-	-	-	-	-	-	-	-	-	-	-	-	-	-	-	-	-	-
KPN094	plasmid_AA110	unknown		1	3929	3929	3929	no	N50	NA	0	0	0	0	-	0	-	0	-	0	-	0	-	0	-	-	-	-	-	-	-	-	-	-	-	-	-	-	-	-	-	-	-	-	-	-	-	-	-
KPN106	plasmid_AA111	unknown		1	1258	1258	1258	no	N50	NA	0	0	0	0	-	0	-	0	-	0	-	0	-	0	-	-	-	-	-	-	-	-	-	-	-	-	-	-	-	-	-	-	-	-	-	-	-	-	-
KPN172	plasmid_AA111	unknown		1	5801	5801	5801	no	N50	NA	0	0	0	0	-	0	-	0	-	0	-	0	-	0	-	-	-	-	-	-	-	-	-	-	-	-	-	-	-	-	-	-	-	-	-	-	-	-	-
KPN135	plasmid_AA113	unknown		1	3626	3626	3626	no	N50	NA	0	0	0	0	-	0	-	0	-	0	-	0	-	0	-	-	-	-	-	-	-	-	-	-	-	-	-	-	-	-	-	-	-	-	-	-	-	-	-
KPN50	plasmid_AA113	unknown		1	2987	2987	2987	no	N50	NA	0	0	0	0	-	0	-	0	-	0	-	0	-	0	-	-	-	-	-	-	-	-	-	-	-	-	-	-	-	-	-	-	-	-	-	-	-	-	-
KPN104	plasmid_AA114	unknown		1	3010	3010	3010	no	N50	NA	0	0	0	0	-	0	-	0	-	0	-	0	-	0	-	-	-	-	-	-	-	-	-	-	-	-	-	-	-	-	-	-	-	-	-	-	-	-	-
KPN107	plasmid_AA114	unknown		1	3004	3004	3004	no	N50	NA	0	0	0	0	-	0	-	0	-	0	-	0	-	0	-	-	-	-	-	-	-	-	-	-	-	-	-	-	-	-	-	-	-	-	-	-	-	-	-
KPN151	plasmid_AA114	unknown		1	3010	3010	3010	no	N50	NA	0	0	0	0	-	0	-	0	-	0	-	0	-	0	-	-	-	-	-	-	-	-	-	-	-	-	-	-	-	-	-	-	-	-	-	-	-	-	-
KPN166	plasmid_AA114	unknown		1	3010	3010	3010	no	N50	NA	0	0	0	0	-	0	-	0	-	0	-	0	-	0	-	-	-	-	-	-	-	-	-	-	-	-	-	-	-	-	-	-	-	-	-	-	-	-	-
KPN18	plasmid_AA114	unknown		1	3054	3054	3054	no	N50	NA	0	0	0	0	-	0	-	0	-	0	-	0	-	0	-	-	-	-	-	-	-	-	-	-	-	-	-	-	-	-	-	-	-	-	-	-	-	-	-
KPN39	plasmid_AA114	unknown		1	3004	3004	3004	no	N50	NA	0	0	0	0	-	0	-	0	-	0	-	0	-	0	-	-	-	-	-	-	-	-	-	-	-	-	-	-	-	-	-	-	-	-	-	-	-	-	-
KPN3	plasmid_AA114	unknown		1	3060	3060	3060	no	N50	NA	0	0	0	0	-	0	-	0	-	0	-	0	-	0	-	-	-	-	-	-	-	-	-	-	-	-	-	-	-	-	-	-	-	-	-	-	-	-	-
KPN093	plasmid_AA119	unknown		1	3801	3801	3801	no	N50	NA	0	0	0	0	-	0	-	0	-	0	-	0	-	0	-	-	-	-	-	-	-	-	-	-	-	-	-	-	-	-	-	-	-	-	-	-	-	-	-
KPN83	plasmid_AA119	unknown		1	3751	3751	3751	no	N50	NA	0	0	0	0	-	0	-	0	-	0	-	0	-	0	-	-	-	-	-	-	-	-	-	-	-	-	-	-	-	-	-	-	-	-	-	-	-	-	-
KPN174	plasmid_AA121	unknown		1	5068	5068	5068	no	N50	NA	0	0	0	0	-	0	-	0	-	0	-	0	-	0	-	-	-	-	-	-	-	-	-	-	-	-	-	-	-	-	-	-	-	-	-	-	-	-	-
KPN146	plasmid_AA122	unknown		1	4334	4334	4334	no	N50	NA	0	0	0	0	-	0	-	0	-	0	-	0	-	0	-	-	-	-	-	-	-	-	-	-	-	-	-	-	-	-	-	-	-	-	-	-	-	-	-
KPN161	plasmid_AA122	unknown		1	4457	4457	4457	no	N50	NA	0	0	0	0	-	0	-	0	-	0	-	0	-	0	-	-	-	-	-	-	-	-	-	-	-	-	-	-	-	-	-	-	-	-	-	-	-	-	-
KPN139	plasmid_AA123	unknown		1	2858	2858	2858	no	N50	NA	0	0	0	0	-	0	-	0	-	0	-	0	-	0	-	-	-	-	-	-	-	-	-	-	-	-	-	-	-	-	-	-	-	-	-	-	-	-	-
KPN176	plasmid_AA123	unknown		1	3229	3229	3229	no	N50	NA	0	0	0	0	-	0	-	0	-	0	-	0	-	0	-	-	-	-	-	-	-	-	-	-	-	-	-	-	-	-	-	-	-	-	-	-	-	-	-
KPN174	plasmid_AA129	unknown		1	4196	4196	4196	no	N50	NA	0	0	0	0	-	0	-	0	-	0	-	0	-	0	-	-	-	-	-	-	-	-	-	-	-	-	-	-	-	-	-	-	-	-	-	-	-	-	-
KPN50	plasmid_AA129	unknown		1	4359	4359	4359	no	N50	NA	0	0	0	0	-	0	-	0	-	0	-	0	-	0	-	-	-	-	-	-	-	-	-	-	-	-	-	-	-	-	-	-	-	-	-	-	-	-	-
KPN121	plasmid_AA130	unknown		1	3553	3553	3553	no	N50	NA	0	0	0	0	-	0	-	0	-	0	-	0	-	0	-	-	-	-	-	-	-	-	-	-	-	-	-	-	-	-	-	-	-	-	-	-	-	-	-
KPN133	plasmid_AA131	unknown		1	4908	4908	4908	no	N50	NA	0	0	0	0	-	0	-	0	-	0	-	0	-	0	-	-	-	-	-	-	-	-	-	-	-	-	-	-	-	-	-	-	-	-	-	-	-	-	-
KPN103	plasmid_AA274	unknown		7	18275	37984	96613	no	-	NA	0	0	0	0	-	0	-	0	-	0	-	0	-	0	-	-	-	-	-	-	-	-	-	-	-	-	-	-	-	-	-	-	-	-	-	-	-	-	-
KPN25	plasmid_AA274	unknown		7	57188	57188	91386	no	-	NA	0	0	0	0	-	0	-	0	-	0	-	0	-	0	-	-	-	-	-	-	-	-	-	-	-	-	-	-	-	-	-	-	-	-	-	-	-	-	-
KPN52	plasmid_AA274	unknown		7	107568	107568	163448	no	-	NA	0	0	1	2	-	0	-	0	-	0	-	0	-	0	-	-	-	strA.v1;strB.v1	-	-	-	-	-	-	-	-	-	-	-	-	-	-	-	-	-	-	-	-	-
KPN094	plasmid_AA275	unknown		16	63703	76147	206692	no	-	NA	0	0	4	4	-	0	-	0	-	0	-	0	-	0	-	-	-	aph3-Ia.v1^	-	-	-	-	mphA	cmlA5	-	-	tet(A).v1	-	-	-	-	-	-	-	-	-	-	-	-
KPN104	plasmid_AA275	unknown		33	11614	37089	188064	no	-	NA	0	0	0	0	-	0	-	0	-	0	-	0	-	0	-	-	-	-	-	-	-	-	-	-	-	-	-	-	-	-	-	-	-	-	-	-	-	-	-
KPN107	plasmid_AA275	unknown		49	8161	23389	236526	no	N50	NA	0	0	3	3	-	0	-	0	-	0	-	0	-	0	-	-	-	aph3-Ia.v1^	-	-	-	-	mphA	catA1^	-	-	-	-	-	-	-	-	-	-	-	-	-	-	-
KPN118	plasmid_AA275	unknown		2	37135	37135	63293	no	-	NA	0	0	0	0	-	0	-	0	-	0	-	0	-	0	-	-	-	-	-	-	-	-	-	-	-	-	-	-	-	-	-	-	-	-	-	-	-	-	-
KPN121	plasmid_AA275	unknown		11	24784	58181	171890	no	-	NA	0	0	0	0	-	0	-	0	-	0	-	0	-	0	-	-	-	-	-	-	-	-	-	-	-	-	-	-	-	-	-	-	-	-	-	-	-	-	-
KPN124	plasmid_AA275	unknown		21	30230	39919	174650	no	-	NA	0	0	1	1	-	0	-	0	-	0	-	0	-	0	-	-	-	-	-	-	-	-	-	-	-	-	tet(D)	-	-	-	-	-	-	-	-	-	-	-	-
KPN125	plasmid_AA275	unknown		3	118235	118235	124446	no	-	NA	0	0	0	0	-	0	-	0	-	0	-	0	-	0	-	-	-	-	-	-	-	-	-	-	-	-	-	-	-	-	-	-	-	-	-	-	-	-	-
KPN137	plasmid_AA275	unknown		17	24323	49836	197845	no	-	NA	0	0	0	0	-	0	-	0	-	0	-	0	-	0	-	-	-	-	-	-	-	-	-	-	-	-	-	-	-	-	-	-	-	-	SHV-1^	-	-	-	-
KPN140	plasmid_AA275	unknown		32	12468	51975	183864	no	-	NA	0	0	1	1	-	0	-	0	-	0	-	0	-	0	-	-	-	-	-	-	-	-	-	catA1^	-	-	-	-	-	-	-	-	-	-	-	-	-	-	-
KPN151	plasmid_AA275	unknown		24	27208	42222	196240	no	-	NA	0	0	4	4	-	0	-	0	-	0	-	0	-	0	-	-	-	aadA2^	-	-	-	-	-	catA1^	-	sul1	-	-	dfrA12	-	-	-	-	-	-	-	-	-	-
KPN166	plasmid_AA275	unknown		23	27208	35164	182361	no	-	NA	0	0	4	4	-	0	-	0	-	0	-	0	-	0	-	-	-	aadA2^	-	-	-	-	-	catA1^	-	sul1	-	-	dfrA12	-	-	-	-	-	-	-	-	-	-
KPN167	plasmid_AA275	unknown		14	22726	38405	171329	no	-	NA	0	0	0	0	-	0	-	0	-	0	-	0	-	0	-	-	-	-	-	-	-	-	-	-	-	-	-	-	-	-	-	-	-	-	-	-	-	-	-
KPN168	plasmid_AA275	unknown		14	46650	52195	182913	no	-	NA	0	0	1	1	-	0	-	0	-	0	-	0	-	0	-	-	-	-	-	-	-	-	-	-	-	sul1	-	-	-	-	-	-	-	-	-	-	-	-	-
KPN171	plasmid_AA275	unknown		3	31343	31343	40659	no	-	NA	0	0	0	0	-	0	-	0	-	0	-	0	-	0	-	-	-	-	-	-	-	-	-	-	-	-	-	-	-	-	-	-	-	-	-	-	-	-	-
KPN175	plasmid_AA275	unknown		3	31343	31343	40659	no	-	NA	0	0	0	0	-	0	-	0	-	0	-	0	-	0	-	-	-	-	-	-	-	-	-	-	-	-	-	-	-	-	-	-	-	-	-	-	-	-	-
KPN18	plasmid_AA275	unknown		44	11849	23609	251086	no	-	NA	0	0	3	3	-	0	-	0	-	0	-	0	-	0	-	-	-	aph3-Ia.v1^	-	-	-	-	mphA	catA1^	-	-	-	-	-	-	-	-	-	-	-	-	-	-	-
KPN25	plasmid_AA275	unknown		7	24095	30381	75674	no	-	NA	0	0	1	1	-	0	-	0	-	0	-	0	-	0	-	-	-	-	-	-	-	-	-	-	-	-	tet(D)	-	-	-	-	-	-	-	-	-	-	-	-
KPN31	plasmid_AA275	unknown		7	38957	62436	162597	no	-	NA	0	0	0	0	-	0	-	0	-	0	-	0	-	0	-	-	-	-	-	-	-	-	-	-	-	-	-	-	-	-	-	-	-	-	-	-	-	-	-
KPN32	plasmid_AA275	unknown		8	39999	62436	163615	yes (1)	ambiguous_bases	NA	0	0	0	0	-	0	-	0	-	0	-	0	-	0	-	-	-	-	-	-	-	-	-	-	-	-	-	-	-	-	-	-	-	-	-	-	-	-	-
KPN33	plasmid_AA275	unknown		8	41579	62336	164132	no	-	NA	0	0	0	0	-	0	-	0	-	0	-	0	-	0	-	-	-	-	-	-	-	-	-	-	-	-	-	-	-	-	-	-	-	-	-	-	-	-	-
KPN34	plasmid_AA275	unknown		8	41579	62336	164018	no	-	NA	0	0	0	0	-	0	-	0	-	0	-	0	-	0	-	-	-	-	-	-	-	-	-	-	-	-	-	-	-	-	-	-	-	-	-	-	-	-	-
KPN37	plasmid_AA275	unknown		21	30241	46903	200512	no	-	NA	0	0	1	1	-	0	-	0	-	0	-	0	-	0	-	-	-	-	-	-	-	-	-	-	-	-	tet(D)	-	-	-	-	-	-	-	SHV-1^	-	-	-	-
KPN3	plasmid_AA275	unknown		30	15827	42430	209236	no	-	NA	0	0	0	0	-	0	-	0	-	0	-	0	-	0	-	-	-	-	-	-	-	-	-	-	-	-	-	-	-	-	-	-	-	-	-	-	-	-	-
KPN41	plasmid_AA275	unknown		18	16487	38853	166773	no	-	NA	0	0	0	0	-	0	-	0	-	0	-	0	-	0	-	-	-	-	-	-	-	-	-	-	-	-	-	-	-	-	-	-	-	-	-	-	-	-	-
KPN44	plasmid_AA275	unknown		16	22906	35631	168400	no	-	NA	0	0	3	3	-	0	-	0	-	0	-	0	-	0	-	-	-	aadA1.v1^	-	-	-	-	-	-	-	sul1	-	-	dfrA1.v2	-	-	-	-	-	SHV-1^	-	-	-	-
KPN47	plasmid_AA275	unknown		20	30190	46832	201020	no	-	NA	0	0	1	1	-	0	-	0	-	0	-	0	-	0	-	-	-	-	-	-	-	-	-	-	-	-	tet(D)	-	-	-	-	-	-	-	SHV-1^	-	-	-	-
KPN80	plasmid_AA275	unknown		13	18974	38755	102910	no	-	NA	0	0	0	0	-	0	-	0	-	0	-	0	-	0	-	-	-	-	-	-	-	-	-	-	-	-	-	-	-	-	-	-	-	-	-	-	-	-	-
KPN83	plasmid_AA275	unknown		25	12135	40031	180752	no	-	NA	0	0	0	0	-	0	-	0	-	0	-	0	-	0	-	-	-	-	-	-	-	-	-	-	-	-	-	-	-	-	-	-	-	-	-	-	-	-	-
KPN88	plasmid_AA275	unknown		24	25852	57932	200186	no	-	NA	0	0	5	7	-	0	-	0	-	0	-	0	-	0	-	-	-	aac(3)-IV*;aph(4)-Ia;aph3-Ia.v1^	-	-	-	-	mphA	catA1^	-	sul1	-	-	dfrA12	-	-	-	-	-	-	-	-	-	-
KPN45	plasmid_AA276	unknown		2	35524	35524	58064	no	-	NA	0	0	0	0	-	0	-	0	-	0	-	0	-	0	-	-	-	-	-	-	-	-	-	-	-	-	-	-	-	-	-	-	-	-	-	-	-	-	-
KPN51	plasmid_AA276	unknown		9	32646	56515	144350	no	-	NA	0	0	2	2	-	0	-	0	-	0	-	0	-	0	-	-	-	-	-	-	qnrB1.v2^	-	-	-	-	-	tet(A).v1	-	-	-	-	-	-	-	-	-	-	-	-
KPN119	plasmid_AA277	unknown		48	6288	35396	217493	no	N50	NA	0	0	0	0	-	0	-	0	-	0	-	0	-	0	-	-	-	-	-	-	-	-	-	-	-	-	-	-	-	-	-	-	-	-	-	-	-	-	-
KPN120	plasmid_AA277	unknown		27	36294	45464	162941	no	-	NA	0	0	0	0	-	0	-	0	-	0	-	0	-	0	-	-	-	-	-	-	-	-	-	-	-	-	-	-	-	-	-	-	-	-	-	-	-	-	-
KPN131	plasmid_AA277	unknown		9	38385	87717	199395	no	-	NA	0	0	0	0	-	0	-	0	-	0	-	0	-	0	-	-	-	-	-	-	-	-	-	-	-	-	-	-	-	-	-	-	-	-	-	-	-	-	-
KPN144	plasmid_AA277	unknown		4	77150	77150	81284	no	-	NA	0	0	0	0	-	0	-	0	-	0	-	0	-	0	-	-	-	-	-	-	-	-	-	-	-	-	-	-	-	-	-	-	-	-	-	-	-	-	-
KPN145	plasmid_AA277	unknown		5	48724	79545	166266	no	-	NA	0	0	0	0	-	0	-	0	-	0	-	0	-	0	-	-	-	-	-	-	-	-	-	-	-	-	-	-	-	-	-	-	-	-	-	-	-	-	-
KPN154	plasmid_AA277	unknown		30	14114	34846	250840	no	-	NA	0	0	0	0	-	0	-	0	-	0	-	0	-	0	-	-	-	-	-	-	-	-	-	-	-	-	-	-	-	-	-	-	-	-	-	-	-	-	-
KPN171	plasmid_AA277	unknown		8	28618	58847	154555	no	-	NA	0	0	0	0	-	0	-	0	-	0	-	0	-	0	-	-	-	-	-	-	-	-	-	-	-	-	-	-	-	-	-	-	-	-	-	-	-	-	-
KPN175	plasmid_AA277	unknown		8	28618	58847	154684	no	-	NA	0	0	0	0	-	0	-	0	-	0	-	0	-	0	-	-	-	-	-	-	-	-	-	-	-	-	-	-	-	-	-	-	-	-	-	-	-	-	-
KPN17	plasmid_AA277	unknown		25	14676	21968	161211	no	-	NA	0	0	0	0	-	0	-	0	-	0	-	0	-	0	-	-	-	-	-	-	-	-	-	-	-	-	-	-	-	-	-	-	-	-	-	-	-	-	-
KPN46	plasmid_AA277	unknown		1	175418	175418	175418	no	-	NA	0	0	0	0	-	0	-	0	-	0	-	0	-	0	-	-	-	-	-	-	-	-	-	-	-	-	-	-	-	-	-	-	-	-	-	-	-	-	-
KPN84	plasmid_AA277	unknown		9	13679	37486	115272	no	-	NA	0	0	0	0	-	0	-	0	-	0	-	0	-	0	-	-	-	-	-	-	-	-	-	-	-	-	-	-	-	-	-	-	-	-	-	-	-	-	-
KPN51	plasmid_AA307	unknown		1	60011	60011	60011	no	-	NA	0	0	0	0	-	0	-	0	-	0	-	0	-	0	-	-	-	-	-	-	-	-	-	-	-	-	-	-	-	-	-	-	-	-	-	-	-	-	-
KPN095	plasmid_AA334	unknown		7	76536	76536	108357	no	-	NA	0	0	6	9	-	0	-	0	-	0	-	0	-	0	-	-	-	aadA5;strA.v1^;strB.v1*	-	-	-	-	mphA	-	-	sul1;sul2	tet(A).v1*	-	dfrA17	TEM-215*	-	-	-	-	-	-	-	-	-
KPN69	plasmid_AA334	unknown		4	34929	34929	55543	no	-	NA	0	0	5	5	-	0	-	0	-	0	-	0	-	0	-	-	-	aadA5	-	-	-	-	mphA	-	-	sul1	-	-	dfrA17	TEM-215*	-	-	-	-	-	-	-	-	-
KPN70	plasmid_AA334	unknown		4	40471	40471	61085	no	-	NA	0	0	5	5	-	0	-	0	-	0	-	0	-	0	-	-	-	aadA5	-	-	-	-	mphA	-	-	sul1	-	-	dfrA17	TEM-215*	-	-	-	-	-	-	-	-	-
KPN148	plasmid_AA336	unknown		2	66177	66177	73836	no	-	NA	0	0	1	1	-	0	-	0	-	0	-	0	-	0	-	-	-	-	-	-	-	-	-	-	-	-	-	-	-	TEM-1D.v1^	-	-	-	-	-	-	-	-	-
KPN69	plasmid_AA337	unknown		2	28640	28640	34875	no	-	NA	0	0	3	4	-	0	-	0	-	0	-	0	-	0	-	-	-	strA.v1^;strB.v1*	-	-	-	-	-	-	-	sul2	tet(A).v1*	-	-	-	-	-	-	-	-	-	-	-	-
KPN70	plasmid_AA337	unknown		2	28633	28633	34868	no	-	NA	0	0	3	4	-	0	-	0	-	0	-	0	-	0	-	-	-	strA.v1^;strB.v1*	-	-	-	-	-	-	-	sul2	tet(A).v1*	-	-	-	-	-	-	-	-	-	-	-	-
KPN165	plasmid_AA398	unknown		2	58042	58042	86989	no	-	NA	3	0	0	0	-	0	-	0	iuc 2	14-1LV	iro 2	12	rmp 2; KpVP-2	7	-	-	-	-	-	-	-	-	-	-	-	-	-	-	-	-	-	-	-	-	-	-	-	-	-
KPN49	plasmid_AA398	unknown		5	29376	36966	116127	no	-	NA	3	0	0	0	-	0	-	0	iuc 2	6	iro 2	22-2LV	rmp 2; KpVP-2	2	-	-	-	-	-	-	-	-	-	-	-	-	-	-	-	-	-	-	-	-	-	-	-	-	-
KPN42	plasmid_AA402	unknown		9	27540	39231	95088	no	-	NA	0	0	0	0	-	0	-	0	-	0	-	0	-	0	-	-	-	-	-	-	-	-	-	-	-	-	-	-	-	-	-	-	-	-	-	-	-	-	-
KPN43	plasmid_AA402	unknown		11	25804	39231	105293	no	-	NA	0	0	0	0	-	0	-	0	-	0	-	0	-	0	-	-	-	-	-	-	-	-	-	-	-	-	-	-	-	-	-	-	-	-	-	-	-	-	-
KPN71	plasmid_AA402	unknown		17	22852	42574	187132	no	-	NA	0	0	3	4	-	0	-	0	-	0	-	0	-	0	-	-	-	aadA2^;aph3-Ia.v1^	-	-	-	-	-	-	-	-	tet(A).v1	-	dfrA12	-	-	-	-	-	-	-	-	-	-
KPN74	plasmid_AA402	unknown		17	22852	42750	186405	no	-	NA	0	0	3	4	-	0	-	0	-	0	-	0	-	0	-	-	-	aadA2^;aph3-Ia.v1^	-	-	-	-	-	-	-	-	tet(A).v1	-	dfrA12	-	-	-	-	-	-	-	-	-	-
KPN104	plasmid_AA404	unknown		8	42465	49765	206683	no	-	NA	0	0	0	0	-	0	-	0	-	0	-	0	-	0	-	-	-	-	-	-	-	-	-	-	-	-	-	-	-	-	-	-	-	-	-	-	-	-	-
KPN3	plasmid_AA404	unknown		9	42331	44634	208460	no	-	NA	0	0	0	0	-	0	-	0	-	0	-	0	-	0	-	-	-	-	-	-	-	-	-	-	-	-	-	-	-	-	-	-	-	-	-	-	-	-	-
KPN106	plasmid_AA405	unknown		24	18990	62051	310011	no	-	NA	0	0	0	0	-	0	-	0	-	0	-	0	-	0	-	-	-	-	-	-	-	-	-	-	-	-	-	-	-	-	-	-	-	-	-	-	-	-	-
KPN40	plasmid_AA405	unknown		9	48909	62968	154570	no	-	NA	0	0	0	0	-	0	-	0	-	0	-	0	-	0	-	-	-	-	-	-	-	-	-	-	-	-	-	-	-	-	-	-	-	-	-	-	-	-	-
KPN45	plasmid_AA405	unknown		3	231508	231508	236626	no	-	NA	0	0	0	0	-	0	-	0	-	0	-	0	-	0	-	-	-	-	-	-	-	-	-	-	-	-	-	-	-	-	-	-	-	-	-	-	-	-	-
KPN115	plasmid_AA406	unknown		12	27951	60958	220944	no	-	NA	3	0	0	0	-	0	-	0	iuc 1	1	iro 1	2	rmp 1; KpVP-1	26	rmpA2_3*-47%	-	-	-	-	-	-	-	-	-	-	-	-	-	-	-	-	-	-	-	-	-	-	-	-
KPN89	plasmid_AA406	unknown		10	38446	79310	224752	no	-	NA	3	0	0	0	-	0	-	0	iuc 1	1	iro 1	2	rmp 1; KpVP-1	26	-	-	-	-	-	-	-	-	-	-	-	-	-	-	-	-	-	-	-	-	-	-	-	-	-
KPN8	plasmid_AA406	unknown		14	25503	57995	224002	no	-	NA	3	0	0	0	-	0	-	0	iuc 1	1	iro 1	2	rmp 1; KpVP-1	26	-	-	-	-	-	-	-	-	-	-	-	-	-	-	-	-	-	-	-	-	-	-	-	-	-
KPN093	plasmid_AA421	unknown		1	13124	13124	13124	no	-	NA	0	0	0	0	-	0	-	0	-	0	-	0	-	0	-	-	-	-	-	-	-	-	-	-	-	-	-	-	-	-	-	-	-	-	-	-	-	-	-
KPN83	plasmid_AA421	unknown		1	13024	13024	13024	no	-	NA	0	0	0	0	-	0	-	0	-	0	-	0	-	0	-	-	-	-	-	-	-	-	-	-	-	-	-	-	-	-	-	-	-	-	-	-	-	-	-
KPN119	plasmid_AA433	unknown		4	38344	38344	67883	no	-	NA	0	0	0	0	-	0	-	0	-	0	-	0	-	0	-	-	-	-	-	-	-	-	-	-	-	-	-	-	-	-	-	-	-	-	-	-	-	-	-
KPN120	plasmid_AA433	unknown		4	38344	38344	67462	no	-	NA	0	0	0	0	-	0	-	0	-	0	-	0	-	0	-	-	-	-	-	-	-	-	-	-	-	-	-	-	-	-	-	-	-	-	-	-	-	-	-
KPN104	plasmid_AA434	unknown		6	12671	13527	52193	no	-	NA	0	0	0	0	-	0	-	0	-	0	-	0	-	0	-	-	-	-	-	-	-	-	-	-	-	-	-	-	-	-	-	-	-	-	-	-	-	-	-
KPN35	plasmid_AA434	unknown		11	19460	29520	121988	no	-	NA	0	0	3	5	-	0	-	0	-	0	-	0	-	0	-	-	-	aac(6')-Ib'.v1*;aadA*	-	-	-	-	-	-	-	-	-	-	dfrA14.v2*	OXA-9.v1;TEM-1D.v1^	-	-	-	-	-	-	-	-	-
KPN3	plasmid_AA434	unknown		4	13628	13628	25449	no	-	NA	0	0	0	0	-	0	-	0	-	0	-	0	-	0	-	-	-	-	-	-	-	-	-	-	-	-	-	-	-	-	-	-	-	-	-	-	-	-	-
KPN098	plasmid_AA447	unknown		3	31525	31525	48170	no	-	NA	0	0	0	0	-	0	-	0	-	0	-	0	-	0	-	-	-	-	-	-	-	-	-	-	-	-	-	-	-	-	-	-	-	-	-	-	-	-	-
KPN156	plasmid_AA447	unknown		3	73859	73859	113461	no	-	NA	0	0	0	0	-	0	-	0	-	0	-	0	-	0	-	-	-	-	-	-	-	-	-	-	-	-	-	-	-	-	-	-	-	-	-	-	-	-	-
KPN165	plasmid_AA448	unknown		5	72729	72729	86689	no	-	NA	0	0	0	0	-	0	-	0	-	0	-	0	-	0	-	-	-	-	-	-	-	-	-	-	-	-	-	-	-	-	-	-	-	-	-	-	-	-	-
KPN172	plasmid_AA448	unknown		9	11906	35111	86660	no	-	NA	0	0	0	0	-	0	-	0	-	0	-	0	-	0	-	-	-	-	-	-	-	-	-	-	-	-	-	-	-	-	-	-	-	-	-	-	-	-	-
KPN22	plasmid_AA448	unknown		18	15291	30524	125794	no	-	NA	0	0	0	0	-	0	-	0	-	0	-	0	-	0	-	-	-	-	-	-	-	-	-	-	-	-	-	-	-	-	-	-	-	-	-	-	-	-	-
KPN093	plasmid_AA449	unknown		10	19490	48146	105655	no	-	NA	0	0	0	0	-	0	-	0	-	0	-	0	-	0	-	-	-	-	-	-	-	-	-	-	-	-	-	-	-	-	-	-	-	-	-	-	-	-	-
KPN148	plasmid_AA449	unknown		5	37467	37467	57504	no	-	NA	0	0	0	0	-	0	-	0	-	0	-	0	-	0	-	-	-	-	-	-	-	-	-	-	-	-	-	-	-	-	-	-	-	-	-	-	-	-	-
KPN100	plasmid_AA450	unknown		17	12159	26865	98806	no	-	NA	0	0	0	0	-	0	-	0	-	0	-	0	-	0	-	-	-	-	-	-	-	-	-	-	-	-	-	-	-	-	-	-	-	-	-	-	-	-	-
KPN128	plasmid_AA450	unknown		4	21467	21467	31094	no	-	NA	0	0	0	0	-	0	-	0	-	0	-	0	-	0	-	-	-	-	-	-	-	-	-	-	-	-	-	-	-	-	-	-	-	-	-	-	-	-	-
KPN143	plasmid_AA450	unknown		4	47054	47054	62736	no	-	NA	0	0	0	0	-	0	-	0	-	0	-	0	-	0	-	-	-	-	-	-	-	-	-	-	-	-	-	-	-	-	-	-	-	-	-	-	-	-	-
KPN23	plasmid_AA454	unknown		14	41849	44406	172072	no	-	NA	3	0	1	1	-	0	-	0	iuc 3	13-2LV	-	0	-	0	-	-	-	-	-	-	-	-	-	-	-	-	tet(A).v1	-	-	-	-	-	-	-	-	-	-	-	-
KPN147	plasmid_AA455	unknown		6	88751	88751	136144	no	-	NA	0	0	0	0	-	0	-	0	-	0	-	0	-	0	-	-	-	-	-	-	-	-	-	-	-	-	-	-	-	-	-	-	-	-	-	-	-	-	-
KPN149	plasmid_AA455	unknown		4	88821	88821	137596	no	-	NA	0	0	0	0	-	0	-	0	-	0	-	0	-	0	-	-	-	-	-	-	-	-	-	-	-	-	-	-	-	-	-	-	-	-	-	-	-	-	-
KPN49	plasmid_AA456	unknown		5	51119	51119	93273	no	-	NA	0	0	0	0	-	0	-	0	-	0	-	0	-	0	-	-	-	-	-	-	-	-	-	-	-	-	-	-	-	-	-	-	-	-	-	-	-	-	-
KPN170	plasmid_AA457	unknown		14	26804	40769	198319	no	-	NA	0	0	4	5	-	0	-	0	-	0	-	0	-	0	-	-	-	strA.v1^;strB.v1	-	-	-	-	-	catA1^	-	sul2*	-	-	-	TEM-1D.v1^	-	-	-	-	-	-	-	-	-
KPN31	plasmid_AA457	unknown		3	40839	40839	66068	no	-	NA	0	0	0	0	-	0	-	0	-	0	-	0	-	0	-	-	-	-	-	-	-	-	-	-	-	-	-	-	-	-	-	-	-	-	-	-	-	-	-
KPN32	plasmid_AA457	unknown		3	40839	40839	66207	no	-	NA	0	0	0	0	-	0	-	0	-	0	-	0	-	0	-	-	-	-	-	-	-	-	-	-	-	-	-	-	-	-	-	-	-	-	-	-	-	-	-
KPN33	plasmid_AA457	unknown		3	40739	40739	65191	no	-	NA	0	0	0	0	-	0	-	0	-	0	-	0	-	0	-	-	-	-	-	-	-	-	-	-	-	-	-	-	-	-	-	-	-	-	-	-	-	-	-
KPN34	plasmid_AA457	unknown		3	40739	40739	65149	no	-	NA	0	0	0	0	-	0	-	0	-	0	-	0	-	0	-	-	-	-	-	-	-	-	-	-	-	-	-	-	-	-	-	-	-	-	-	-	-	-	-
KPN53	plasmid_AA457	unknown		7	80104	84820	195589	no	-	NA	0	0	0	0	-	0	-	0	-	0	-	0	-	0	-	-	-	-	-	-	-	-	-	-	-	-	-	-	-	-	-	-	-	-	-	-	-	-	-
KPN80	plasmid_AA457	unknown		11	15353	28736	101402	no	-	NA	0	0	0	0	-	0	-	0	-	0	-	0	-	0	-	-	-	-	-	-	-	-	-	-	-	-	-	-	-	-	-	-	-	-	-	-	-	-	-
KPN148	plasmid_AA459	unknown		9	15247	17060	78954	no	-	NA	0	0	0	0	-	0	-	0	-	0	-	0	-	0	-	-	-	-	-	-	-	-	-	-	-	-	-	-	-	-	-	-	-	-	-	-	-	-	-
KPN176	plasmid_AA459	unknown		5	23078	23078	42554	no	-	NA	0	0	0	0	-	0	-	0	-	0	-	0	-	0	-	-	-	-	-	-	-	-	-	-	-	-	-	-	-	-	-	-	-	-	-	-	-	-	-
KPN88	plasmid_AA474	unknown		5	26021	37455	97648	no	-	NA	0	0	1	1	-	0	-	0	-	0	-	0	-	0	-	-	-	aac(6')-Ib'.v1	-	-	-	-	-	-	-	-	-	-	-	-	-	-	-	-	-	-	-	-	-
KPN132	plasmid_AA521	unknown		1	5286	5286	5286	no	N50	NA	0	0	0	0	-	0	-	0	-	0	-	0	-	0	-	-	-	-	-	-	-	-	-	-	-	-	-	-	-	-	-	-	-	-	-	-	-	-	-
KPN167	plasmid_AA521	unknown		1	3361	3361	3361	no	N50	NA	0	0	0	0	-	0	-	0	-	0	-	0	-	0	-	-	-	-	-	-	-	-	-	-	-	-	-	-	-	-	-	-	-	-	-	-	-	-	-
KPN139	plasmid_AA523	unknown		1	5687	5687	5687	no	N50	NA	0	0	0	0	-	0	-	0	-	0	-	0	-	0	-	-	-	-	-	-	-	-	-	-	-	-	-	-	-	-	-	-	-	-	-	-	-	-	-
KPN123	plasmid_AA531	unknown		1	3300	3300	3300	no	N50	NA	0	0	0	0	-	0	-	0	-	0	-	0	-	0	-	-	-	-	-	-	-	-	-	-	-	-	-	-	-	-	-	-	-	-	-	-	-	-	-
KPN167	plasmid_AA531	unknown		1	3506	3506	3506	no	N50	NA	0	0	0	0	-	0	-	0	-	0	-	0	-	0	-	-	-	-	-	-	-	-	-	-	-	-	-	-	-	-	-	-	-	-	-	-	-	-	-
KPN104	plasmid_AA541	unknown		2	4485	4485	5908	no	N50	NA	0	0	0	0	-	0	-	0	-	0	-	0	-	0	-	-	-	-	-	-	-	-	-	-	-	-	-	-	-	-	-	-	-	-	-	-	-	-	-
KPN124	plasmid_AA541	unknown		1	5761	5761	5761	no	N50	NA	0	0	0	0	-	0	-	0	-	0	-	0	-	0	-	-	-	-	-	-	-	-	-	-	-	-	-	-	-	-	-	-	-	-	-	-	-	-	-
KPN3	plasmid_AA541	unknown		2	4693	4693	6324	no	N50	NA	0	0	0	0	-	0	-	0	-	0	-	0	-	0	-	-	-	-	-	-	-	-	-	-	-	-	-	-	-	-	-	-	-	-	-	-	-	-	-
KPN123	plasmid_AA552	unknown		6	6769	10029	22944	no	N50	NA	0	0	0	0	-	0	-	0	-	0	-	0	-	0	-	-	-	-	-	-	-	-	-	-	-	-	-	-	-	-	-	-	-	-	-	-	-	-	-
KPN51	plasmid_AA552	unknown		5	6942	6942	13519	no	N50	NA	0	0	1	1	-	0	-	0	-	0	-	0	-	0	-	-	-	-	-	-	-	-	-	-	-	-	-	-	dfrA14.v2*	-	-	-	-	-	-	-	-	-	-
KPN157	plasmid_AA553	unknown		1	13368	13368	13368	no	-	NA	0	0	1	1	-	0	-	0	-	0	-	0	-	0	-	-	-	-	-	-	-	-	-	-	-	-	-	-	dfrA14.v2*	-	-	-	-	-	-	-	-	-	-
KPN094	plasmid_AA554	unknown		10	3409	8262	23297	no	N50	NA	0	0	5	6	-	0	-	0	-	0	-	0	-	0	-	-	-	aadA2^	-	-	-	-	-	CatB4.v1	-	sul1	-	-	dfrA12	OXA-1;TEM-1D.v1^	-	-	-	-	-	-	-	-	-
KPN157	plasmid_AA554	unknown		3	17752	17752	20782	no	-	NA	0	0	3	4	-	0	-	0	-	0	-	0	-	0	-	-	-	strA.v1*;strB.v1*	-	-	-	-	-	catII.2*	-	sul2	-	-	-	-	-	-	-	-	-	-	-	-	-
KPN140	plasmid_AA583	unknown		3	14054	14054	20340	no	-	NA	0	0	0	0	-	0	-	0	-	0	-	0	-	0	-	-	-	-	-	-	-	-	-	-	-	-	-	-	-	-	-	-	-	-	-	-	-	-	-
KPN119	plasmid_AA814	unknown		10	9619	13261	59151	no	N50	NA	0	0	0	0	-	0	-	0	-	0	-	0	-	0	-	-	-	-	-	-	-	-	-	-	-	-	-	-	-	-	-	-	-	-	-	-	-	-	-
KPN155	plasmid_AA814	unknown		13	17564	31547	149864	no	-	NA	0	0	0	0	-	0	-	0	-	0	-	0	-	0	-	-	-	-	-	-	-	-	-	-	-	-	-	-	-	-	-	-	-	-	-	-	-	-	-
KPN45	plasmid_AA814	unknown		10	28415	44496	104217	no	-	NA	0	0	0	0	-	0	-	0	-	0	-	0	-	0	-	-	-	-	-	-	-	-	-	-	-	-	-	-	-	-	-	-	-	-	-	-	-	-	-
KPN118	plasmid_AA816	unknown		7	62323	62323	119311	no	-	NA	0	0	0	0	-	0	-	0	-	0	-	0	-	0	-	-	-	-	-	-	-	-	-	-	-	-	-	-	-	-	-	-	-	-	-	-	-	-	-
KPN134	plasmid_AA816	unknown		11	30354	56435	134077	no	-	NA	0	0	0	0	-	0	-	0	-	0	-	0	-	0	-	-	-	-	-	-	-	-	-	-	-	-	-	-	-	-	-	-	-	-	-	-	-	-	-
KPN141	plasmid_AA816	unknown		6	58513	58513	110006	no	-	NA	0	0	0	0	-	0	-	0	-	0	-	0	-	0	-	-	-	-	-	-	-	-	-	-	-	-	-	-	-	-	-	-	-	-	-	-	-	-	-
KPN173	plasmid_AA816	unknown		15	33330	38929	137949	no	-	NA	0	0	0	0	-	0	-	0	-	0	-	0	-	0	-	-	-	-	-	-	-	-	-	-	-	-	-	-	-	-	-	-	-	-	-	-	-	-	-
KPN73	plasmid_AA816	unknown		15	24281	32106	147436	no	-	NA	0	0	0	0	-	0	-	0	-	0	-	0	-	0	-	-	-	-	-	-	-	-	-	-	-	-	-	-	-	-	-	-	-	-	-	-	-	-	-
KPN87	plasmid_AA816	unknown		6	25245	25245	48655	no	-	NA	0	0	0	0	-	0	-	0	-	0	-	0	-	0	-	-	-	-	-	-	-	-	-	-	-	-	-	-	-	-	-	-	-	-	-	-	-	-	-
KPN157	plasmid_AA817	unknown		14	24152	30127	95690	no	-	NA	0	0	0	0	-	0	-	0	-	0	-	0	-	0	-	-	-	-	-	-	-	-	-	-	-	-	-	-	-	-	-	-	-	-	-	-	-	-	-
KPN36	plasmid_AA821	unknown		7	24503	56055	132735	no	-	NA	0	0	0	0	-	0	-	0	-	0	-	0	-	0	-	-	-	-	-	-	-	-	-	-	-	-	-	-	-	-	-	-	-	-	-	-	-	-	-
KPN133	plasmid_AA833	unknown		8	37018	37018	60498	no	-	NA	0	0	0	0	-	0	-	0	-	0	-	0	-	0	-	-	-	-	-	-	-	-	-	-	-	-	-	-	-	-	-	-	-	-	-	-	-	-	-
KPN174	plasmid_AA833	unknown		7	32734	32734	40514	no	-	NA	0	0	0	0	-	0	-	0	-	0	-	0	-	0	-	-	-	-	-	-	-	-	-	-	-	-	-	-	-	-	-	-	-	-	-	-	-	-	-
KPN24	plasmid_AA833	unknown		14	14002	22777	110570	no	-	NA	0	0	0	0	-	0	-	0	-	0	-	0	-	0	-	-	-	-	-	-	-	-	-	-	-	-	-	-	-	-	-	-	-	-	-	-	-	-	-
KPN50	plasmid_AA882	unknown		6	14231	14231	28315	no	-	NA	0	0	0	0	-	0	-	0	-	0	-	0	-	0	-	-	-	-	-	-	-	-	-	-	-	-	-	-	-	-	-	-	-	-	-	-	-	-	-
KPN095	plasmid_AA941	unknown		1	8779	8779	8779	no	N50	NA	0	0	0	0	-	0	-	0	-	0	-	0	-	0	-	-	-	-	-	-	-	-	-	-	-	-	-	-	-	-	-	-	-	-	-	-	-	-	-
KPN103	plasmid_AA941	unknown		3	9299	9299	13625	no	N50	NA	0	0	1	1	-	0	-	0	-	0	-	0	-	0	-	-	-	-	-	-	-	-	-	-	-	-	-	-	-	TEM-1D.v1^	-	-	-	-	-	-	-	-	-
KPN104	plasmid_AA941	unknown		5	9367	9371	24015	no	N50	NA	0	0	0	0	-	0	-	0	-	0	-	0	-	0	-	-	-	-	-	-	-	-	-	-	-	-	-	-	-	-	-	-	-	-	-	-	-	-	-
KPN105	plasmid_AA941	unknown		1	9371	9371	9371	no	N50	NA	0	0	0	0	-	0	-	0	-	0	-	0	-	0	-	-	-	-	-	-	-	-	-	-	-	-	-	-	-	-	-	-	-	-	-	-	-	-	-
KPN107	plasmid_AA941	unknown		3	9371	9371	17111	no	N50	NA	0	0	0	0	-	0	-	0	-	0	-	0	-	0	-	-	-	-	-	-	-	-	-	-	-	-	-	-	-	-	-	-	-	-	-	-	-	-	-
KPN127	plasmid_AA941	unknown		1	9371	9371	9371	no	N50	NA	0	0	0	0	-	0	-	0	-	0	-	0	-	0	-	-	-	-	-	-	-	-	-	-	-	-	-	-	-	-	-	-	-	-	-	-	-	-	-
KPN132	plasmid_AA941	unknown		1	9371	9371	9371	no	N50	NA	0	0	0	0	-	0	-	0	-	0	-	0	-	0	-	-	-	-	-	-	-	-	-	-	-	-	-	-	-	-	-	-	-	-	-	-	-	-	-
KPN137	plasmid_AA941	unknown		1	9371	9371	9371	no	N50	NA	0	0	0	0	-	0	-	0	-	0	-	0	-	0	-	-	-	-	-	-	-	-	-	-	-	-	-	-	-	-	-	-	-	-	-	-	-	-	-
KPN151	plasmid_AA941	unknown		1	9371	9371	9371	no	N50	NA	0	0	0	0	-	0	-	0	-	0	-	0	-	0	-	-	-	-	-	-	-	-	-	-	-	-	-	-	-	-	-	-	-	-	-	-	-	-	-
KPN166	plasmid_AA941	unknown		1	9371	9371	9371	no	N50	NA	0	0	0	0	-	0	-	0	-	0	-	0	-	0	-	-	-	-	-	-	-	-	-	-	-	-	-	-	-	-	-	-	-	-	-	-	-	-	-
KPN18	plasmid_AA941	unknown		2	9421	9421	11118	no	N50	NA	0	0	0	0	-	0	-	0	-	0	-	0	-	0	-	-	-	-	-	-	-	-	-	-	-	-	-	-	-	-	-	-	-	-	-	-	-	-	-
KPN25	plasmid_AA941	unknown		1	9421	9421	9421	no	N50	NA	0	0	0	0	-	0	-	0	-	0	-	0	-	0	-	-	-	-	-	-	-	-	-	-	-	-	-	-	-	-	-	-	-	-	-	-	-	-	-
KPN35	plasmid_AA941	unknown		1	9371	9371	9371	no	N50	NA	0	0	0	0	-	0	-	0	-	0	-	0	-	0	-	-	-	-	-	-	-	-	-	-	-	-	-	-	-	-	-	-	-	-	-	-	-	-	-
KPN55	plasmid_AA941	unknown		1	9371	9371	9371	no	N50	NA	0	0	0	0	-	0	-	0	-	0	-	0	-	0	-	-	-	-	-	-	-	-	-	-	-	-	-	-	-	-	-	-	-	-	-	-	-	-	-
KPN69	plasmid_AA941	unknown		1	8729	8729	8729	no	N50	NA	0	0	0	0	-	0	-	0	-	0	-	0	-	0	-	-	-	-	-	-	-	-	-	-	-	-	-	-	-	-	-	-	-	-	-	-	-	-	-
KPN70	plasmid_AA941	unknown		1	8729	8729	8729	no	N50	NA	0	0	0	0	-	0	-	0	-	0	-	0	-	0	-	-	-	-	-	-	-	-	-	-	-	-	-	-	-	-	-	-	-	-	-	-	-	-	-
KPN81	plasmid_AA941	unknown		1	9371	9371	9371	no	N50	NA	0	0	0	0	-	0	-	0	-	0	-	0	-	0	-	-	-	-	-	-	-	-	-	-	-	-	-	-	-	-	-	-	-	-	-	-	-	-	-
KPN88	plasmid_AA941	unknown		1	8020	8020	8020	no	N50	NA	0	0	0	0	-	0	-	0	-	0	-	0	-	0	-	-	-	-	-	-	-	-	-	-	-	-	-	-	-	-	-	-	-	-	-	-	-	-	-
KPN23	plasmid_AA942	unknown		1	10137	10137	10137	no	-	NA	0	0	0	0	-	0	-	0	-	0	-	0	-	0	-	-	-	-	-	-	-	-	-	-	-	-	-	-	-	-	-	-	-	-	-	-	-	-	-
KPN35	plasmid_AA942	unknown		1	1914	1914	1914	no	N50	NA	0	0	0	0	-	0	-	0	-	0	-	0	-	0	-	-	-	-	-	-	-	-	-	-	-	-	-	-	-	-	-	-	-	-	-	-	-	-	-
KPN69	plasmid_AA942	unknown		1	1895	1895	1895	no	N50	NA	0	0	0	0	-	0	-	0	-	0	-	0	-	0	-	-	-	-	-	-	-	-	-	-	-	-	-	-	-	-	-	-	-	-	-	-	-	-	-
KPN168	plasmid_AA945	unknown		1	8359	8359	8359	no	N50	NA	0	0	0	0	-	0	-	0	-	0	-	0	-	0	-	-	-	-	-	-	-	-	-	-	-	-	-	-	-	-	-	-	-	-	-	-	-	-	-
KPN139	plasmid_AA964	unknown		4	11024	12350	30862	no	-	NA	0	0	0	0	-	0	-	0	-	0	-	0	-	0	-	-	-	-	-	-	-	-	-	-	-	-	-	-	-	-	-	-	-	-	-	-	-	-	-
KPN152	plasmid_AA964	unknown		2	50440	50440	72602	no	-	NA	0	0	0	0	-	0	-	0	-	0	-	0	-	0	-	-	-	-	-	-	-	-	-	-	-	-	-	-	-	-	-	-	-	-	-	-	-	-	-
KPN141	plasmid_AA966	unknown		1	63826	63826	63826	no	-	NA	0	0	0	0	-	0	-	0	-	0	-	0	-	0	-	-	-	-	-	-	-	-	-	-	-	-	-	-	-	-	-	-	-	-	-	-	-	-	-
KPN85	plasmid_AA966	unknown		5	46720	46720	80895	no	-	NA	0	0	5	5	-	0	-	0	-	0	-	0	-	0	-	-	-	-	-	-	qnrS1	-	-	-	-	sul2	tet(A).v1	-	dfrA14.v2*	LAP-2	-	-	-	-	-	-	-	-	-
KPN139	plasmid_AB036	unknown		1	2656	2656	2656	no	N50	NA	0	0	0	0	-	0	-	0	-	0	-	0	-	0	-	-	-	-	-	-	-	-	-	-	-	-	-	-	-	-	-	-	-	-	-	-	-	-	-
KPN141	plasmid_AB040	unknown		1	2572	2572	2572	no	N50	NA	0	0	0	0	-	0	-	0	-	0	-	0	-	0	-	-	-	-	-	-	-	-	-	-	-	-	-	-	-	-	-	-	-	-	-	-	-	-	-
KPN152	plasmid_AB040	unknown		1	2573	2573	2573	no	N50	NA	0	0	0	0	-	0	-	0	-	0	-	0	-	0	-	-	-	-	-	-	-	-	-	-	-	-	-	-	-	-	-	-	-	-	-	-	-	-	-
KPN158	plasmid_AB040	unknown		1	2572	2572	2572	no	N50	NA	0	0	0	0	-	0	-	0	-	0	-	0	-	0	-	-	-	-	-	-	-	-	-	-	-	-	-	-	-	-	-	-	-	-	-	-	-	-	-
KPN167	plasmid_AB040	unknown		1	2512	2512	2512	no	N50	NA	0	0	0	0	-	0	-	0	-	0	-	0	-	0	-	-	-	-	-	-	-	-	-	-	-	-	-	-	-	-	-	-	-	-	-	-	-	-	-
KPN139	plasmid_AB041	unknown		1	2507	2507	2507	no	N50	NA	0	0	0	0	-	0	-	0	-	0	-	0	-	0	-	-	-	-	-	-	-	-	-	-	-	-	-	-	-	-	-	-	-	-	-	-	-	-	-
KPN141	plasmid_AB041	unknown		1	2294	2294	2294	no	N50	NA	0	0	0	0	-	0	-	0	-	0	-	0	-	0	-	-	-	-	-	-	-	-	-	-	-	-	-	-	-	-	-	-	-	-	-	-	-	-	-
KPN100	plasmid_AB043	unknown		1	2044	2044	2044	no	N50	NA	0	0	0	0	-	0	-	0	-	0	-	0	-	0	-	-	-	-	-	-	-	-	-	-	-	-	-	-	-	-	-	-	-	-	-	-	-	-	-
KPN139	plasmid_AB045	unknown		1	3501	3501	3501	no	N50	NA	0	0	0	0	-	0	-	0	-	0	-	0	-	0	-	-	-	-	-	-	-	-	-	-	-	-	-	-	-	-	-	-	-	-	-	-	-	-	-
KPN44	plasmid_AB045	unknown		1	3824	3824	3824	no	N50	NA	0	0	0	0	-	0	-	0	-	0	-	0	-	0	-	-	-	-	-	-	-	-	-	-	-	-	-	-	-	-	-	-	-	-	-	-	-	-	-
KPN80	plasmid_AB047	unknown		1	6650	6650	6650	no	N50	NA	0	0	0	0	-	0	-	0	-	0	-	0	-	0	-	-	-	-	-	-	-	-	-	-	-	-	-	-	-	-	-	-	-	-	-	-	-	-	-
KPN131	plasmid_AB048	unknown		1	4515	4515	4515	no	N50	NA	0	0	0	0	-	0	-	0	-	0	-	0	-	0	-	-	-	-	-	-	-	-	-	-	-	-	-	-	-	-	-	-	-	-	-	-	-	-	-
KPN157	plasmid_AB049	unknown		1	3953	3953	3953	no	N50	NA	0	0	0	0	-	0	-	0	-	0	-	0	-	0	-	-	-	-	-	-	-	-	-	-	-	-	-	-	-	-	-	-	-	-	-	-	-	-	-
KPN106	plasmid_AB050	unknown		1	4743	4743	4743	no	N50	NA	0	0	0	0	-	0	-	0	-	0	-	0	-	0	-	-	-	-	-	-	-	-	-	-	-	-	-	-	-	-	-	-	-	-	-	-	-	-	-
KPN53	plasmid_AB054	unknown		2	1121	1121	2217	no	N50	NA	0	0	0	0	-	0	-	0	-	0	-	0	-	0	-	-	-	-	-	-	-	-	-	-	-	-	-	-	-	-	-	-	-	-	-	-	-	-	-
KPN73	plasmid_AB058	unknown		1	4137	4137	4137	no	N50	NA	0	0	0	0	-	0	-	0	-	0	-	0	-	0	-	-	-	-	-	-	-	-	-	-	-	-	-	-	-	-	-	-	-	-	-	-	-	-	-
KPN123	plasmid_AB071	unknown		1	1989	1989	1989	no	N50	NA	0	0	0	0	-	0	-	0	-	0	-	0	-	0	-	-	-	-	-	-	-	-	-	-	-	-	-	-	-	-	-	-	-	-	-	-	-	-	-
KPN093	plasmid_AB181	unknown		16	7978	17730	73207	no	N50	NA	0	0	0	0	-	0	-	0	-	0	-	0	-	0	-	-	-	-	-	-	-	-	-	-	-	-	-	-	-	-	-	-	-	-	-	-	-	-	-
KPN120	plasmid_AB181	unknown		6	8308	20681	41596	no	N50	NA	0	0	0	0	-	0	-	0	-	0	-	0	-	0	-	-	-	-	-	-	-	-	-	-	-	-	-	-	-	-	-	-	-	-	-	-	-	-	-
KPN83	plasmid_AB181	unknown		16	7878	11884	69538	no	N50	NA	0	0	0	0	-	0	-	0	-	0	-	0	-	0	-	-	-	-	-	-	-	-	-	-	-	-	-	-	-	-	-	-	-	-	-	-	-	-	-
KPN146	plasmid_AB183	unknown		6	18933	24323	62253	no	-	NA	0	0	0	0	-	0	-	0	-	0	-	0	-	0	-	-	-	-	-	-	-	-	-	-	-	-	-	-	-	-	-	-	-	-	-	-	-	-	-
KPN36	plasmid_AB183	unknown		1	51239	51239	51239	no	-	NA	0	0	1	2	-	0	-	0	-	0	-	0	-	0	-	-	-	strA.v1;strB.v1	-	-	-	-	-	-	-	-	-	-	-	-	-	-	-	-	-	-	-	-	-
KPN24	plasmid_AB186	unknown		2	27383	27383	28486	no	-	NA	0	0	0	0	-	0	-	0	-	0	-	0	-	0	-	-	-	-	-	-	-	-	-	-	-	-	-	-	-	-	-	-	-	-	-	-	-	-	-
KPN157	plasmid_AB189	unknown		4	5198	6307	18306	no	N50	NA	0	0	0	0	-	0	-	0	-	0	-	0	-	0	-	-	-	-	-	-	-	-	-	-	-	-	-	-	-	-	-	-	-	-	-	-	-	-	-
KPN88	plasmid_AB189	unknown		4	4586	6748	14053	no	N50	NA	0	0	0	0	-	0	-	0	-	0	-	0	-	0	-	-	-	-	-	-	-	-	-	-	-	-	-	-	-	-	-	-	-	-	-	-	-	-	-
KPN103	plasmid_AB192	unknown		2	13332	13332	14684	no	-	NA	0	0	0	0	-	0	-	0	-	0	-	0	-	0	-	-	-	-	-	-	-	-	-	-	-	-	-	-	-	-	-	-	-	-	-	-	-	-	-
KPN121	plasmid_AB193	unknown		4	18360	18360	25332	no	-	NA	0	0	4	4	-	0	-	0	-	0	-	0	-	0	-	-	-	aadA2^	-	-	-	-	-	-	-	sul1*	tet(A).v1	-	dfrA12	-	-	-	-	-	-	-	-	-	-
KPN39	plasmid_AB193	unknown		2	25988	25988	30298	no	-	NA	0	0	2	2	-	0	-	0	-	0	-	0	-	0	-	-	-	-	-	-	-	-	mphA	-	-	-	tet(A).v1	-	-	-	-	-	-	-	-	-	-	-	-
KPN126	plasmid_AB194	unknown		1	21608	21608	21608	no	-	NA	0	0	0	0	-	0	-	0	-	0	-	0	-	0	-	-	-	-	-	-	-	-	-	-	-	-	-	-	-	-	-	-	-	-	-	-	-	-	-
KPN143	plasmid_AB194	unknown		1	21557	21557	21557	no	-	NA	0	0	0	0	-	0	-	0	-	0	-	0	-	0	-	-	-	-	-	-	-	-	-	-	-	-	-	-	-	-	-	-	-	-	-	-	-	-	-
KPN53	plasmid_AB196	unknown		1	16312	16312	16312	no	-	NA	0	0	0	0	-	0	-	0	-	0	-	0	-	0	-	-	-	-	-	-	-	-	-	-	-	-	-	-	-	-	-	-	-	-	-	-	-	-	-
KPN132	plasmid_AB235	unknown		1	2011	2011	2011	no	N50	NA	0	0	0	0	-	0	-	0	-	0	-	0	-	0	-	-	-	-	-	-	-	-	-	-	-	-	-	-	-	-	-	-	-	-	-	-	-	-	-
KPN39	plasmid_AB236	unknown		1	2135	2135	2135	no	N50	NA	0	0	0	0	-	0	-	0	-	0	-	0	-	0	-	-	-	-	-	-	-	-	-	-	-	-	-	-	-	-	-	-	-	-	-	-	-	-	-
KPN122	plasmid_AB237	unknown		1	1825	1825	1825	no	N50	NA	0	0	0	0	-	0	-	0	-	0	-	0	-	0	-	-	-	-	-	-	-	-	-	-	-	-	-	-	-	-	-	-	-	-	-	-	-	-	-
KPN142	plasmid_AB237	unknown		1	1825	1825	1825	no	N50	NA	0	0	0	0	-	0	-	0	-	0	-	0	-	0	-	-	-	-	-	-	-	-	-	-	-	-	-	-	-	-	-	-	-	-	-	-	-	-	-
KPN095	plasmid_AB531	unknown		2	34554	34554	56282	no	-	NA	0	0	0	0	-	0	-	0	-	0	-	0	-	0	-	-	-	-	-	-	-	-	-	-	-	-	-	-	-	-	-	-	-	-	-	-	-	-	-
KPN150	plasmid_AB531	unknown		1	54636	54636	54636	no	-	NA	0	0	0	0	-	0	-	0	-	0	-	0	-	0	-	-	-	-	-	-	-	-	-	-	-	-	-	-	-	-	-	-	-	-	-	-	-	-	-
KPN174	plasmid_AB531	unknown		4	24991	24991	31069	no	-	NA	0	0	0	0	-	0	-	0	-	0	-	0	-	0	-	-	-	-	-	-	-	-	-	-	-	-	-	-	-	-	-	-	-	-	-	-	-	-	-
KPN69	plasmid_AB531	unknown		3	34543	34543	57469	no	-	NA	0	0	0	0	-	0	-	0	-	0	-	0	-	0	-	-	-	-	-	-	-	-	-	-	-	-	-	-	-	-	-	-	-	-	-	-	-	-	-
KPN70	plasmid_AB531	unknown		3	34553	34553	57489	no	-	NA	0	0	0	0	-	0	-	0	-	0	-	0	-	0	-	-	-	-	-	-	-	-	-	-	-	-	-	-	-	-	-	-	-	-	-	-	-	-	-
KPN84	plasmid_AB531	unknown		1	54390	54390	54390	no	-	NA	0	0	0	0	-	0	-	0	-	0	-	0	-	0	-	-	-	-	-	-	-	-	-	-	-	-	-	-	-	-	-	-	-	-	-	-	-	-	-
KPN35	plasmid_AB536	unknown		1	31888	31888	31888	no	-	NA	0	0	0	0	-	0	-	0	-	0	-	0	-	0	-	-	-	-	-	-	-	-	-	-	-	-	-	-	-	-	-	-	-	-	-	-	-	-	-
KPN130	plasmid_AB595	unknown		2	7790	7790	9190	no	N50	NA	0	0	2	2	-	0	-	0	-	0	-	0	-	0	-	-	-	-	-	-	-	-	-	-	-	sul2	-	-	dfrA18*	-	-	-	-	-	-	-	-	-	-
KPN146	plasmid_AB595	unknown		1	6288	6288	6288	no	N50	NA	0	0	2	3	-	0	-	0	-	0	-	0	-	0	-	-	-	strA.v1^;strB.v1	-	-	-	-	-	-	-	sul2	-	-	-	-	-	-	-	-	-	-	-	-	-
KPN28	plasmid_AB595	unknown		2	6300	6300	7745	no	N50	NA	0	0	3	3	-	0	-	0	-	0	-	0	-	0	-	-	-	-	-	-	-	-	-	-	-	sul2	-	-	dfrA26	TEM-1D.v1^	-	-	-	-	-	-	-	-	-
KPN39	plasmid_AB595	unknown		3	2514	3869	8097	no	N50	NA	0	0	3	5	-	0	-	0	-	0	-	0	-	0	-	-	-	aadA2*?;strA.v1^;strB.v1*	-	-	-	-	-	-	-	sul2	-	-	dfrA12	-	-	-	-	-	-	-	-	-	-
KPN50	plasmid_AB595	unknown		1	15339	15339	15339	no	-	NA	0	0	2	2	-	0	-	0	-	0	-	0	-	0	-	-	-	-	-	-	-	-	-	-	-	sul2	-	-	dfrA26	-	-	-	-	-	-	-	-	-	-
KPN132	plasmid_AB685	unknown		1	1626	1626	1626	no	N50	NA	0	0	0	0	-	0	-	0	-	0	-	0	-	0	-	-	-	-	-	-	-	-	-	-	-	-	-	-	-	-	-	-	-	-	-	-	-	-	-
KPN41	plasmid_AB687	unknown		1	1583	1583	1583	no	N50	NA	0	0	0	0	-	0	-	0	-	0	-	0	-	0	-	-	-	-	-	-	-	-	-	-	-	-	-	-	-	-	-	-	-	-	-	-	-	-	-
KPN49	plasmid_AB750	unknown		2	5001	5001	6563	no	N50	NA	0	0	0	0	-	0	-	0	-	0	-	0	-	0	-	-	-	-	-	-	-	-	-	-	-	-	-	-	-	-	-	-	-	-	-	-	-	-	-
KPN124	plasmid_AB978	unknown		2	33648	33648	43019	no	-	NA	0	0	1	1	-	0	-	0	-	0	-	0	-	0	-	-	-	-	-	-	-	-	-	-	-	-	-	-	-	TEM-1D.v1^	-	-	-	-	-	-	-	-	-
KPN115	plasmid_AC125	unknown		2	111073	111073	113527	no	-	NA	0	0	0	0	-	0	-	0	-	0	-	0	-	0	-	-	-	-	-	-	-	-	-	-	-	-	-	-	-	-	-	-	-	-	-	-	-	-	-
KPN116	plasmid_AC125	unknown		1	109864	109864	109864	no	-	NA	0	0	0	0	-	0	-	0	-	0	-	0	-	0	-	-	-	-	-	-	-	-	-	-	-	-	-	-	-	-	-	-	-	-	-	-	-	-	-
KPN118	plasmid_AC125	unknown		3	110022	110022	112683	no	-	NA	0	0	0	0	-	0	-	0	-	0	-	0	-	0	-	-	-	-	-	-	-	-	-	-	-	-	-	-	-	-	-	-	-	-	-	-	-	-	-
KPN144	plasmid_AC125	unknown		1	109778	109778	109778	no	-	NA	0	0	0	0	-	0	-	0	-	0	-	0	-	0	-	-	-	-	-	-	-	-	-	-	-	-	-	-	-	-	-	-	-	-	-	-	-	-	-
KPN170	plasmid_AC125	unknown		1	110990	110990	110990	no	-	NA	0	0	0	0	-	0	-	0	-	0	-	0	-	0	-	-	-	-	-	-	-	-	-	-	-	-	-	-	-	-	-	-	-	-	-	-	-	-	-
KPN174	plasmid_AC125	unknown		3	60786	60786	111301	no	-	NA	0	0	0	0	-	0	-	0	-	0	-	0	-	0	-	-	-	-	-	-	-	-	-	-	-	-	-	-	-	-	-	-	-	-	-	-	-	-	-
KPN178	plasmid_AC125	unknown		1	109286	109286	109286	no	-	NA	0	0	0	0	-	0	-	0	-	0	-	0	-	0	-	-	-	-	-	-	-	-	-	-	-	-	-	-	-	-	-	-	-	-	-	-	-	-	-
KPN25	plasmid_AC125	unknown		1	111487	111487	111487	no	-	NA	0	0	1	1	-	0	-	0	-	0	-	0	-	0	-	-	-	-	-	-	-	-	-	-	-	-	-	-	-	TEM-1D.v1^	-	-	-	-	-	-	-	-	-
KPN42	plasmid_AC125	unknown		3	68033	68033	112609	no	-	NA	0	0	0	0	-	0	-	0	-	0	-	0	-	0	-	-	-	-	-	-	-	-	-	-	-	-	-	-	-	-	-	-	-	-	-	-	-	-	-
KPN43	plasmid_AC125	unknown		3	68033	68033	112610	no	-	NA	0	0	0	0	-	0	-	0	-	0	-	0	-	0	-	-	-	-	-	-	-	-	-	-	-	-	-	-	-	-	-	-	-	-	-	-	-	-	-
KPN85	plasmid_AC125	unknown		2	70998	70998	110256	no	-	NA	0	0	0	0	-	0	-	0	-	0	-	0	-	0	-	-	-	-	-	-	-	-	-	-	-	-	-	-	-	-	-	-	-	-	-	-	-	-	-
KPN117	plasmid_AC247	unknown		2	13695	13695	18237	no	-	NA	0	0	2	2	-	0	-	0	-	0	-	0	-	0	-	-	-	-	-	-	qnrB1.v2^	-	-	-	-	-	tet(A).v1	-	-	-	-	-	-	-	-	-	-	-	-
KPN132	plasmid_AC249	unknown		2	6112	6112	7557	no	N50	NA	0	0	1	1	-	0	-	0	-	0	-	0	-	0	-	-	-	-	-	-	-	-	mphA	-	-	-	-	-	-	-	-	-	-	-	-	-	-	-	-
KPN53	plasmid_AC288	unknown		2	7673	7673	9440	no	N50	NA	0	0	3	3	-	0	-	0	-	0	-	0	-	0	-	-	-	-	-	-	qnrB4	-	-	-	-	sul1	-	-	-	DHA-1	-	-	-	-	-	-	-	-	-
KPN140	plasmid_AC411	unknown		1	8977	8977	8977	no	N50	NA	0	0	1	3	-	0	-	0	-	0	-	0	-	0	-	-	-	aph(3')-Ia*;strA.v1;strB.v1*	-	-	-	-	-	-	-	-	-	-	-	-	-	-	-	-	-	-	-	-	-
KPN73	plasmid_AC431	unknown		2	9377	9377	10579	no	N50	NA	0	0	0	0	-	0	-	0	-	0	-	0	-	0	-	-	-	-	-	-	-	-	-	-	-	-	-	-	-	-	-	-	-	-	-	-	-	-	-
KPN120	plasmid_AC434	unknown		4	10233	10233	14027	no	-	NA	0	0	0	0	-	0	-	0	-	0	-	0	-	0	-	-	-	-	-	-	-	-	-	-	-	-	-	-	-	-	-	-	-	-	-	-	-	-	-
KPN53	plasmid_AC434	unknown		3	10817	10817	20654	no	-	NA	0	0	1	2	-	0	-	0	-	0	-	0	-	0	-	-	-	strA.v1;strB.v1	-	-	-	-	-	-	-	-	-	-	-	-	-	-	-	-	-	-	-	-	-
KPN40	plasmid_AC435	unknown		5	19550	19550	34300	no	-	NA	0	0	0	0	-	0	-	0	-	0	-	0	-	0	-	-	-	-	-	-	-	-	-	-	-	-	-	-	-	-	-	-	-	-	-	-	-	-	-
KPN73	plasmid_AC530	unknown		1	2149	2149	2149	no	N50	NA	0	0	0	0	-	0	-	0	-	0	-	0	-	0	-	-	-	-	-	-	-	-	-	-	-	-	-	-	-	-	-	-	-	-	-	-	-	-	-
KPN094	plasmid_AC748	unknown		1	2228	2228	2228	no	N50	NA	0	0	0	0	-	0	-	0	-	0	-	0	-	0	-	-	-	-	-	-	-	-	-	-	-	-	-	-	-	-	-	-	-	-	-	-	-	-	-
KPN157	plasmid_AC776	unknown		2	5614	5614	8070	no	N50	NA	0	0	1	1	-	0	-	0	-	0	-	0	-	0	-	-	-	-	-	-	qnrB1.v1	-	-	-	-	-	-	-	-	-	-	-	-	-	-	-	-	-	-
KPN151	plasmid_AC978	unknown		1	53210	53210	53210	no	-	NA	0	0	0	0	-	0	-	0	-	0	-	0	-	0	-	-	-	-	-	-	-	-	-	-	-	-	-	-	-	-	-	-	-	-	-	-	-	-	-
KPN166	plasmid_AC978	unknown		1	53210	53210	53210	no	-	NA	0	0	0	0	-	0	-	0	-	0	-	0	-	0	-	-	-	-	-	-	-	-	-	-	-	-	-	-	-	-	-	-	-	-	-	-	-	-	-
KPN170	plasmid_AD092	unknown		1	1333	1333	1333	no	N50	NA	0	0	1	1	-	0	-	0	-	0	-	0	-	0	-	-	-	-	-	-	-	-	-	-	-	-	-	-	dfrA8	-	-	-	-	-	-	-	-	-	-
KPN104	plasmid_AD094	unknown		3	7106	7106	9738	no	N50	NA	0	0	0	0	-	0	-	0	-	0	-	0	-	0	-	-	-	-	-	-	-	-	-	-	-	-	-	-	-	-	-	-	-	-	-	-	-	-	-
KPN33	plasmid_AD094	unknown		4	14478	14478	28556	no	-	NA	0	0	0	0	-	0	-	0	-	0	-	0	-	0	-	-	-	-	-	-	-	-	-	-	-	-	-	-	-	-	-	-	-	-	SHV-1^	-	-	-	-
KPN34	plasmid_AD094	unknown		4	14373	14373	28545	no	-	NA	0	0	0	0	-	0	-	0	-	0	-	0	-	0	-	-	-	-	-	-	-	-	-	-	-	-	-	-	-	-	-	-	-	-	SHV-1^	-	-	-	-
KPN41	plasmid_AD094	unknown		1	7997	7997	7997	no	N50	NA	0	0	0	0	-	0	-	0	-	0	-	0	-	0	-	-	-	-	-	-	-	-	-	-	-	-	-	-	-	-	-	-	-	-	SHV-1^	-	-	-	-
KPN88	plasmid_AD094	unknown		2	4906	4906	8103	no	N50	NA	0	0	0	0	-	0	-	0	-	0	-	0	-	0	-	-	-	-	-	-	-	-	-	-	-	-	-	-	-	-	-	-	-	-	SHV-11.v1	35Q	-	-	-
KPN100	plasmid_AD306	unknown		1	31707	31707	31707	no	-	NA	0	0	0	0	-	0	-	0	-	0	-	0	-	0	-	-	-	-	-	-	-	-	-	-	-	-	-	-	-	-	-	-	-	-	-	-	-	-	-
KPN123	plasmid_AD306	unknown		1	25266	25266	25266	no	-	NA	0	0	0	0	-	0	-	0	-	0	-	0	-	0	-	-	-	-	-	-	-	-	-	-	-	-	-	-	-	-	-	-	-	-	-	-	-	-	-
KPN39	plasmid_AD312	unknown		1	6655	6655	6655	no	N50	NA	0	0	1	1	-	0	-	0	-	0	-	0	-	0	-	-	-	-	-	-	-	-	-	floR.v1*	-	-	-	-	-	-	-	-	-	-	-	-	-	-	-
KPN131	plasmid_AD338	unknown		1	4909	4909	4909	no	N50	NA	0	0	0	0	-	0	-	0	-	0	-	0	-	0	-	-	-	-	-	-	-	-	-	-	-	-	-	-	-	-	-	-	-	-	-	-	-	-	-
KPN139	plasmid_AD338	unknown		1	5752	5752	5752	no	N50	NA	0	0	0	0	-	0	-	0	-	0	-	0	-	0	-	-	-	-	-	-	-	-	-	-	-	-	-	-	-	-	-	-	-	-	-	-	-	-	-
KPN158	plasmid_AD338	unknown		1	4983	4983	4983	no	N50	NA	0	0	0	0	-	0	-	0	-	0	-	0	-	0	-	-	-	-	-	-	-	-	-	-	-	-	-	-	-	-	-	-	-	-	-	-	-	-	-
KPN22	plasmid_AD338	unknown		1	4448	4448	4448	no	N50	NA	0	0	0	0	-	0	-	0	-	0	-	0	-	0	-	-	-	-	-	-	-	-	-	-	-	-	-	-	-	-	-	-	-	-	-	-	-	-	-
KPN89	plasmid_AD338	unknown		1	4909	4909	4909	no	N50	NA	0	0	0	0	-	0	-	0	-	0	-	0	-	0	-	-	-	-	-	-	-	-	-	-	-	-	-	-	-	-	-	-	-	-	-	-	-	-	-
KPN8	plasmid_AD338	unknown		1	4909	4909	4909	no	N50	NA	0	0	0	0	-	0	-	0	-	0	-	0	-	0	-	-	-	-	-	-	-	-	-	-	-	-	-	-	-	-	-	-	-	-	-	-	-	-	-
KPN167	plasmid_AD441	unknown		2	28618	28618	29755	no	-	NA	0	0	0	0	-	0	-	0	-	0	-	0	-	0	-	-	-	-	-	-	-	-	-	-	-	-	-	-	-	-	-	-	-	-	-	-	-	-	-
KPN123	plasmid_AD442	unknown		1	20695	20695	20695	no	-	NA	0	0	0	0	-	0	-	0	-	0	-	0	-	0	-	-	-	-	-	-	-	-	-	-	-	-	-	-	-	-	-	-	-	-	-	-	-	-	-
KPN24	plasmid_AD442	unknown		4	32090	32090	51873	no	-	NA	0	0	0	0	-	0	-	0	-	0	-	0	-	0	-	-	-	-	-	-	-	-	-	-	-	-	-	-	-	-	-	-	-	-	-	-	-	-	-
KPN125	plasmid_AD443	unknown		9	11387	24510	65826	no	-	NA	0	0	0	0	-	0	-	0	-	0	-	0	-	0	-	-	-	-	-	-	-	-	-	-	-	-	-	-	-	-	-	-	-	-	-	-	-	-	-
KPN128	plasmid_AD443	unknown		11	16835	24738	106137	no	-	NA	0	0	0	0	-	0	-	0	-	0	-	0	-	0	-	-	-	-	-	-	-	-	-	-	-	-	-	-	-	-	-	-	-	-	-	-	-	-	-
KPN130	plasmid_AD443	unknown		15	13588	27100	124631	no	-	NA	0	0	0	0	-	0	-	0	-	0	-	0	-	0	-	-	-	-	-	-	-	-	-	-	-	-	-	-	-	-	-	-	-	-	-	-	-	-	-
KPN135	plasmid_AD443	unknown		10	24403	37389	162730	no	-	NA	0	0	0	0	-	0	-	0	-	0	-	0	-	0	-	-	-	-	-	-	-	-	-	-	-	-	-	-	-	-	-	-	-	-	-	-	-	-	-
KPN138	plasmid_AD443	unknown		13	11614	27100	114723	no	-	NA	0	0	0	0	-	0	-	0	-	0	-	0	-	0	-	-	-	-	-	-	-	-	-	-	-	-	-	-	-	-	-	-	-	-	-	-	-	-	-
KPN146	plasmid_AD443	unknown		17	10193	24181	110919	no	-	NA	0	0	0	0	-	0	-	0	-	0	-	0	-	0	-	-	-	-	-	-	-	-	-	-	-	-	-	-	-	-	-	-	-	-	-	-	-	-	-
KPN161	plasmid_AD443	unknown		7	36649	36649	67479	no	-	NA	0	0	0	0	-	0	-	0	-	0	-	0	-	0	-	-	-	-	-	-	-	-	-	-	-	-	-	-	-	-	-	-	-	-	-	-	-	-	-
KPN162	plasmid_AD443	unknown		17	14211	30142	145985	no	-	NA	0	0	0	0	-	0	-	0	-	0	-	0	-	0	-	-	-	-	-	-	-	-	-	-	-	-	-	-	-	-	-	-	-	-	-	-	-	-	-
KPN176	plasmid_AD443	unknown		7	25050	47596	111504	no	-	NA	0	0	0	0	-	0	-	0	-	0	-	0	-	0	-	-	-	-	-	-	-	-	-	-	-	-	-	-	-	-	-	-	-	-	-	-	-	-	-
KPN28	plasmid_AD443	unknown		14	14144	24750	134339	yes (1)	ambiguous_bases	NA	0	0	0	0	-	0	-	0	-	0	-	0	-	0	-	-	-	-	-	-	-	-	-	-	-	-	-	-	-	-	-	-	-	-	-	-	-	-	-
KPN50	plasmid_AD443	unknown		13	19726	29288	137270	no	-	NA	0	0	0	0	-	0	-	0	-	0	-	0	-	0	-	-	-	-	-	-	-	-	-	-	-	-	-	-	-	-	-	-	-	-	-	-	-	-	-
KPN85	plasmid_AD443	unknown		9	19528	24727	87626	no	-	NA	0	0	0	0	-	0	-	0	-	0	-	0	-	0	-	-	-	-	-	-	-	-	-	-	-	-	-	-	-	-	-	-	-	-	SHV-1	-	-	-	-
KPN122	plasmid_AD465	unknown		1	2124	2124	2124	no	N50	NA	0	0	0	0	-	0	-	0	-	0	-	0	-	0	-	-	-	-	-	-	-	-	-	-	-	-	-	-	-	-	-	-	-	-	-	-	-	-	-
KPN119	plasmid_AD548	unknown		1	11369	11369	11369	no	-	NA	0	0	0	0	-	0	-	0	-	0	-	0	-	0	-	-	-	-	-	-	-	-	-	-	-	-	-	-	-	-	-	-	-	-	-	-	-	-	-
KPN120	plasmid_AD548	unknown		1	12037	12037	12037	no	-	NA	0	0	0	0	-	0	-	0	-	0	-	0	-	0	-	-	-	-	-	-	-	-	-	-	-	-	-	-	-	-	-	-	-	-	-	-	-	-	-
KPN3	plasmid_AD548	unknown		11	7901	18639	60257	no	N50	NA	0	0	1	1	-	0	-	0	-	0	-	0	-	0	-	-	-	-	-	-	-	-	-	-	-	-	-	-	dfrA14.v2*	-	-	-	-	-	-	-	-	-	-
KPN80	plasmid_AD982	unknown		1	9321	9321	9321	no	N50	NA	0	0	0	0	-	0	-	0	-	0	-	0	-	0	-	-	-	-	-	-	-	-	-	-	-	-	-	-	-	-	-	-	-	-	-	-	-	-	-
KPN35	plasmid_AD996	unknown		1	3938	3938	3938	no	N50	NA	0	0	0	0	-	0	-	0	-	0	-	0	-	0	-	-	-	-	-	-	-	-	-	-	-	-	-	-	-	-	-	-	-	-	-	-	-	-	-
KPN148	plasmid_AE105	unknown		2	74121	74121	75153	no	-	NA	0	0	0	0	-	0	-	0	-	0	-	0	-	0	-	-	-	-	-	-	-	-	-	-	-	-	-	-	-	-	-	-	-	-	-	-	-	-	-
KPN126	plasmid_AE437	unknown		16	56906	74790	208005	no	-	NA	1	0	0	0	ybt 4; plasmid	221-3LV	-	0	-	0	-	0	-	0	-	-	-	-	-	-	-	-	-	-	-	-	-	-	-	-	-	-	-	-	-	-	-	-	-
KPN150	plasmid_AE437	unknown		11	51407	74575	187372	no	-	NA	1	0	0	0	ybt 4; plasmid	65	-	0	-	0	-	0	-	0	-	-	-	-	-	-	-	-	-	-	-	-	-	-	-	-	-	-	-	-	-	-	-	-	-
KPN164	plasmid_AE437	unknown		14	149350	149350	280564	no	-	NA	1	0	0	0	ybt 4; plasmid	221-3LV	-	0	-	0	-	0	-	0	-	-	-	-	-	-	-	-	-	-	-	-	-	-	-	-	-	-	-	-	-	-	-	-	-
KPN177	plasmid_AE437	unknown		7	100158	100158	144298	no	-	NA	1	0	0	0	ybt 4; plasmid	37-2LV	-	0	-	0	-	0	-	0	-	-	-	-	-	-	-	-	-	-	-	-	-	-	-	-	-	-	-	-	-	-	-	-	-
KPN87	plasmid_AE437	unknown		10	83413	83413	118743	no	-	NA	1	0	0	0	ybt 4; plasmid	65-1LV	-	0	-	0	-	0	-	0	-	-	-	-	-	-	-	-	-	-	-	-	-	-	-	-	-	-	-	-	-	-	-	-	-
KPN176	plasmid_AE480	unknown		1	2014	2014	2014	no	N50	NA	0	0	0	0	-	0	-	0	-	0	-	0	-	0	-	-	-	-	-	-	-	-	-	-	-	-	-	-	-	-	-	-	-	-	-	-	-	-	-
KPN152	plasmid_AF031	unknown		3	112459	112459	125700	no	-	NA	0	0	0	0	-	0	-	0	-	0	-	0	-	0	-	-	-	-	-	-	-	-	-	-	-	-	-	-	-	-	-	-	-	-	-	-	-	-	-
KPN118	plasmid_AF460	unknown		2	46535	46535	47851	no	-	NA	0	0	0	0	-	0	-	0	-	0	-	0	-	0	-	-	-	-	-	-	-	-	-	-	-	-	-	-	-	-	-	-	-	-	-	-	-	-	-
KPN126	plasmid_AF460	unknown		2	30687	30687	31688	no	-	NA	0	0	0	0	-	0	-	0	-	0	-	0	-	0	-	-	-	-	-	-	-	-	-	-	-	-	-	-	-	-	-	-	-	-	-	-	-	-	-
KPN150	plasmid_AF460	unknown		3	32595	32595	41385	no	-	NA	0	0	0	0	-	0	-	0	-	0	-	0	-	0	-	-	-	-	-	-	-	-	-	-	-	-	-	-	-	-	-	-	-	-	-	-	-	-	-
KPN164	plasmid_AF460	unknown		3	30687	30687	60341	no	-	NA	0	0	0	0	-	0	-	0	-	0	-	0	-	0	-	-	-	-	-	-	-	-	-	-	-	-	-	-	-	-	-	-	-	-	-	-	-	-	-
KPN40	plasmid_AF460	unknown		2	59856	59856	60937	no	-	NA	0	0	0	0	-	0	-	0	-	0	-	0	-	0	-	-	-	-	-	-	-	-	-	-	-	-	-	-	-	-	-	-	-	-	-	-	-	-	-
KPN87	plasmid_AF460	unknown		1	50487	50487	50487	no	-	NA	0	0	0	0	-	0	-	0	-	0	-	0	-	0	-	-	-	-	-	-	-	-	-	-	-	-	-	-	-	-	-	-	-	-	-	-	-	-	-
KPN103	plasmid_AF571	unknown		9	26684	40727	123119	no	-	NA	0	0	1	2	-	0	-	0	-	0	-	0	-	0	-	-	-	strA.v1;strB.v1	-	-	-	-	-	-	-	-	-	-	-	-	-	-	-	-	-	-	-	-	-
KPN80	plasmid_AF571	unknown		1	20388	20388	20388	no	-	NA	0	0	0	0	-	0	-	0	-	0	-	0	-	0	-	-	-	-	-	-	-	-	-	-	-	-	-	-	-	-	-	-	-	-	-	-	-	-	-
KPN88	plasmid_AG658	unknown		1	6995	6995	6995	no	N50	NA	0	0	3	3	-	0	-	0	-	0	-	0	-	0	-	-	-	aadA^	-	-	-	-	-	cmlA1*	-	sul3	-	-	-	-	-	-	-	-	-	-	-	-	-
KPN098	plasmid_novel_0470afd25ded5e61606cf1fac7e7c930	unknown		1	18713	18713	18713	no	-	NA	0	0	0	0	-	0	-	0	-	0	-	0	-	0	-	-	-	-	-	-	-	-	-	-	-	-	-	-	-	-	-	-	-	-	-	-	-	-	-
KPN094	plasmid_novel_08122fcffdcabece373abb81972c57e2	unknown		3	7056	7056	11806	no	N50	NA	0	0	2	2	-	0	-	0	-	0	-	0	-	0	-	-	-	-	-	-	-	-	ereA2*	-	arr-2	-	-	-	-	-	-	-	-	-	-	-	-	-	-
KPN177	plasmid_novel_2066c9074227e381a6079f60a2711c8e	unknown		3	20230	20230	24372	no	-	NA	0	0	0	0	-	0	-	0	-	0	-	0	-	0	-	-	-	-	-	-	-	-	-	-	-	-	-	-	-	-	-	-	-	-	-	-	-	-	-
KPN42	plasmid_novel_216828ebf055e3d829cc9ea4893ada5b	unknown		1	5792	5792	5792	no	N50	NA	0	0	0	0	-	0	-	0	-	0	-	0	-	0	-	-	-	-	-	-	-	-	-	-	-	-	-	-	-	-	-	-	-	-	-	-	-	-	-
KPN100	plasmid_novel_2428e3c17bc5ad9cb5b9d49e396329b8	unknown		3	9933	9933	13634	no	N50	NA	0	0	0	0	-	0	-	0	-	0	-	0	-	0	-	-	-	-	-	-	-	-	-	-	-	-	-	-	-	-	-	-	-	-	-	-	-	-	-
KPN85	plasmid_novel_24c61cfab705c1bbb61feea9dbc05e09	unknown		2	12863	12863	16242	no	-	NA	0	0	0	0	-	0	-	0	-	0	-	0	-	0	-	-	-	-	-	-	-	-	-	-	-	-	-	-	-	-	-	-	-	-	-	-	-	-	-
KPN168	plasmid_novel_279edfed96e82be3f44a8d0619cf5edf	unknown		3	7133	7133	11299	no	N50	NA	0	0	3	4	-	0	-	0	-	0	-	0	-	0	-	-	-	aac(6')-Ib-cr.v2;aadA16*	-	-	-	-	-	-	arr-3	-	-	-	dfrA27	-	-	-	-	-	-	-	-	-	-
KPN22	plasmid_novel_2b844d83b1b1f47c90c1764ed82a204e	unknown		1	3593	3593	3593	no	N50	NA	0	0	0	0	-	0	-	0	-	0	-	0	-	0	-	-	-	-	-	-	-	-	-	-	-	-	-	-	-	-	-	-	-	-	-	-	-	-	-
KPN098	plasmid_novel_2ee0dcecfad252ba2a63d31123dcaff4	unknown		5	9282	11365	25442	no	N50	NA	0	0	0	0	-	0	-	0	-	0	-	0	-	0	-	-	-	-	-	-	-	-	-	-	-	-	-	-	-	-	-	-	-	-	-	-	-	-	-
KPN172	plasmid_novel_3a87af47abf017df8d6e1cabc581b2fe	unknown		5	3430	7869	17001	no	N50	NA	0	0	0	0	-	0	-	0	-	0	-	0	-	0	-	-	-	-	-	-	-	-	-	-	-	-	-	-	-	-	-	-	-	-	-	-	-	-	-
KPN124	plasmid_novel_4e084948b8e58876292e81c890012d71	unknown		1	4167	4167	4167	no	N50	NA	0	0	0	0	-	0	-	0	-	0	-	0	-	0	-	-	-	-	-	-	-	-	-	-	-	-	-	-	-	-	-	-	-	-	-	-	-	-	-
KPN42	plasmid_novel_5fe3d4207ba4de0636f604010e2c1457	unknown		3	19753	19753	34447	no	-	NA	0	0	0	0	-	0	-	0	-	0	-	0	-	0	-	-	-	-	-	-	-	-	-	-	-	-	-	-	-	-	-	-	-	-	-	-	-	-	-
KPN141	plasmid_novel_6b406de6ca73d62b0d9b861ac2e2f48d	unknown		1	2540	2540	2540	no	N50	NA	0	0	0	0	-	0	-	0	-	0	-	0	-	0	-	-	-	-	-	-	-	-	-	-	-	-	-	-	-	-	-	-	-	-	-	-	-	-	-
KPN43	plasmid_novel_6d20ec29e891ea51a471d7a609e64528	unknown		1	5792	5792	5792	no	N50	NA	0	0	0	0	-	0	-	0	-	0	-	0	-	0	-	-	-	-	-	-	-	-	-	-	-	-	-	-	-	-	-	-	-	-	-	-	-	-	-
KPN22	plasmid_novel_965a2ee4ef27b7c0c6432125c5c05389	unknown		1	55357	55357	55357	no	-	NA	0	0	0	0	-	0	-	0	-	0	-	0	-	0	-	-	-	-	-	-	-	-	-	-	-	-	-	-	-	-	-	-	-	-	-	-	-	-	-
KPN161	plasmid_novel_9c668c6499f26da03c80addc1682ba2c	unknown		7	15963	24166	78544	no	-	NA	0	0	0	0	-	0	-	0	-	0	-	0	-	0	-	-	-	-	-	-	-	-	-	-	-	-	-	-	-	-	-	-	-	-	-	-	-	-	-
KPN52	plasmid_novel_a576f7ae4b95327b18160f1b4da6d320	unknown		7	19738	20925	79572	no	-	NA	0	0	0	0	-	0	-	0	-	0	-	0	-	0	-	-	-	-	-	-	-	-	-	-	-	-	-	-	-	-	-	-	-	-	-	-	-	-	-
KPN172	plasmid_novel_a809ae52cb4887a5d19ac76fc16aae9f	unknown		1	5741	5741	5741	no	N50	NA	0	0	0	0	-	0	-	0	-	0	-	0	-	0	-	-	-	-	-	-	-	-	-	-	-	-	-	-	-	-	-	-	-	-	-	-	-	-	-
KPN24	plasmid_novel_ac92e06c74e6f8bc119d1f1041a68175	unknown		1	3397	3397	3397	no	N50	NA	0	0	0	0	-	0	-	0	-	0	-	0	-	0	-	-	-	-	-	-	-	-	-	-	-	-	-	-	-	-	-	-	-	-	-	-	-	-	-
KPN167	plasmid_novel_c3ebfb12dd0b31d2008894254a08e958	unknown		1	4622	4622	4622	no	N50	NA	0	0	0	0	-	0	-	0	-	0	-	0	-	0	-	-	-	-	-	-	-	-	-	-	-	-	-	-	-	-	-	-	-	-	-	-	-	-	-
KPN152	plasmid_novel_e129f6d54013ef6b7c90ac940477c6f4	unknown		1	2900	2900	2900	no	N50	NA	0	0	0	0	-	0	-	0	-	0	-	0	-	0	-	-	-	-	-	-	-	-	-	-	-	-	-	-	-	-	-	-	-	-	-	-	-	-	-
KPN36	plasmid_novel_e670d517682d9d462deee45cb4ff5a3c	unknown		7	19738	20959	77754	no	-	NA	0	0	0	0	-	0	-	0	-	0	-	0	-	0	-	-	-	-	-	-	-	-	-	-	-	-	-	-	-	-	-	-	-	-	-	-	-	-	-
KPN48	plasmid_novel_ee7120c27adc2fbbb3517b21bda17ec1	unknown		1	4166	4166	4166	no	N50	NA	0	0	0	0	-	0	-	0	-	0	-	0	-	0	-	-	-	-	-	-	-	-	-	-	-	-	-	-	-	-	-	-	-	-	-	-	-	-	-
KPN157	plasmid_novel_f1a8c5820f0b5c46ff6cf3705e523024	unknown		8	14648	21294	56771	no	-	NA	0	0	1	1	-	0	-	0	-	0	-	0	-	0	-	-	-	-	-	-	-	-	-	-	-	-	tet(D)	-	-	-	-	-	-	-	SHV-11.v1^	35Q	-	-	-
KPN157	plasmid_novel_faaa265ff453d27c4c0a798e54b8ad1e	unknown		1	5410	5410	5410	no	N50	NA	0	0	0	0	-	0	-	0	-	0	-	0	-	0	-	-	-	-	-	-	-	-	-	-	-	-	-	-	-	-	-	-	-	-	-	-	-	-	-
KPN117	plasmid_AA276	unknown		9	32667	56344	141592	no	-	NA	0	1	6	9	-	0	-	0	-	0	-	0	-	0	-	-	-	aac(6')-Ib-cr.v2;strA.v1^;strB.v1	-	-	-	-	-	CatB4.v1?	-	sul2	-	-	dfrA14.v2*	OXA-1;TEM-1D.v1^	-	CTX-M-15	-	-	-	-	-	-	-
KPN86	plasmid_AA276	unknown		18	54631	77279	253538	no	-	NA	0	1	7	10	-	0	-	0	-	0	-	0	-	0	-	-	-	aac(3)-IId^;strA.v1^;strB.v1	-	-	qnrS1	-	-	-	-	sul1;sul2	tet(A).v1	-	dfrA1.v1	LAP-2	-	CTX-M-14	-	-	-	-	-	-	-
KPN099	plasmid_AA277	unknown		15	58575	72709	230751	no	-	NA	0	1	8	12	-	0	-	0	-	0	-	0	-	0	-	-	-	aac(3)-IIa.v1^;aac(6')-Ib-cr.v2;strA.v1^;strB.v1	-	-	qnrB1.v2^	-	-	CatB4.v1	-	sul2	tet(A).v1	-	dfrA14.v2*	OXA-1;TEM-1D.v1^	-	CTX-M-15	-	-	-	-	-	-	-
KPN122	plasmid_AA277	unknown		9	72614	78272	185124	no	-	NA	0	1	8	12	-	0	-	0	-	0	-	0	-	0	-	-	-	aac(3)-IIa.v1^;aac(6')-Ib-cr.v2;strA.v1^;strB.v1	-	-	qnrB1.v2^	-	-	CatB4.v1?	-	sul2	tet(A).v1	-	dfrA14.v2*	OXA-1;TEM-1D.v1^	-	CTX-M-15	-	-	-	-	-	-	-
KPN142	plasmid_AA277	unknown		14	62481	78530	209443	no	-	NA	0	1	8	11	-	0	-	0	-	0	-	0	-	0	-	-	-	aac(6')-Ib-cr.v2;strA.v1^;strB.v1	-	-	qnrB1.v2^	-	-	CatB4.v1?	-	sul2	tet(A).v1	-	dfrA14.v2*	OXA-1;TEM-1D.v1^	-	CTX-M-15	-	-	-	-	-	-	-
KPN178	plasmid_AA277	unknown		21	24299	58475	231236	no	-	NA	0	1	8	12	-	0	-	0	-	0	-	0	-	0	-	-	-	aac(3)-IIa.v1^;aac(6')-Ib-cr.v2;strA.v1^;strB.v1	-	-	qnrB1.v2^	-	-	CatB4.v1?	-	sul2	tet(A).v1	-	dfrA14.v2*	OXA-1;TEM-1D.v1^	-	CTX-M-15	-	-	-	-	-	-	-
KPN166	plasmid_AA434	unknown		5	5482	6983	20339	no	N50	NA	0	1	1	1	-	0	-	0	-	0	-	0	-	0	-	-	-	-	-	-	-	-	-	-	-	-	-	-	-	-	-	SHV-12	-	-	-	238S;240K;35Q	-	-	-
KPN107	plasmid_AD094	unknown		3	3042	3679	8053	no	N50	NA	0	1	1	1	-	0	-	0	-	0	-	0	-	0	-	-	-	-	-	-	-	-	-	-	-	-	-	-	-	-	-	SHV-12	-	-	-	238S;240K;35Q	-	-	-
KPN18	plasmid_AD094	unknown		3	2952	3779	8063	no	N50	NA	0	1	1	1	-	0	-	0	-	0	-	0	-	0	-	-	-	-	-	-	-	-	-	-	-	-	-	-	-	-	-	SHV-12	-	-	-	238S;240K;35Q	-	-	-
KPN168	plasmid_AD158	unknown		1	29039	29039	29039	no	-	NA	0	1	1	1	-	0	-	0	-	0	-	0	-	0	-	-	-	-	-	-	-	-	-	-	-	-	-	-	-	-	-	TEM-10.v2^	-	-	-	-	-	-	-
KPN151	plasmid_AD982	unknown		4	5482	6983	18239	no	N50	NA	0	1	1	1	-	0	-	0	-	0	-	0	-	0	-	-	-	-	-	-	-	-	-	-	-	-	-	-	-	-	-	SHV-12	-	-	-	238S;240K;35Q	-	-	-
KPN095	plasmid_AA357	unknown		10	63987	63987	122420	no	-	NA	0	2	2	2	-	0	-	0	-	0	-	0	-	0	-	-	-	-	-	-	-	-	-	-	-	-	-	-	dfrA14.v2*	-	-	-	-	KPC-3	-	-	-	-	-
KPN104	plasmid_AA357	unknown		24	7974	18473	126653	no	N50	NA	0	2	5	9	-	0	-	0	-	0	-	0	-	0	-	-	-	aac(6')-Ib'.v1;aadA*;strA.v1^;strB.v1	-	-	-	-	-	-	-	sul2	-	-	dfrA14.v2*	OXA-9.v1;TEM-1D.v1^	-	-	-	KPC-3	-	-	-	-	-
KPN107	plasmid_AA357	unknown		15	9922	18473	107929	no	N50	NA	0	2	5	9	-	0	-	0	-	0	-	0	-	0	-	-	-	aac(6')-Ib'.v1*;aadA*;strA.v1^;strB.v1	-	-	-	-	-	-	-	sul2	-	-	dfrA14.v2*	OXA-9.v1;TEM-1D.v1^	-	-	-	KPC-3	-	-	-	-	-
KPN151	plasmid_AA357	unknown		20	11803	32972	176458	no	-	NA	0	2	5	9	-	0	-	0	-	0	-	0	-	0	-	-	-	aac(6')-Ib'.v1;aadA*;strA.v1^;strB.v1	-	-	-	-	-	-	-	sul2	-	-	dfrA14.v2*	OXA-9.v1;TEM-1	-	-	-	KPC-3	-	-	-	-	-
KPN166	plasmid_AA357	unknown		22	11803	32972	179752	no	-	NA	0	2	5	8	-	0	-	0	-	0	-	0	-	0	-	-	-	aadA*;strA.v1^;strB.v1	-	-	-	-	-	-	-	sul2	-	-	dfrA14.v2*	OXA-9.v1;TEM-1D.v1^	-	-	-	KPC-3	-	-	-	-	-
KPN18	plasmid_AA357	unknown		15	15081	26127	118773	no	-	NA	0	2	5	8	-	0	-	0	-	0	-	0	-	0	-	-	-	aac(6')-Ib'.v1*;aadA*;strA.v1^;strB.v1	-	-	-	-	-	-	-	sul2	-	-	dfrA14.v2*	OXA-9.v1	-	-	-	KPC-3	-	-	-	-	-
KPN35	plasmid_AA357	unknown		7	8538	16382	49266	no	N50	NA	0	2	3	4	-	0	-	0	-	0	-	0	-	0	-	-	-	strA.v1^;strB.v1	-	-	-	-	-	-	-	sul2	-	-	-	-	-	-	-	KPC-3	-	-	-	-	-
KPN3	plasmid_AA357	unknown		22	8074	18573	125558	no	N50	NA	0	2	4	7	-	0	-	0	-	0	-	0	-	0	-	-	-	aac(6')-Ib'.v1;aadA*;strA.v1^;strB.v1	-	-	-	-	-	-	-	sul2	-	-	-	OXA-9.v1	-	-	-	KPC-3	-	-	-	-	-
KPN69	plasmid_AA357	unknown		11	26657	50755	123000	no	-	NA	0	2	2	2	-	0	-	0	-	0	-	0	-	0	-	-	-	-	-	-	-	-	-	-	-	-	-	-	dfrA14.v2*	-	-	-	-	KPC-3	-	-	-	-	-
KPN70	plasmid_AA357	unknown		9	26657	50755	121993	no	-	NA	0	2	2	2	-	0	-	0	-	0	-	0	-	0	-	-	-	-	-	-	-	-	-	-	-	-	-	-	dfrA14.v2*	-	-	-	-	KPC-3	-	-	-	-	-
KPN132	plasmid_AA405	unknown		25	43508	73450	298464	no	-	NA	0	2	7	13	-	0	-	0	-	0	-	0	-	0	-	-	-	aac(3)-IId^;aadA2^;aph(3')-VI;armA;strA.v1;strB.v1	-	-	qnrB4	-	mphE.v2^;msrE	-	-	sul1	-	-	dfrA12	DHA-1	-	-	-	NDM-1	SHV-11.v1^	35Q	-	-	-
[truncated: 49 more columns]

## Sheet: MOBTyper
Table S2. Features of in silico-predicted plasmids
sample_id	num_contigs	size	gc	md5	rep_type(s)	rep_type_accession(s)	relaxase_type(s)	relaxase_type_accession(s)	mpf_type	mpf_type_accession(s)	orit_type(s)	orit_accession(s)	predicted_mobility	mash_nearest_neighbor	mash_neighbor_distance	mash_neighbor_identification	primary_cluster_id	secondary_cluster_id	predicted_host_range_overall_rank	predicted_host_range_overall_name	observed_host_range_ncbi_rank	observed_host_range_ncbi_name	reported_host_range_lit_rank	reported_host_range_lit_name	associated_pmid(s)
KPN093:AA421	1	13124	51.722	2adbfb28ccfc1ed522a8b1675bf1eb94	-	-	-	-	-	-	-	-	non-mobilizable	CP020054	0.0549966	Enterobacter cloacae	AA421	-	genus	Enterobacter	genus	Enterobacter	-	-	-
KPN094:AA554	10	23297	56.2476	d598ef64a83339e7698df2030d14a3ed	-	-	-	-	-	-	-	-	non-mobilizable	CP023250	0.0405854	Klebsiella pneumoniae	AA554	-	genus	Klebsiella	genus	Klebsiella	-	-	-
KPN098:AA447	3	48170	46.5933	b5b4c36bad6117eeecf90bd90de5d1d7	-	-	-	-	-	-	-	-	non-mobilizable	CP031801	0.0531179	Klebsiella pneumoniae	AA447	-	genus	Klebsiella	genus	Klebsiella	-	-	-
KPN100:AA024	8	69406	49.3531	612ba6688e9c2c9d64e9f101b8527972	-	-	-	-	-	-	-	-	non-mobilizable	CP026185	0.0515304	Klebsiella pneumoniae	AA024	-	family	Enterobacteriaceae	family	Enterobacteriaceae	-	-	-
KPN104:AD094	3	9738	59.2113	1c3fe1e94bbd213a4937e4217845de44	-	-	-	-	-	-	-	-	non-mobilizable	CP015133	0.0381928	Klebsiella pneumoniae	AD094	-	genus	Klebsiella	genus	Klebsiella	-	-	-
KPN106:AA111	1	1258	55.3259	2f39fedfe06361f439889473713a21b5	-	-	-	-	-	-	-	-	non-mobilizable	CP031819	0.059819	Klebsiella pneumoniae	AA111	-	genus	Klebsiella	genus	Klebsiella	-	-	-
KPN107:AD094	3	8053	60.3253	36bfc16c53b82715596638d6f536d62b	-	-	-	-	-	-	-	-	non-mobilizable	CP015133	0.0264788	Klebsiella pneumoniae	AD094	-	genus	Klebsiella	genus	Klebsiella	-	-	-
KPN117:AC247	2	18237	57.1914	22342a5daa5ade55d6a31cf92808bfa6	-	-	-	-	-	-	-	-	non-mobilizable	MF621616	0.040724	Aeromonas salmonicida subsp. salmonicida	AC247	-	class	Gammaproteobacteria	class	Gammaproteobacteria	-	-	-
KPN118:AA275	2	63293	52.5461	499d00bab333a38b297e559da7c2be78	-	-	MOBF,MOBF	CP035180_00077,NC_021231_00058	MPF_F	NC_021502_00150,NC_014312_00116,NC_014312_00118,NC_023332_00154,NC_019389_00068,NC_014312_00128,NC_022609_00081,NC_019389_00080,NC_021654_00016,NC_019165_00034,NC_019155_00032,NC_021502_00131	-	-	conjugative	CP025145	0.0364545	Klebsiella pneumoniae	AA275	-	genus	Klebsiella	genus	Klebsiella	-	-	-
KPN118:AF460	2	47851	46.0994	d9a159fe4c0eca12e683c2c0b62f6584	-	-	-	-	MPF_F	NC_018107_00101	-	-	non-mobilizable	CP031580	0.0319897	Klebsiella pneumoniae	AF460	-	family	Enterobacteriaceae	family	Enterobacteriaceae	-	-	-
KPN120:AA050	2	36773	54.8663	9ca270046f2b8b4b62313ab72cfd8f76	-	-	-	-	-	-	-	-	non-mobilizable	CP007735	0.0233014	Klebsiella pneumoniae subsp. pneumoniae KPNIH27	AA050	AH642	family	Enterobacteriaceae	family	Enterobacteriaceae	-	-	-
KPN120:AB181	6	41596	55.2697	c6fd5cb6bfd04cd9dc97ee018796a254	-	-	-	-	-	-	-	-	non-mobilizable	CP031581	0.0533217	Klebsiella pneumoniae	AB181	-	genus	Klebsiella	genus	Klebsiella	-	-	-
KPN120:AC434	4	14027	56.3342	0e84bb60d18bed04aa2a5760cb6656c1	-	-	-	-	-	-	-	-	non-mobilizable	CP014125	0.0293293	Klebsiella pneumoniae	AC434	-	family	Enterobacteriaceae	family	Enterobacteriaceae	-	-	-
KPN121:AA038	2	41401	53.5639	de6b7a3923bb0dab4ee0684526b0ca55	-	-	-	-	-	-	-	-	non-mobilizable	CP031884	0.0331502	Klebsiella pneumoniae	AA038	-	order	Enterobacterales	order	Enterobacterales	-	-	-
KPN121:AB193	4	25332	57.7688	f4ae5a59013398977be39bc3569af2c8	-	-	-	-	-	-	MOBF	NZ_CP016035	mobilizable	LC155908	0.0307758	Klebsiella pneumoniae	AB193	-	family	Enterobacteriaceae	family	Enterobacteriaceae	-	-	-
KPN122:AD465	1	2124	52.919	9a7d15de20806d6b0ccfaed8c2ba2c51	-	-	MOBV	CP042516_00001	-	-	-	-	mobilizable	CP025947	0.0311746	Escherichia coli	AD465	-	order	Enterobacterales	order	Enterobacterales	-	-	-
KPN123:AA552	6	22944	50.3966	213c8bf1fcdb39cd9d7f078eaf1785d6	-	-	-	-	-	-	-	-	non-mobilizable	CP042533	0.0590885	Klebsiella aerogenes	AA552	-	class	Gammaproteobacteria	class	Gammaproteobacteria	-	-	-
KPN123:AD442	1	20695	54.5397	05990e3966b4515c96be906f9527b343	-	-	-	-	-	-	-	-	non-mobilizable	CP023935	0.0233762	Klebsiella pneumoniae	AD442	AN000	genus	Klebsiella	genus	Klebsiella	-	-	-
KPN125:AD443	9	65826	54.1169	afc837296fb667ef77e041dd24bf8b78	-	-	-	-	-	-	-	-	non-mobilizable	CP041645	0.0393656	Klebsiella pneumoniae	AD443	-	genus	Klebsiella	genus	Klebsiella	-	-	-
KPN126:AF460	2	31688	45.847	755c132889aa75d6dfe159a5b8a18d54	-	-	MOBH	NC_016980_00239	MPF_F	NC_018107_00101	-	-	conjugative	CP042869	0.0311746	Escherichia coli	AF460	-	family	Enterobacteriaceae	family	Enterobacteriaceae	-	-	-
KPN130:AB595	2	9190	56.7356	a7c91dfe14d4e9fabde8575f9c2a3b0d	-	-	-	-	-	-	-	-	non-mobilizable	LT985307	0.0394988	Escherichia coli	AB595	-	family	Enterobacteriaceae	family	Enterobacteriaceae	-	-	-
KPN132:AC249	2	7557	58.0654	528fd2507c7b0f09d9e3c3cb4ea2fb50	-	-	-	-	-	-	-	-	non-mobilizable	KU254581	0.051337	Escherichia coli	AC249	-	genus	Escherichia	genus	Escherichia	-	-	-
KPN139:AD338	1	5752	49.235	b8b01ba16fb466ed554cc9959141c9b7	-	-	MOBP	NC_017723_00002	-	-	-	-	mobilizable	CP041098	0.0294234	Klebsiella pneumoniae subsp. pneumoniae	AD338	-	family	Enterobacteriaceae	family	Enterobacteriaceae	-	-	-
KPN140:AC411	1	8977	55.1966	c00891d8df0aec9c3bca0395df7bd02f	-	-	-	-	-	-	-	-	non-mobilizable	AB905284	0.0130157	Escherichia coli	AC411	AL593	multi-phylla	Actinobacteria,Proteobacteria	multi-phylla	Actinobacteria,Proteobacteria	-	-	-
KPN148:AA035	9	58327	50.9232	55fa4ba6452bc913d2d4894271cfe3e3	-	-	-	-	-	-	-	-	non-mobilizable	CP032169	0.0403101	Klebsiella pneumoniae	AA035	-	order	Enterobacterales	order	Enterobacterales	-	-	-
KPN148:AA043	3	58127	54.0644	4bcc99ddac70197e858c3875837db251	-	-	-	-	MPF_T	NC_006143_00077	-	-	non-mobilizable	CP011633	0.0400373	Klebsiella oxytoca	AA043	-	genus	Klebsiella	genus	Klebsiella	-	-	-
KPN148:AA449	5	57504	51.699	f98eaa468d38965d75253844a04d3514	-	-	MOBF,MOBF	CP035180_00077,NC_021231_00058	MPF_F	NC_014312_00116,NC_014312_00118,NC_023332_00154,NC_019389_00068,NC_014312_00128,NC_022609_00081,NC_019389_00080,NC_021654_00016,NC_019165_00034,NC_014312_00141,NC_021502_00131,NC_021502_00150	-	-	conjugative	CP018340	0.0333664	Klebsiella pneumoniae	AA449	-	family	Enterobacteriaceae	family	Enterobacteriaceae	-	-	-
KPN150:AF460	3	41385	47.0001	331102f3c08aa8dde1c65676ed32129a	-	-	MOBH	NC_016980_00239	MPF_F	NC_018107_00101	-	-	conjugative	CP042869	0.0360949	Escherichia coli	AF460	-	family	Enterobacteriaceae	family	Enterobacteriaceae	-	-	-
KPN151:AD982	4	18239	53.0292	20bb81b3f51ff030e6c540b46dcc3ad1	-	-	-	-	-	-	-	-	non-mobilizable	CP020846	0.0517248	Klebsiella pneumoniae	AD982	-	genus	Klebsiella	genus	Klebsiella	-	-	-
KPN157:AA553	1	13368	49.1622	645442f9c79a368d1db3b8e9ecea4451	-	-	-	-	-	-	-	-	non-mobilizable	CP028179	0.0276889	Klebsiella pneumoniae	AA553	-	genus	Klebsiella	genus	Klebsiella	-	-	-
KPN157:AA554	3	20782	57.7904	9c68881ebb55aef470ddfc78eaafbe9c	-	-	-	-	-	-	-	-	non-mobilizable	CP023250	0.043179	Klebsiella pneumoniae	AA554	-	genus	Klebsiella	genus	Klebsiella	-	-	-
KPN157:AB049	1	3953	34.5054	9c0e7faaab2e2c7a2765f68c95cb0852	-	-	-	-	-	-	-	-	non-mobilizable	CP035218	0.0265635	Klebsiella michiganensis	AB049	-	family	Enterobacteriaceae	family	Enterobacteriaceae	-	-	-
KPN157:AC776	2	8070	49.4548	02a0c0a0ca428308a760177959eb3e41	-	-	-	-	-	-	-	-	non-mobilizable	CP025946	0.0529154	Escherichia coli	AC776	-	genus	Escherichia	genus	Escherichia	-	-	-
KPN161:AD443	7	67479	52.3422	3fed556fb79973ec22bd128e033e1014	-	-	-	-	-	-	-	-	non-mobilizable	CP032173	0.0333664	Klebsiella pneumoniae	AD443	-	genus	Klebsiella	genus	Klebsiella	-	-	-
KPN166:AA434	5	20339	53.3556	74b5057ee6bcc41572d1bacb68f3dcfd	-	-	-	-	-	-	-	-	non-mobilizable	CP025040	0.050014	Klebsiella pneumoniae	AA434	-	genus	Klebsiella	genus	Klebsiella	-	-	-
KPN167:AD441	2	29755	55.4798	1a818cfc680a632b2329ec416c52d573	-	-	-	-	-	-	-	-	non-mobilizable	CP029140	0.0475157	Klebsiella michiganensis	AD441	-	genus	Klebsiella	genus	Klebsiella	-	-	-
KPN167:novel_c3ebfb12dd0b31d2008894254a08e958	1	4622	51.7741	c3ebfb12dd0b31d2008894254a08e958	-	-	MOBP	NC_017723_00002	-	-	-	-	mobilizable	CP040890	0.0659724	Leclercia adecarboxylata	novel_c3ebfb12dd0b31d2008894254a08e958	-	family	Enterobacteriaceae	family	Enterobacteriaceae	-	-	-
KPN170:AD092	1	1333	51.4629	5911df0260968dc463b734bac85fd1b6	-	-	-	-	-	-	-	-	non-mobilizable	NC_010064	0.0119383	Escherichia coli	AD092	AM522	order	Enterobacterales	order	Enterobacterales	-	-	-
KPN171:AA275	3	40659	54.3398	d248af997232ea50c02d3e9d556749c4	-	-	MOBF,MOBF	CP035180_00077,NC_021231_00058	MPF_T	NC_021502_00150	-	-	conjugative	CP025145	0.0475157	Klebsiella pneumoniae	AA275	-	genus	Klebsiella	genus	Klebsiella	-	-	-
KPN174:AA833	7	40514	50.738	5e0dd1edabdc152357dc296f7ec17b5f	-	-	-	-	-	-	-	-	non-mobilizable	CP035197	0.0403101	Klebsiella pneumoniae	AA833	-	family	Enterobacteriaceae	family	Enterobacteriaceae	-	-	-
KPN175:AA275	3	40659	54.3373	14a7395d7f8ee28d1836a2430053c5b6	-	-	MOBF,MOBF	CP035180_00077,NC_021231_00058	MPF_T	NC_021502_00150	-	-	conjugative	CP025145	0.0475157	Klebsiella pneumoniae	AA275	-	genus	Klebsiella	genus	Klebsiella	-	-	-
KPN176:AE480	1	2014	44.9851	14bd83f1c278db4ad8e8a517d1dcd48c	-	-	-	-	-	-	-	-	non-mobilizable	CP042577	0.00574147	Enterobacter hormaechei	AE480	AO271	genus	Enterobacter	genus	Enterobacter	-	-	-
KPN18:AD094	3	8063	60.2009	a2f97a8761af5eec832128e8e12fa083	-	-	-	-	-	-	-	-	non-mobilizable	CP015133	0.0279555	Klebsiella pneumoniae	AD094	-	genus	Klebsiella	genus	Klebsiella	-	-	-
KPN22:AD338	1	4448	54.8561	30cdc80cdb590c1685d8c30e2399c9a9	-	-	MOBP	NC_017723_00002	-	-	-	-	mobilizable	CP041098	0.0425838	Klebsiella pneumoniae subsp. pneumoniae	AD338	-	family	Enterobacteriaceae	family	Enterobacteriaceae	-	-	-
KPN22:novel_2b844d83b1b1f47c90c1764ed82a204e	1	3593	49.4016	2b844d83b1b1f47c90c1764ed82a204e	-	-	MOBP	KU302805_00002	-	-	-	-	mobilizable	KU302805	0.0699663	Enterobacter cloacae	novel_2b844d83b1b1f47c90c1764ed82a204e	-	genus	Enterobacter	genus	Enterobacter	-	-	-
KPN24:AB186	2	28486	56.9297	c13f6528ce1a32599090a4cc467286de	-	-	-	-	-	-	-	-	non-mobilizable	CP008898	0.0210864	Enterobacter hormaechei subsp. hoffmannii ECNIH3	AB186	AJ828	genus	Enterobacter	genus	Enterobacter	-	-	-
KPN24:AD442	4	51873	53.8488	e900212dfe70a684f24e00358b67291a	-	-	-	-	-	-	-	-	non-mobilizable	CP023935	0.0552118	Klebsiella pneumoniae	AD442	-	genus	Klebsiella	genus	Klebsiella	-	-	-
KPN25:AA275	7	75674	54.7771	4e5529f9c0856b47b4780267d711115c	-	-	MOBF,MOBF	CP035180_00077,NC_021231_00058	MPF_T	NC_021502_00150	-	-	conjugative	CP036443	0.0275126	Klebsiella pneumoniae	AA275	-	genus	Klebsiella	genus	Klebsiella	-	-	-
KPN28:AB595	2	7745	53.2989	4b9aef3bb79c750b5910affc03e01892	-	-	-	-	-	-	-	-	non-mobilizable	LT985307	0.0388388	Escherichia coli	AB595	-	family	Enterobacteriaceae	family	Enterobacteriaceae	-	-	-
KPN31:AA457	3	66068	53.563	0cea601458cbf165deb460076ade5218	-	-	-	-	-	-	-	-	non-mobilizable	CP015132	0.0363341	Klebsiella pneumoniae	AA457	-	genus	Klebsiella	genus	Klebsiella	-	-	-
KPN32:AA457	3	66207	53.5638	ffe15b70af0e04081d7061eb962313f2	-	-	-	-	-	-	-	-	non-mobilizable	CP015132	0.0359759	Klebsiella pneumoniae	AA457	-	genus	Klebsiella	genus	Klebsiella	-	-	-
KPN33:AA457	3	65191	53.5411	72438971b20d79da7d745346fe1d6fc9	-	-	-	-	-	-	-	-	non-mobilizable	CP015132	0.0365754	Klebsiella pneumoniae	AA457	-	genus	Klebsiella	genus	Klebsiella	-	-	-
KPN33:AD094	4	28556	55.3509	97878caf119b6d6c3d1a387d9d6f65c9	-	-	-	-	-	-	-	-	non-mobilizable	CP015133	0.0391011	Klebsiella pneumoniae	AD094	-	genus	Klebsiella	genus	Klebsiella	-	-	-
KPN34:AA457	3	65149	53.5357	9619c7892edbf252362e4c74fe0fc8f5	-	-	-	-	-	-	-	-	non-mobilizable	CP015132	0.0364545	Klebsiella pneumoniae	AA457	-	genus	Klebsiella	genus	Klebsiella	-	-	-
KPN34:AD094	4	28545	55.3652	95d438196fe61bd7a761229a4efc1ba9	-	-	-	-	-	-	-	-	non-mobilizable	CP015133	0.0388388	Klebsiella pneumoniae	AD094	-	genus	Klebsiella	genus	Klebsiella	-	-	-
KPN35:AA942	1	1914	58.3072	618a9677a90fb841dfebe82edb575381	-	-	-	-	-	-	-	-	non-mobilizable	NC_022083	0.057671	Klebsiella pneumoniae JM45	AA942	-	family	Enterobacteriaceae	family	Enterobacteriaceae	-	-	-
KPN35:AB536	1	31888	34.2794	a7d38be05634d9be317b8effc1cd5913	-	-	-	-	-	-	-	-	non-mobilizable	CP019901	0.0498292	Raoultella planticola	AB536	-	family	Enterobacteriaceae	family	Enterobacteriaceae	-	-	-
KPN35:AD996	1	3938	28.8979	cc8e1f2ac2d12a2afab9ccad2d8e17f4	-	-	-	-	-	-	-	-	non-mobilizable	CP043769	0.0114419	Enterobacter hormaechei	AD996	AN694	genus	Enterobacter	genus	Enterobacter	-	-	-
KPN39:AB595	3	8097	54.3535	c2557a3a6bc3fb460958acd3de670914	-	-	-	-	-	-	-	-	non-mobilizable	CP001386	0.0461689	Shigella flexneri 2002017	AB595	-	family	Enterobacteriaceae	family	Enterobacteriaceae	-	-	-
KPN39:AD312	1	6655	60.3156	e5a3c3b8bfadbaea72a09351d232d3ee	-	-	-	-	-	-	-	-	non-mobilizable	KX434882	0.0122604	Klebsiella pneumoniae	AD312	AM831	family	Enterobacteriaceae	family	Enterobacteriaceae	-	-	-
KPN40:AF460	2	60937	46.3429	0a8daca950445a85dffc90697ef82cfb	-	-	MOBH	NC_016980_00239	MPF_F	NC_016980_00240,NC_018107_00101	-	-	conjugative	CP042869	0.0252411	Escherichia coli	AF460	-	family	Enterobacteriaceae	family	Enterobacteriaceae	-	-	-
KPN41:AD094	1	7997	60.7603	f019c088c855f8f93149e490c061c103	-	-	-	-	-	-	-	-	non-mobilizable	CP015133	0.00464278	Klebsiella pneumoniae	AD094	AM525	genus	Klebsiella	genus	Klebsiella	-	-	-
KPN42:AA402	9	95088	51.8488	015d003f5d351ddd36cfcecc5ceea961	-	-	-	-	-	-	-	-	non-mobilizable	CP021697	0.0385787	Klebsiella pneumoniae	AA402	-	genus	Klebsiella	genus	Klebsiella	-	-	-
KPN45:AA814	10	104217	52.9616	4c420486ecd182c9ca3b1e5d140ee0dc	-	-	-	-	-	-	-	-	non-mobilizable	CP034138	0.0284967	Klebsiella quasipneumoniae subsp. similipneumoniae	AA814	-	genus	Klebsiella	genus	Klebsiella	-	-	-
KPN49:AB750	2	6563	50.5257	c56aa83fbb98789ac993d2446f16c626	-	-	-	-	-	-	-	-	non-mobilizable	LR134212	0.0583726	Klebsiella aerogenes	AB750	-	genus	Klebsiella	genus	Klebsiella	-	-	-
KPN50:AA882	6	28315	34.8119	091de410d6deaf19db895dac817982c8	-	-	-	-	-	-	-	-	non-mobilizable	CP038594	0.035622	Salmonella enterica subsp. enterica serovar Senftenberg	AA882	-	family	Enterobacteriaceae	family	Enterobacteriaceae	-	-	-
KPN50:AB595	1	15339	57.5526	dae118e306ea1855083486ff3eeb3272	-	-	-	-	-	-	-	-	non-mobilizable	LT985307	0.0567566	Escherichia coli	AB595	-	family	Enterobacteriaceae	family	Enterobacteriaceae	-	-	-
KPN51:AA552	5	13519	51.9195	7943dc07c4d3567ee68ee9489b19cb69	-	-	-	-	-	-	-	-	non-mobilizable	LS998787	0.0482105	Escherichia coli	AA552	-	class	Gammaproteobacteria	class	Gammaproteobacteria	-	-	-
KPN53:AB054	2	2217	55.1646	7a9e23e90fbb89dfe2377bed6dbe8e50	-	-	-	-	-	-	-	-	non-mobilizable	CP011316	0.0489202	Klebsiella pneumoniae subsp. pneumoniae	AB054	-	family	Enterobacteriaceae	family	Enterobacteriaceae	-	-	-
KPN53:AC288	2	9440	53.4216	edb494fb4cebc160a73c13316112f7c0	-	-	-	-	-	-	-	-	non-mobilizable	NC_019984	0.0278663	Citrobacter freundii	AC288	-	genus	Citrobacter	genus	Citrobacter	-	-	-
KPN69:AA942	1	1895	57.942	7e503822e9693989692e2282710597a9	-	-	-	-	-	-	-	-	non-mobilizable	NC_022083	0.0590885	Klebsiella pneumoniae JM45	AA942	-	family	Enterobacteriaceae	family	Enterobacteriaceae	-	-	-
KPN80:AA033	1	23977	50.5985	5b7aa9f04f0ad18aded4f19e6440b08b	-	-	-	-	-	-	-	-	non-mobilizable	CP024490	0.0310744	Klebsiella pneumoniae	AA033	-	genus	Klebsiella	genus	Klebsiella	-	-	-
KPN80:AD982	1	9321	50.9817	a15b0d15536f653ce31d1372a7155e81	-	-	-	-	-	-	-	-	non-mobilizable	CP020846	0.0345853	Klebsiella pneumoniae	AD982	-	genus	Klebsiella	genus	Klebsiella	-	-	-
KPN80:AF571	1	20388	51.1379	c8a2d73d9d5d9aa209d5beaa43d46975	-	-	-	-	-	-	-	-	non-mobilizable	CP007736	0.0579033	Klebsiella pneumoniae subsp. pneumoniae KPNIH27	AF571	-	order	Enterobacterales	order	Enterobacterales	-	-	-
KPN83:AA421	1	13024	51.766	38f95586598abc947c67524142933255	-	-	-	-	-	-	-	-	non-mobilizable	CP020054	0.0547827	Enterobacter cloacae	AA421	-	genus	Enterobacter	genus	Enterobacter	-	-	-
KPN85:AD443	9	87626	53.3769	0715248e4cb1427dc68e3be92e1184fb	-	-	-	-	-	-	-	-	non-mobilizable	CP012989	0.0336937	Klebsiella pneumoniae	AD443	-	genus	Klebsiella	genus	Klebsiella	-	-	-
KPN87:AE437	10	118743	51.5247	e3caa6ab6664795c1af64addab2896ca	-	-	-	-	-	-	-	-	non-mobilizable	CP031790	0.0262266	Klebsiella pneumoniae	AE437	-	genus	Klebsiella	genus	Klebsiella	-	-	-
KPN87:AF460	1	50487	46.3466	04bc832d940b02e068d51fe56d59680e	-	-	MOBH	NC_016980_00239	MPF_F	NC_018107_00101,NC_016980_00240	-	-	conjugative	CP042869	0.0212923	Escherichia coli	AF460	AP411	family	Enterobacteriaceae	family	Enterobacteriaceae	-	-	-
KPN88:AD094	2	8103	60.385	3906a854c6d92774d2cae2754aa94925	-	-	-	-	-	-	-	-	non-mobilizable	CP015133	0.0269907	Klebsiella pneumoniae	AD094	-	genus	Klebsiella	genus	Klebsiella	-	-	-
KPN88:AG658	1	6995	47.1623	b06cd029c10c9989f491b8507d805111	-	-	-	-	-	-	-	-	non-mobilizable	KX434884	0.0169536	Klebsiella pneumoniae	AG658	AQ709	family	Enterobacteriaceae	family	Enterobacteriaceae	-	-	-
KPN094:AC748	1	2228	46.3196	642d83193b139ca47332b1ad91ae8c9c	Col(BS512)	NC_010656	-	-	-	-	-	-	non-mobilizable	CP030115	0.00060662	Escherichia coli	AC748	AM073	family	Enterobacteriaceae	family	Enterobacteriaceae	-	-	-
KPN132:AB685	1	1626	50.1845	b7fd02f0c2c66606bc399374efa785ea	Col(MG828)	NC_008486	-	-	-	-	MOBP,MOB_unknown	CP001386,GQ900404	mobilizable	CP003038	0.00274254	Escherichia coli O7:K1 str. CE10	AB685	AK562	order	Enterobacterales	order	Enterobacterales	genus	Escherichia	30761100
KPN41:AB687	1	1583	50.9792	d3d04bda4180413cf1c36477e6975b11	Col(MG828)	NC_008486	-	-	-	-	-	-	non-mobilizable	CP023506	0.000361208	Morganella morganii	AB687	AK566	order	Enterobacterales	order	Enterobacterales	genus	Escherichia	30761100
KPN131:AD338	1	4909	52.4139	2ca5fa167ef91d5bb7abf3af974bb731	Col(Ye4449)	FJ696405	MOBP	NC_017723_00002	-	-	-	-	mobilizable	CP041098	0.0357395	Klebsiella pneumoniae subsp. pneumoniae	AD338	-	order	Enterobacterales	order	Enterobacterales	-	-	-
KPN158:AD338	1	4983	52.358	0d5397a8f07490ba29a17c9d861653d6	Col(Ye4449)	FJ696405	MOBP	NC_017723_00002	-	-	-	-	mobilizable	CP041098	0.0425838	Klebsiella pneumoniae subsp. pneumoniae	AD338	-	order	Enterobacterales	order	Enterobacterales	-	-	-
KPN8:AD338	1	4909	52.3121	792d979a3b4f6847140bccfc6d80ee4b	Col(Ye4449)	FJ696405	MOBP	NC_017723_00002	-	-	-	-	mobilizable	CP041098	0.0363341	Klebsiella pneumoniae subsp. pneumoniae	AD338	-	order	Enterobacterales	order	Enterobacterales	-	-	-
KPN89:AD338	1	4909	52.4954	00e3dab780af5824bfc9c85a1554cb94	Col(Ye4449)	FJ696405	MOBP	NC_017723_00002	-	-	-	-	mobilizable	CP041098	0.0363341	Klebsiella pneumoniae subsp. pneumoniae	AD338	-	order	Enterobacterales	order	Enterobacterales	-	-	-
KPN122:AB237	1	1825	57.3151	7d5a01da5f94c2e8dc48957bfcb3508e	ColpVC	JX133088	-	-	-	-	-	-	non-mobilizable	CP041121	0.0026025	Escherichia coli	AB237	AJ935	order	Enterobacterales	order	Enterobacterales	-	-	-
KPN132:AB235	1	2011	50.9697	3b2e23eead2eb34b1078d5578e79403f	ColpVC	JX133088	-	-	-	-	-	-	non-mobilizable	CP024804	0.00149601	Escherichia coli	AB235	AJ932	order	Enterobacterales	order	Enterobacterales	-	-	-
KPN142:AB237	1	1825	56.9863	10b8799a4881581f4391c7e255ab0a5f	ColpVC	JX133088	-	-	-	-	-	-	non-mobilizable	CP041121	0.0026025	Escherichia coli	AB237	AJ935	order	Enterobacterales	order	Enterobacterales	-	-	-
KPN39:AB236	1	2135	56.3934	d53e834aaf1c0a2a811a7d9da2f52e49	ColpVC	JX133088	-	-	-	-	-	-	non-mobilizable	CP034052	0.000143503	Klebsiella pneumoniae	AB236	AJ933	order	Enterobacterales	order	Enterobacterales	-	-	-
KPN095:AA941	1	8779	54.562	602e47719ad0b6b819f5b1461aaf7c06	ColRNAI_rep_cluster_1857	000003__NC_002119_00001	MOBC	NC_009793_00003	-	-	-	-	mobilizable	CP018348	0.00238081	Klebsiella pneumoniae	AA941	AJ417	order	Enterobacterales	order	Enterobacterales	genus	Klebsiella	23800906; 24777092
KPN103:AA941	3	13625	53.8349	c2f866bb06c1fc8518997a62e6330ee2	ColRNAI_rep_cluster_1857	000003__NC_002119_00001	MOBC	NC_009793_00003	-	-	-	-	mobilizable	CP024651	0.00436283	Escherichia coli	AA941	AJ418	order	Enterobacterales	order	Enterobacterales	genus	Klebsiella	23800906; 24777092
KPN104:AA941	5	24015	55.5611	5070ace36cb06abe15b436da0ef20d2c	ColRNAI_rep_cluster_1857	000003__NC_002119_00001	MOBC,MOBF	NC_009793_00003,MF156708_00148	-	-	-	-	mobilizable	CP026710	0.0246043	Citrobacter koseri	AA941	AJ417	order	Enterobacterales	order	Enterobacterales	genus	Klebsiella	23800906; 24777092
KPN105:AA941	1	9371	55.1382	5f7f8a03075cda9fb97dedbeb5bafb70	ColRNAI_rep_cluster_1857	000003__NC_002119_00001	MOBC	NC_009793_00003	-	-	-	-	mobilizable	CP018348	2.38274e-05	Klebsiella pneumoniae	AA941	AJ417	order	Enterobacterales	order	Enterobacterales	genus	Klebsiella	23800906; 24777092
KPN107:AA941	3	17111	52.814	65089aee622ca50d9e9b6454b22c79fa	ColRNAI_rep_cluster_1857	000003__NC_002119_00001	MOBC	NC_009793_00003	-	-	-	-	mobilizable	CP031807	0.0157789	Klebsiella pneumoniae	AA941	AJ417	order	Enterobacterales	order	Enterobacterales	genus	Klebsiella	23800906; 24777092
KPN127:AA941	1	9371	55.1382	9c33b000cfb99c9d5a23cbcbda47aa8a	ColRNAI_rep_cluster_1857	000003__NC_002119_00001	MOBC	NC_009793_00003	-	-	-	-	mobilizable	CP018348	0	Klebsiella pneumoniae	AA941	AJ417	order	Enterobacterales	order	Enterobacterales	genus	Klebsiella	23800906; 24777092
KPN132:AA941	1	9371	55.2129	7cf56acce6e997fa7e4e58a53bdd6dd8	ColRNAI_rep_cluster_1857	000003__NC_002119_00001	MOBC	NC_009793_00003	-	-	-	-	mobilizable	CP032177	2.38274e-05	Klebsiella pneumoniae	AA941	AJ417	order	Enterobacterales	order	Enterobacterales	genus	Klebsiella	23800906; 24777092
KPN137:AA941	1	9371	55.1595	74af82a3b0340c6fae7ece01ccde482a	ColRNAI_rep_cluster_1857	000003__NC_002119_00001	MOBC	NC_009793_00003	-	-	-	-	mobilizable	CP018348	0	Klebsiella pneumoniae	AA941	AJ417	order	Enterobacterales	order	Enterobacterales	genus	Klebsiella	23800906; 24777092
KPN151:AA941	1	9371	55.2129	daa685e1f81874c119504adb296dbf9c	ColRNAI_rep_cluster_1857	000003__NC_002119_00001	MOBC	NC_009793_00003	-	-	-	-	mobilizable	CP018348	0	Klebsiella pneumoniae	AA941	AJ417	order	Enterobacterales	order	Enterobacterales	genus	Klebsiella	23800906; 24777092
KPN166:AA941	1	9371	55.2022	b8991f25418972dcddbfd7fd1c09e74c	ColRNAI_rep_cluster_1857	000003__NC_002119_00001	MOBC	NC_009793_00003	-	-	-	-	mobilizable	CP018348	0	Klebsiella pneumoniae	AA941	AJ417	order	Enterobacterales	order	Enterobacterales	genus	Klebsiella	23800906; 24777092
KPN168:AA945	1	8359	56.5977	54a0b3b0879dfcdeaaa04fcca799fb52	ColRNAI_rep_cluster_1857	GU949535_00001	MOBC	NC_009793_00003	-	-	-	-	mobilizable	CP023954	0.000191626	Klebsiella pneumoniae	AA945	AJ428	order	Enterobacterales	order	Enterobacterales	genus	Klebsiella	23800906; 24777092
KPN18:AA941	2	11118	54.2274	cc0dcd4887b77ecbd41964918d2a3396	ColRNAI_rep_cluster_1857	000003__NC_002119_00001	MOBC	NC_009793_00003	-	-	-	-	mobilizable	CP009772	0.00369655	Klebsiella pneumoniae subsp. pneumoniae	AA941	AJ417	order	Enterobacterales	order	Enterobacterales	genus	Klebsiella	23800906; 24777092
KPN23:AA942	1	10137	55.1051	b14ceba84b1b428aab8f024033e63c04	ColRNAI_rep_cluster_1857	000003__NC_002119_00001	MOBC	NC_009793_00003	-	-	-	-	mobilizable	MK181634	0	Klebsiella pneumoniae	AA942	AJ424	order	Enterobacterales	order	Enterobacterales	genus	Klebsiella	23800906; 24777092
KPN25:AA941	1	9421	55.0578	e337171bf76527f7e7b02be11c06bd37	ColRNAI_rep_cluster_1857	000003__NC_002119_00001	MOBC	NC_009793_00003	-	-	-	-	mobilizable	CP018348	0	Klebsiella pneumoniae	AA941	AJ417	order	Enterobacterales	order	Enterobacterales	genus	Klebsiella	23800906; 24777092
KPN3:AD548	11	60257	54.2775	16e352f837d2eaa85d611568ef579033	ColRNAI_rep_cluster_1857	000003__NC_002119_00001	MOBC,MOBF	NC_009793_00003,MF156708_00148	MPF_T	NC_021502_00150	-	-	conjugative	CP025042	0.0455159	Klebsiella pneumoniae	AD548	-	order	Enterobacterales	order	Enterobacterales	genus	Klebsiella	23800906; 24777092
KPN35:AA941	1	9371	55.2556	471b69c0e0546d2f246916cdcb0aa60e	ColRNAI_rep_cluster_1857	000003__NC_002119_00001	MOBC	NC_009793_00003	-	-	-	-	mobilizable	CP018348	0	Klebsiella pneumoniae	AA941	AJ417	order	Enterobacterales	order	Enterobacterales	genus	Klebsiella	23800906; 24777092
KPN55:AA941	1	9371	55.2342	d8081f31a384fc6f6a18da40185ec5a7	ColRNAI_rep_cluster_1857	000003__NC_002119_00001	MOBC	NC_009793_00003	-	-	-	-	mobilizable	CP018348	0	Klebsiella pneumoniae	AA941	AJ417	order	Enterobacterales	order	Enterobacterales	genus	Klebsiella	23800906; 24777092
KPN69:AA941	1	8729	54.76	0aa6471800a62b54422ff850e37284e4	ColRNAI_rep_cluster_1857	000003__NC_002119_00001	MOBC	NC_009793_00003	-	-	-	-	mobilizable	CP018348	0.00238081	Klebsiella pneumoniae	AA941	AJ417	order	Enterobacterales	order	Enterobacterales	genus	Klebsiella	23800906; 24777092
KPN70:AA941	1	8729	54.5882	6165198b1b71b4964ee90690b3296eac	ColRNAI_rep_cluster_1857	000003__NC_002119_00001	MOBC	NC_009793_00003	-	-	-	-	mobilizable	CP018348	0.00238081	Klebsiella pneumoniae	AA941	AJ417	order	Enterobacterales	order	Enterobacterales	genus	Klebsiella	23800906; 24777092
KPN81:AA941	1	9371	54.9995	0f02cfde72903b2222ce8c1ed63e9744	ColRNAI_rep_cluster_1857	000003__NC_002119_00001	MOBC	NC_009793_00003	-	-	-	-	mobilizable	CP018348	0	Klebsiella pneumoniae	AA941	AJ417	order	Enterobacterales	order	Enterobacterales	genus	Klebsiella	23800906; 24777092
KPN88:AA941	1	8020	55.611	b77570b8f93c56ac872755066714bbac	ColRNAI_rep_cluster_1857	000003__NC_002119_00001	MOBC	NC_009793_00003	-	-	-	-	mobilizable	CP032930	0.00473708	Klebsiella aerogenes	AA941	AJ417	order	Enterobacterales	order	Enterobacterales	genus	Klebsiella	23800906; 24777092
KPN124:AB978	2	43019	46.7305	cbd4a85d264192c3723f213068b23d7d	ColRNAI_rep_cluster_1857,rep_cluster_1367	000003__NC_002119_00001,000687__KX348146_00033	MOBC,MOBC	CP008826_00025,NC_009793_00003	-	-	-	-	mobilizable	CP019010	0.00638544	Escherichia coli	AB978	AK977	order	Enterobacterales	order	Enterobacterales	genus	Klebsiella	23800906; 24777092
KPN093:AA119	1	3801	46.6193	0ab0e26890c59de908092db6072414dd	ColRNAI_rep_cluster_1987	CP024554_00008	-	-	-	-	-	-	non-mobilizable	CP034764	0.000167546	Klebsiella pneumoniae	AA119	AH746	multi-phylla	Proteobacteria,Actinobacteria	multi-phylla	Proteobacteria,Actinobacteria	-	-	-
KPN094:AA103	1	4426	42.3633	8fbc5f95f6ead606e18cc03751ad67bd	ColRNAI_rep_cluster_1987	CP024554_00008	-	-	-	-	-	-	non-mobilizable	CP023252	0.00058191	Klebsiella pneumoniae	AA103	AH720	multi-phylla	Proteobacteria,Actinobacteria	multi-phylla	Proteobacteria,Actinobacteria	-	-	-
KPN094:AA110	1	3929	44.1588	c5d7496fd1c4f4acdf9ea0fd27a98d2e	ColRNAI_rep_cluster_1987	CP041116_00002	-	-	-	-	-	-	non-mobilizable	CP036325	0.000705841	Klebsiella pneumoniae	AA110	AH731	multi-phylla	Proteobacteria,Actinobacteria	multi-phylla	Proteobacteria,Actinobacteria	-	-	-
KPN100:AA104	1	4311	44.4212	85f45670876cbd0486c5114738a2a023	ColRNAI_rep_cluster_1987	CP041116_00002	-	-	-	-	-	-	non-mobilizable	CP012489	0.0394988	Enterobacter sp. FY-07	AA104	-	multi-phylla	Proteobacteria,Actinobacteria	multi-phylla	Proteobacteria,Actinobacteria	-	-	-
KPN123:AA531	1	3300	56.3333	b41fe9f74889961f124bed4d3559929c	ColRNAI_rep_cluster_1987	CP041116_00002	MOBP	NC_013090_00004	-	-	MOB_unknown	CP016722	mobilizable	CP016867	0.000264084	Salmonella enterica subsp. enterica serovar Typhimurium str. CDC 2010K-1587	AA531	AI714	multi-phylla	Actinobacteria,Proteobacteria	multi-phylla	Actinobacteria,Proteobacteria	-	-	-
KPN124:novel_4e084948b8e58876292e81c890012d71	1	4167	46.7723	4e084948b8e58876292e81c890012d71	ColRNAI_rep_cluster_1987	CP041116_00002	-	-	-	-	-	-	non-mobilizable	CP041116	0.0706202	Escherichia coli	novel_4e084948b8e58876292e81c890012d71	-	multi-phylla	Proteobacteria,Actinobacteria	multi-phylla	Proteobacteria,Actinobacteria	-	-	-
KPN128:AA109	1	4114	44.7982	a63fc10e128792befb43325971691726	ColRNAI_rep_cluster_1987	CP024554_00008	-	-	-	-	-	-	non-mobilizable	CP012558	0.0401734	Raoultella ornithinolytica	AA109	-	multi-phylla	Proteobacteria,Actinobacteria	multi-phylla	Proteobacteria,Actinobacteria	-	-	-
KPN131:AB048	1	4515	44.7176	2310f6e1113353174b98acc409c53638	ColRNAI_rep_cluster_1987	CP041116_00002	-	-	-	-	-	-	non-mobilizable	CP036189	0.0574401	Klebsiella pneumoniae	AB048	-	multi-phylla	Proteobacteria,Actinobacteria	multi-phylla	Proteobacteria,Actinobacteria	-	-	-
KPN135:AA113	1	3626	47.4628	2af057c71b40ad7b566c6d8f7c3e83b9	ColRNAI_rep_cluster_1987	CP041116_00002	-	-	-	-	-	-	non-mobilizable	CP031821	0.000855821	Klebsiella pneumoniae	AA113	AH736	multi-phylla	Proteobacteria,Actinobacteria	multi-phylla	Proteobacteria,Actinobacteria	-	-	-
KPN139:AA104	1	4312	44.9675	23e1254c451d76ce2a4edd1b333a29ea	ColRNAI_rep_cluster_1987	CP041116_00002	-	-	-	-	-	-	non-mobilizable	CP012489	0.0392331	Enterobacter sp. FY-07	AA104	-	multi-phylla	Proteobacteria,Actinobacteria	multi-phylla	Proteobacteria,Actinobacteria	-	-	-
KPN139:AA523	1	5687	48.6724	4d7a53b616f66d504323758a670a93fb	ColRNAI_rep_cluster_1987	CP041116_00002	-	-	-	-	MOB_unknown	CP016722	mobilizable	CP041735	0.00904645	Enterobacter hormaechei subsp. steigerwaltii	AA523	AI700	multi-phylla	Proteobacteria,Actinobacteria	multi-phylla	Proteobacteria,Actinobacteria	-	-	-
KPN152:novel_e129f6d54013ef6b7c90ac940477c6f4	1	2900	50.0345	e129f6d54013ef6b7c90ac940477c6f4	ColRNAI_rep_cluster_1987	CP041116_00002	-	-	-	-	MOB_unknown	CP016722	mobilizable	CP025238	0.0696435	Salmonella enterica subsp. enterica serovar Newport str. USDA-ARS-USMARC-1928	novel_e129f6d54013ef6b7c90ac940477c6f4	-	multi-phylla	Proteobacteria,Actinobacteria	multi-phylla	Proteobacteria,Actinobacteria	-	-	-
KPN157:AA103	1	4244	41.8473	b7809516a2d908ba29e03470ecc97445	ColRNAI_rep_cluster_1987	CP024554_00008	-	-	-	-	-	-	non-mobilizable	CP024435	0.000119496	Klebsiella pneumoniae	AA103	AH720	multi-phylla	Actinobacteria,Proteobacteria	multi-phylla	Actinobacteria,Proteobacteria	-	-	-
KPN158:AA106	1	5565	46.5588	62ce6921be5e0de5911c8d1c8496695b	ColRNAI_rep_cluster_1987	CP041116_00002	-	-	-	-	MOB_unknown	CP016722	mobilizable	CP041116	0.0535266	Escherichia coli	AA106	-	multi-phylla	Proteobacteria,Actinobacteria	multi-phylla	Proteobacteria,Actinobacteria	-	-	-
KPN167:AA531	1	3506	56.4176	e013cbf3345cac30612330732a7bd10a	ColRNAI_rep_cluster_1987	CP041116_00002	MOBP,MOBP	NC_013090_00004,CP011605_00002	-	-	MOB_unknown	CP016722	mobilizable	CP016867	0.000483446	Salmonella enterica subsp. enterica serovar Typhimurium str. CDC 2010K-1587	AA531	AI714	multi-phylla	Actinobacteria,Proteobacteria	multi-phylla	Actinobacteria,Proteobacteria	-	-	-
KPN172:AA111	1	5801	47.4401	b5856c517540c9f608847cdc6e8555a4	ColRNAI_rep_cluster_1987	CP024554_00008	-	-	-	-	-	-	non-mobilizable	CP024492	0.000167546	Klebsiella pneumoniae	AA111	AH733	multi-phylla	Proteobacteria,Actinobacteria	multi-phylla	Proteobacteria,Actinobacteria	-	-	-
KPN174:AA121	1	5068	45.1066	0a66c1ba759d61aa56ed05372fe73e0b	ColRNAI_rep_cluster_1987	CP024554_00008	-	-	-	-	-	-	non-mobilizable	CP035127	0.00105797	Escherichia coli	AA121	AH749	multi-phylla	Proteobacteria,Actinobacteria	multi-phylla	Proteobacteria,Actinobacteria	-	-	-
KPN176:AA123	1	3229	44.0074	75738bf928c704a09a083070a7d60b72	ColRNAI_rep_cluster_1987	CP024554_00008	-	-	-	-	-	-	non-mobilizable	CP023940	0.0531179	Klebsiella pneumoniae	AA123	-	multi-phylla	Actinobacteria,Proteobacteria	multi-phylla	Actinobacteria,Proteobacteria	-	-	-
KPN24:novel_ac92e06c74e6f8bc119d1f1041a68175	1	3397	47.3359	ac92e06c74e6f8bc119d1f1041a68175	ColRNAI_rep_cluster_1987	CP041116_00002	-	-	-	-	-	-	non-mobilizable	CP023940	0.0677629	Klebsiella pneumoniae	novel_ac92e06c74e6f8bc119d1f1041a68175	-	multi-phylla	Proteobacteria,Actinobacteria	multi-phylla	Proteobacteria,Actinobacteria	-	-	-
KPN40:AA108	1	4153	44.2331	b2dddc0f7e810e67b821f6bd8370474c	ColRNAI_rep_cluster_1987	CP041116_00002	-	-	-	-	-	-	non-mobilizable	CP023915	0.0025468	Klebsiella pneumoniae	AA108	AH729	multi-phylla	Proteobacteria,Actinobacteria	multi-phylla	Proteobacteria,Actinobacteria	-	-	-
KPN48:novel_ee7120c27adc2fbbb3517b21bda17ec1	1	4166	47.4796	ee7120c27adc2fbbb3517b21bda17ec1	ColRNAI_rep_cluster_1987	CP041116_00002	-	-	-	-	MOB_unknown	CP016722	mobilizable	CP023940	0.0755413	Klebsiella pneumoniae	novel_ee7120c27adc2fbbb3517b21bda17ec1	-	multi-phylla	Proteobacteria,Actinobacteria	multi-phylla	Proteobacteria,Actinobacteria	-	-	-
KPN50:AA113	1	2987	47.5728	ddca342c55d68a685d42ab052b8b1b1e	ColRNAI_rep_cluster_1987	CP024554_00008	-	-	-	-	-	-	non-mobilizable	CP024513	0.0145592	Klebsiella pneumoniae	AA113	AH736	multi-phylla	Proteobacteria,Actinobacteria	multi-phylla	Proteobacteria,Actinobacteria	-	-	-
KPN50:AA129	1	4359	42.9915	2553946ff9c32a847f23a84a5d848780	ColRNAI_rep_cluster_1987	CP024554_00008	-	-	-	-	-	-	non-mobilizable	CP024580	0.0124	Klebsiella pneumoniae	AA129	AH759	multi-phylla	Proteobacteria,Actinobacteria	multi-phylla	Proteobacteria,Actinobacteria	-	-	-
KPN73:AB058	1	4137	43.6548	aac61d84f55ef48d779407650a5c248a	ColRNAI_rep_cluster_1987	CP041116_00002	-	-	-	-	MOB_unknown	CP016722	mobilizable	CP039275	0.0326168	Salmonella enterica subsp. enterica serovar Senftenberg str. CFSAN004025	AB058	-	multi-phylla	Actinobacteria,Proteobacteria	multi-phylla	Actinobacteria,Proteobacteria	-	-	-
KPN80:AB047	1	6650	53.218	f0a480656c9a5a7ccf3e0ebe0480cdb7	ColRNAI_rep_cluster_1987	CP041116_00002	-	-	-	-	-	-	non-mobilizable	CP024491	0.000191626	Klebsiella pneumoniae	AB047	AJ595	multi-phylla	Proteobacteria,Actinobacteria	multi-phylla	Proteobacteria,Actinobacteria	-	-	-
KPN83:AA119	1	3751	46.6276	76e92565adfe14ca57fdb71f8256c1e0	ColRNAI_rep_cluster_1987	CP024554_00008	-	-	-	-	-	-	non-mobilizable	CP034764	0.000167546	Klebsiella pneumoniae	AA119	AH746	multi-phylla	Actinobacteria,Proteobacteria	multi-phylla	Actinobacteria,Proteobacteria	-	-	-
KPN133:AA131	1	4908	43.317	d26d103d635cfeed26160114ad10f0a9	ColRNAI_rep_cluster_1987,ColRNAI_rep_cluster_1987	000019__CP000651_00005,CP024554_00008	-	-	-	-	-	-	non-mobilizable	CP011315	0.000855821	Klebsiella pneumoniae subsp. pneumoniae	AA131	AH763	genus	Klebsiella	genus	Klebsiella	-	-	-
KPN139:AB041	1	2507	49.7806	d835c15210675194849d3319041f54e2	ColRNAI_rep_cluster_1987,ColRNAI_rep_cluster_1987	CP024554_00008,CP041116_00002	-	-	-	-	MOB_unknown	CP016722	mobilizable	CP041737	0.00126265	Enterobacter hormaechei subsp. steigerwaltii	AB041	AJ581	family	Enterobacteriaceae	family	Enterobacteriaceae	-	-	-
KPN148:AA459	9	78954	52.585	f56c9fd8ef1c4c84780013be0e518e05	ColRNAI_rep_cluster_1987,IncFIB,IncFII,rep_cluster_2183	CP024554_00008,000107__CP014778_00094,000128__CP023916,CP017721_00179	-	-	-	-	-	-	non-mobilizable	CP031851	0.047688	Klebsiella pneumoniae	AA459	-	multi-phylla	Proteobacteria,Actinobacteria	multi-phylla	Proteobacteria,Actinobacteria	order	Enterobacterales	11254626; 19482926; 15781495; 20851899; 16257053
KPN132:AA103	1	4094	41.2555	aa26234c95ec0f964af90157b71c67f0	ColRNAI_rep_cluster_1987,rep_cluster_2358	CP024554_00008,CP036198_00005	-	-	-	-	-	-	non-mobilizable	CP024435	0.000508006	Klebsiella pneumoniae	AA103	AH720	genus	Klebsiella	genus	Klebsiella	-	-	-
KPN141:AB041	1	2294	49.1718	56222be4955c7dc374a3b86a2d7096a3	ColRNAI_rep_cluster_1987,rep_cluster_2358	CP024554_00008,CP000974_00005	-	-	-	-	MOB_unknown	CP016722	mobilizable	CP041737	0.0026025	Enterobacter hormaechei subsp. steigerwaltii	AB041	AJ581	family	Enterobacteriaceae	family	Enterobacteriaceae	-	-	-
KPN44:AB045	1	3824	53.3473	4978f6ba34b2da232dfa507b629932d9	ColRNAI_rep_cluster_1987,rep_cluster_2358	CP041116_00002,CP000974_00005	MOBP	NC_019986_00002	-	-	MOB_unknown	CP016722	mobilizable	CP018357	0.00028831	Klebsiella oxytoca	AB045	AJ588	class	Gammaproteobacteria	class	Gammaproteobacteria	-	-	-
KPN094:novel_08122fcffdcabece373abb81972c57e2	3	11806	50.8386	08122fcffdcabece373abb81972c57e2	IncFIA	AF250878	-	-	-	-	MOBF	NZ_CP016035	mobilizable	CP020856	0.0671564	Klebsiella pneumoniae	novel_08122fcffdcabece373abb81972c57e2	-	order	Enterobacterales	order	Enterobacterales	order	Enterobacterales	10773089; 25389419; 19897651; 24247128; 20851899; 22511964
KPN133:AA833	8	60498	50.6595	d73488fe83e24ddddfa3c9663273f702	IncFIA	AF250878	-	-	-	-	-	-	non-mobilizable	CP035197	0.0489202	Klebsiella pneumoniae	AA833	-	order	Enterobacterales	order	Enterobacterales	order	Enterobacterales	10773089; 25389419; 19897651; 24247128; 20851899; 22511964
KPN135:AA050	6	51433	50.7592	990f652b1acc50ee2b3d4a189bb052e3	IncFIA	AF250878	-	-	-	-	MOBF	NZ_CP016035	mobilizable	CP031940	0.00430121	Klebsiella pneumoniae	AA050	AH639	order	Enterobacterales	order	Enterobacterales	order	Enterobacterales	10773089; 25389419; 19897651; 24247128; 20851899; 22511964
KPN141:AA033	3	176883	52.0694	2c5b14632a28a2b5760956ab06877b2f	IncFIA	AF250878	MOBF,MOBF	CP035180_00077,NC_021231_00058	MPF_F	NC_014312_00116,NC_014312_00118,NC_023332_00154,NC_019389_00068,NC_014312_00128,NC_022609_00081,NC_019389_00080,NC_021654_00016,NC_019165_00034,NC_019155_00032,NC_021502_00131,NC_021502_00150	-	-	conjugative	CP018670	0.0260597	Klebsiella pneumoniae	AA033	-	order	Enterobacterales	order	Enterobacterales	order	Enterobacterales	10773089; 25389419; 19897651; 24247128; 20851899; 22511964
KPN157:novel_faaa265ff453d27c4c0a798e54b8ad1e	1	5410	48.1146	faaa265ff453d27c4c0a798e54b8ad1e	IncFIA	AF250878	-	-	-	-	MOBF	NZ_CP016035	mobilizable	CP020531	0.0755413	Enterobacter cloacae	novel_faaa265ff453d27c4c0a798e54b8ad1e	-	order	Enterobacterales	order	Enterobacterales	order	Enterobacterales	10773089; 25389419; 19897651; 24247128; 20851899; 22511964
KPN35:AA357	7	49266	54.084	918fd6dc551d64aba8c6a6bf495dd125	IncFIA	AF250878	-	-	-	-	-	-	non-mobilizable	CP021900	0.00924552	Enterobacter cloacae	AA357	AI322	order	Enterobacterales	order	Enterobacterales	order	Enterobacterales	10773089; 25389419; 19897651; 24247128; 20851899; 22511964
KPN53:AC434	3	20654	53.1665	29e2debc33f802c9f782ef634949ed64	IncFIA	AF250878	-	-	-	-	MOBF	NZ_CP016035	mobilizable	CP014125	0.0463343	Klebsiella pneumoniae	AC434	-	order	Enterobacterales	order	Enterobacterales	order	Enterobacterales	10773089; 25389419; 19897651; 24247128; 20851899; 22511964
KPN73:AA048	3	15791	45.7349	5ccd42d93cbc95ee5fae530297861a69	IncFIA	AF250878	-	-	-	-	MOBF	NZ_CP013834	mobilizable	CP035201	0.0365754	Klebsiella pneumoniae	AA048	-	order	Enterobacterales	order	Enterobacterales	order	Enterobacterales	10773089; 25389419; 19897651; 24247128; 20851899; 22511964
KPN148:AA336	2	73836	50.2885	c10938a78c0b52fb7c7108a5aa414d04	IncFIA,IncFIC	MK878891_00042,AP001918	MOBF	NC_017627_00068	MPF_F	NC_022651_00077,NC_010409_00124,NC_019094_00090,NC_017639_00094,NC_007675_00027,NC_017639_00100,NC_018966_00040,NC_019094_00068,NC_009837_00049,NC_013437_00116,08-5333_00200	MOBF	CP016713	conjugative	CP041530	0.00279888	Escherichia coli	AA336	AI259	family	Enterobacteriaceae	family	Enterobacteriaceae	-	-	-
KPN51:AA307	1	60011	50.6341	dd307d9872d1f1ef99b8329780db5caf	IncFIA,IncFIC	CP022610_00144,AY458016	MOBF	NC_017627_00068	MPF_F	NC_022651_00077,NC_010409_00124,NC_019094_00090,NC_017639_00094,NC_007675_00027,NC_017054_00096,NC_019037_00027,NC_019094_00068,NC_009837_00049,NC_013437_00116,08-5333_00200	MOBF	CP015086	conjugative	CP027455	0.0299949	Escherichia coli	AA307	-	family	Enterobacteriaceae	family	Enterobacteriaceae	-	-	-
KPN69:AA334	4	55543	51.5547	1ef45e5b9060a36eb7126d98b5863dd3	IncFIA,IncFIC	000136__AP014877_00014,AY458016	MOBF	NC_017627_00068	MPF_F	NC_008460_00107,NC_010488_00021,NC_019037_00027,NC_017639_00100,NC_007675_00027,NC_017639_00094,NC_019094_00090,NC_010409_00124,NC_022651_00077,NC_013437_00116,08-5333_00200	MOBF	KT754162	conjugative	CP010138	0.0122141	Escherichia coli	AA334	AI250	family	Enterobacteriaceae	family	Enterobacteriaceae	-	-	-
KPN70:AA334	4	61085	52.1241	0836e1219ff53a57174412cf4fc63363	IncFIA,IncFIC	000136__AP014877_00014,AY458016	MOBF	NC_017627_00068	MPF_F	NC_008460_00107,NC_010488_00021,NC_019037_00027,NC_017639_00100,NC_007675_00027,NC_017639_00094,NC_019094_00090,NC_010409_00124,NC_022651_00077,NC_013437_00116,08-5333_00200	MOBF	KT754162	conjugative	CP010138	0.00940624	Escherichia coli	AA334	AI250	family	Enterobacteriaceae	family	Enterobacteriaceae	-	-	-
KPN095:AA334	7	108357	51.8868	aedf504415cad965bc58293976e8e52b	IncFIA,IncFIC,IncFIB	000136__AP014877_00014,AY458016,000096__NC_019117_00097	MOBF	NC_017627_00068	MPF_F	NC_008460_00107,NC_010488_00021,NC_019037_00027,NC_017639_00100,NC_007675_00027,NC_017639_00094,NC_019094_00090,NC_010409_00124,NC_022651_00077,NC_013437_00116,08-5333_00200	MOBF	KT754162	conjugative	CP023821	0.00652391	Escherichia coli	AA334	AI251	order	Enterobacterales	order	Enterobacterales	order	Enterobacterales	11254626; 19482926; 15781495; 20851899; 16257053
KPN095:AA357	10	122420	53.8458	5abc5a3c322ba2b6f0d936c443fab1ec	IncFIA,IncFII	AF250878,KF954760	MOBF,MOBF	NC_021231_00058,CP035180_00077	MPF_F	NC_023905_00125,NC_019165_00034,NC_021654_00016,NC_019389_00080,NC_022609_00081,NC_014312_00128,NC_019389_00068,NC_023332_00154,NC_014312_00118,NC_014312_00116,NC_021502_00150,NC_021502_00131	-	-	conjugative	CP025039	0.00369655	Klebsiella pneumoniae	AA357	AI321	order	Enterobacterales	order	Enterobacterales	order	Enterobacterales	10773089; 25389419; 19897651; 24247128; 20851899; 22511964
KPN69:AA357	11	123000	53.9073	1dc04a459c9990dfd9e599745f3ef5c4	IncFIA,IncFII	AF250878,KF954760	MOBF,MOBF	NC_021231_00058,CP035180_00077	MPF_F	NC_023905_00125,NC_019165_00034,NC_021654_00016,NC_019389_00080,NC_022609_00081,NC_014312_00128,NC_019389_00068,NC_023332_00154,NC_014312_00118,NC_014312_00116,NC_021502_00150,NC_021502_00131	-	-	conjugative	CP025039	0.00354859	Klebsiella pneumoniae	AA357	AI321	order	Enterobacterales	order	Enterobacterales	order	Enterobacterales	10773089; 25389419; 19897651; 24247128; 20851899; 22511964
KPN70:AA357	9	121993	53.8523	6d649ebda138bbd8b861e26ac0165f8d	IncFIA,IncFII	AF250878,KF954760	MOBF,MOBF	NC_021231_00058,CP035180_00077	MPF_F	NC_023905_00125,NC_019165_00034,NC_021654_00016,NC_019389_00080,NC_022609_00081,NC_014312_00128,NC_019389_00068,NC_023332_00154,NC_014312_00118,NC_014312_00116,NC_021502_00150,NC_021502_00131	-	-	conjugative	CP025039	0.00366686	Klebsiella pneumoniae	AA357	AI321	order	Enterobacterales	order	Enterobacterales	order	Enterobacterales	10773089; 25389419; 19897651; 24247128; 20851899; 22511964
KPN104:AA357	24	126653	51.8764	1fb5de2fd082d9d09416f01fcf2a33fb	IncFIA,IncFII,IncFII,IncX3	AF250878,000129__CP018340,KF954760,000221__NC_025130_00012	MOBP	NC_020552_00059	MPF_T	NC_017624_00009,NC_019083_00030	-	-	conjugative	CP009776	0.0108269	Klebsiella pneumoniae subsp. pneumoniae	AA357	AI322	order	Enterobacterales	order	Enterobacterales	order	Enterobacterales	10773089; 25389419; 19897651; 24247128; 22470007; 26842776; 20851899; 22511964
KPN151:AA357	20	176458	52.6227	502de6e9a04c749f5757597cb8498370	IncFIA,IncFII,IncX3,rep_cluster_1418	AF250878,000129__CP018340,000221__NC_025130_00012,000759__NC_013950_00034	MOBF,MOBP	CP024544_00079,NC_020552_00059	MPF_F	NC_019155_00032,NC_019165_00034,NC_021654_00016,NC_019389_00080,NC_022609_00081,NC_021502_00150,NC_017624_00009,NC_019083_00030	-	-	conjugative	CP009776	0.0208822	Klebsiella pneumoniae subsp. pneumoniae	AA357	AI322	order	Enterobacterales	order	Enterobacterales	order	Enterobacterales	10773089; 16940067; 25389419; 19897651; 24247128; 22470007; 26842776; 20851899; 22511964
KPN166:AA357	22	179752	52.6609	35f6dfbc533929a7e051fb92bb57d095	IncFIA,IncFII,IncX3,rep_cluster_1418	AF250878,000129__CP018340,000221__NC_025130_00012,000759__NC_013950_00034	MOBF,MOBP	CP024544_00079,NC_020552_00059	MPF_F	NC_019155_00032,NC_019165_00034,NC_021654_00016,NC_019389_00080,NC_022609_00081,NC_021502_00150,NC_017624_00009,NC_019083_00030	-	-	conjugative	CP009776	0.0212234	Klebsiella pneumoniae subsp. pneumoniae	AA357	AI322	order	Enterobacterales	order	Enterobacterales	order	Enterobacterales	10773089; 16940067; 25389419; 19897651; 24247128; 22470007; 26842776; 20851899; 22511964
KPN3:AA357	22	125558	51.2942	277ff421d55390a8462d36c53ab35249	IncFIA,IncFII,IncX3,rep_cluster_1418	AF250878,KF954760,000221__NC_025130_00012,000759__NC_013950_00034	MOBP	NC_020552_00059	MPF_T	NC_019083_00030,NC_017624_00009,NC_019389_00068,NC_021502_00131	-	-	conjugative	CP010881	0.0155619	Escherichia coli	AA357	AI322	order	Enterobacterales	order	Enterobacterales	order	Enterobacterales	10773089; 16940067; 25389419; 19897651; 24247128; 22470007; 26842776; 20851899; 22511964
KPN107:AA357	15	107929	53.6251	b090112c4da608c8c29233b268651e41	IncFIA,IncFII,rep_cluster_1418	AF250878,KF954760,000759__NC_013950_00034	-	-	-	-	-	-	non-mobilizable	CP025039	0.0140492	Klebsiella pneumoniae	AA357	AI321	order	Enterobacterales	order	Enterobacterales	order	Enterobacterales	10773089; 16940067; 25389419; 19897651; 24247128; 20851899; 22511964
KPN18:AA357	15	118773	53.6385	ddec987e340dc90bce1acda0d67f92cc	IncFIA,IncFII,rep_cluster_1418	AF250878,KF954760,000759__NC_013950_00034	-	-	-	-	-	-	non-mobilizable	CP025039	0.0144562	Klebsiella pneumoniae	AA357	AI321	order	Enterobacterales	order	Enterobacterales	order	Enterobacterales	10773089; 16940067; 25389419; 19897651; 24247128; 20851899; 22511964
KPN103:AF571	9	123119	52.1804	e25d18ed1754c1c54b67e5b5936654dd	IncFIA,IncFII,rep_cluster_2183	AF250878,000130__CP023489,CP017721_00179	MOBF	CP045692_00039	-	-	-	-	mobilizable	MH569712	0.0218499	Serratia marcescens subsp. marcescens	AF571	AP538	order	Enterobacterales	order	Enterobacterales	order	Enterobacterales	10773089; 25389419; 19897651; 24247128; 20851899; 22511964
KPN49:AA456	5	93273	49.8547	6a7660106990fb12bb16bf73e24c0820	IncFIA,IncFII,rep_cluster_2183	AF250878,000126__FO834904,CP017721_00179	MOBF,MOBF	NC_021231_00058,CP035180_00077	MPF_F	NC_019155_00032,NC_019165_00034,NC_021654_00016,NC_019389_00080,NC_022609_00081,NC_014312_00128,NC_021231_00085,NC_023332_00154,NC_014312_00118,NC_014312_00116,NC_021502_00150,NC_021502_00131	-	-	conjugative	FO834904	0.000508006	Klebsiella pneumoniae	AA456	AI559	order	Enterobacterales	order	Enterobacterales	order	Enterobacterales	10773089; 25389419; 19897651; 24247128; 20851899; 22511964
KPN150:AE437	11	187372	51.2814	fbc40ffc410310659c54f35932768b7f	IncFIA,IncFII,rep_cluster_2183,IncFIB	AF250878,000126__FO834904,CP017721_00179,000107__CP014778_00094	MOBF,MOBF	NC_021231_00058,CP035180_00077	MPF_F	NC_019155_00032,NC_019165_00034,NC_021654_00016,NC_019389_00080,NC_022609_00081,NC_014312_00128,NC_021231_00085,NC_023332_00154,NC_014312_00118,NC_014312_00116,NC_021502_00150,NC_021502_00131	-	-	conjugative	CP015754	0.0250805	Klebsiella pneumoniae	AE437	-	order	Enterobacterales	order	Enterobacterales	order	Enterobacterales	11254626; 19482926; 15781495; 20851899; 16257053
KPN80:AA457	11	101402	53.0532	4632ce3969d26353979f4c212d932c6c	IncFIA,IncFII,rep_cluster_2183,rep_cluster_2183	AF250878,000128__CP023916,CP017721_00179,CP017721_00179	MOBF,MOBF	NC_021231_00058,CP035180_00077	MPF_T	NC_021502_00150	-	-	conjugative	AP018749	0.0374354	Klebsiella pneumoniae	AA457	-	order	Enterobacterales	order	Enterobacterales	order	Enterobacterales	10773089; 25389419; 20547789; 19897651; 24247128; 20851899; 22511964
KPN093:AB181	16	73207	49.7248	456bc78728e5d0a2a030e8af5aefde73	IncFIA,IncR	AF250878,000204__CP008701_00115	-	-	-	-	MOBF	NZ_CP013834	mobilizable	CP031581	0.00723198	Klebsiella pneumoniae	AB181	AJ821	order	Enterobacterales	order	Enterobacterales	order	Enterobacterales	10773089; 25389419; 19897651; 23711894; 24247128; 20851899; 22511964
KPN164:AF460	3	60341	48.7612	a401b5cd68631f1bda93d9898152c95e	IncFIA,IncR	AF250878,000204__CP008701_00115	MOBH	NC_016980_00239	MPF_F	NC_018107_00101	-	-	conjugative	CP042869	0.0463343	Escherichia coli	AF460	-	family	Enterobacteriaceae	family	Enterobacteriaceae	-	-	-
KPN83:AB181	16	69538	49.488	14a62aa7f77efacdf70b0a6f26d52125	IncFIA,IncR	AF250878,000204__CP008701_00115	-	-	-	-	MOBF	NZ_CP013834	mobilizable	CP031581	0.00892796	Klebsiella pneumoniae	AB181	AJ821	order	Enterobacterales	order	Enterobacterales	order	Enterobacterales	10773089; 25389419; 19897651; 23711894; 24247128; 20851899; 22511964
KPN093:AA449	10	105655	53.2999	c9294d781c9fee934f5c69a665fc9f47	IncFIB	000107__CP014778_00094	MOBF,MOBF	NC_021231_00058,CP035180_00077	MPF_F	NC_022609_00095,NC_019165_00034,NC_021654_00016,NC_019389_00080,NC_022609_00081,NC_014312_00128,NC_019389_00068,NC_023332_00154,NC_014312_00118,NC_014312_00116,NC_021502_00150,NC_021502_00131	-	-	conjugative	NC_015154	0.0317837	Klebsiella pneumoniae	AA449	-	order	Enterobacterales	order	Enterobacterales	order	Enterobacterales	11254626; 19482926; 15781495; 20851899; 16257053
KPN098:novel_2ee0dcecfad252ba2a63d31123dcaff4	5	25442	49.7917	2ee0dcecfad252ba2a63d31123dcaff4	IncFIB	000107__CP014778_00094	-	-	-	-	-	-	non-mobilizable	CP045558	0.0898429	Citrobacter sp. S39	novel_2ee0dcecfad252ba2a63d31123dcaff4	-	order	Enterobacterales	order	Enterobacterales	order	Enterobacterales	11254626; 19482926; 15781495; 20851899; 16257053
KPN103:AA274	7	96613	52.0582	0820890b0cbbc0ea5a63469a101c9779	IncFIB	000107__CP014778_00094	-	-	-	-	-	-	non-mobilizable	CP025817	0.00861543	Klebsiella pneumoniae	AA274	AI073	order	Enterobacterales	order	Enterobacterales	order	Enterobacterales	11254626; 19482926; 15781495; 20851899; 16257053
KPN104:AA404	8	206683	44.232	0dd716a6115292cc9217b362aa6a4518	IncFIB	CP024497_00001	MOBH	NC_016980_00239	MPF_F	NC_016980_00110,NC_016980_00109,NC_018107_00235,NC_023911_00309,NC_016980_00099,NC_016980_00240,NC_018107_00101	-	-	conjugative	CP024497	0.0224927	Klebsiella pneumoniae	AA404	AI432	order	Enterobacterales	order	Enterobacterales	order	Enterobacterales	11254626; 19482926; 15781495; 20851899; 16257053
KPN115:AC125	2	113527	49.0571	a9b9c2b774078d16fc3284338a6296f4	IncFIB	000100__NZ_CP016161_00012	-	-	-	-	-	-	non-mobilizable	CP044030	0.00181236	Klebsiella pneumoniae	AC125	AL184	order	Enterobacterales	order	Enterobacterales	order	Enterobacterales	11254626; 19482926; 15781495; 20851899; 16257053
KPN116:AC125	1	109864	49.3173	3a802f76baceaaee86f798a09ea71525	IncFIB	000100__NZ_CP016161_00012	-	-	-	-	-	-	non-mobilizable	MF144193	0.0129677	Klebsiella pneumoniae	AC125	AL188	order	Enterobacterales	order	Enterobacterales	order	Enterobacterales	11254626; 19482926; 15781495; 20851899; 16257053
KPN117:AA276	9	141592	51.1915	73095273dc5b3aba6455a0e9a7e80eaa	IncFIB	000107__CP014778_00094	MOBF,MOBF	CP035180_00077,NC_021231_00058	MPF_F	NC_014312_00116,NC_014312_00118,NC_023332_00154,NC_019389_00068,NC_014312_00128,NC_022609_00081,NC_011281_00082,NC_021654_00016,NC_019165_00034,NC_019155_00032,NC_021502_00131,NC_021502_00150	-	-	conjugative	CP021166	0.00170624	Klebsiella pneumoniae	AA276	AI084	order	Enterobacterales	order	Enterobacterales	order	Enterobacterales	11254626; 19482926; 15781495; 20851899; 16257053
KPN118:AA816	7	119311	50.1043	e7c4d8d4290bb6ec2868b5c6e3341600	IncFIB	000107__CP014778_00094	-	-	-	-	-	-	non-mobilizable	CP031799	0.0143537	Klebsiella pneumoniae	AA816	AJ186	order	Enterobacterales	order	Enterobacterales	order	Enterobacterales	11254626; 19482926; 15781495; 20851899; 16257053
KPN118:AC125	3	112683	48.9178	24837e5e8c51eea80b2512d1ac9a74e0	IncFIB	000100__NZ_CP016161_00012	-	-	-	-	-	-	non-mobilizable	CP044046	0.00060662	Klebsiella pneumoniae	AC125	AL184	order	Enterobacterales	order	Enterobacterales	order	Enterobacterales	11254626; 19482926; 15781495; 20851899; 16257053
KPN119:AA814	10	59151	50.5773	b542a7e04b470541db7ccb4effd1fba3	IncFIB	000107__CP014778_00094	MOBH	CP023978_00085	-	-	-	-	mobilizable	CP028549	0.0588483	Klebsiella variicola	AA814	-	order	Enterobacterales	order	Enterobacterales	order	Enterobacterales	11254626; 19482926; 15781495; 20851899; 16257053
KPN125:AA275	3	124446	52.6429	654d4c094c08aa986bceb79ff09c987d	IncFIB	000107__CP014778_00094	MOBF,MOBF	NC_021231_00058,CP035180_00077	MPF_T	NC_021502_00150	-	-	conjugative	CP036443	0.037311	Klebsiella pneumoniae	AA275	-	order	Enterobacterales	order	Enterobacterales	order	Enterobacterales	11254626; 19482926; 15781495; 20851899; 16257053
KPN128:AD443	11	106137	51.9593	792738c4249a5b14122a517af61b31d9	IncFIB	000107__CP014778_00094	-	-	-	-	-	-	non-mobilizable	CP025683	0.0107836	Klebsiella pneumoniae	AD443	AN002	order	Enterobacterales	order	Enterobacterales	order	Enterobacterales	11254626; 19482926; 15781495; 20851899; 16257053
KPN130:AD443	15	124631	51.9686	2ed9e16b6e89db851fde2b74f5fb8225	IncFIB	000107__CP014778_00094	-	-	-	-	-	-	non-mobilizable	CP012989	0.00282712	Klebsiella pneumoniae	AD443	AN002	order	Enterobacterales	order	Enterobacterales	order	Enterobacterales	11254626; 19482926; 15781495; 20851899; 16257053
KPN131:AA277	9	199395	52.6508	46e02dc4e4d6126febeabe311f02d663	IncFIB	000107__CP014778_00094	MOBF,MOBF	CP035180_00077,NC_021231_00058	MPF_F	NC_021502_00150,NC_019155_00032,NC_019165_00034,NC_021654_00016,NC_011281_00082,NC_022609_00081,NC_014312_00128,NC_019389_00068,NC_023332_00154,NC_014312_00118,NC_014312_00116,NC_021502_00131	-	-	conjugative	CP030071	0.0102718	Klebsiella pneumoniae	AA277	AI090	order	Enterobacterales	order	Enterobacterales	order	Enterobacterales	11254626; 19482926; 15781495; 20851899; 16257053
KPN134:AA816	11	134077	50.7425	968687dcfac1274b616dc8cb0cd84088	IncFIB	000107__CP014778_00094	-	-	-	-	-	-	non-mobilizable	CP031799	0.0134525	Klebsiella pneumoniae	AA816	AJ186	order	Enterobacterales	order	Enterobacterales	order	Enterobacterales	11254626; 19482926; 15781495; 20851899; 16257053
KPN137:AA275	17	197845	53.364	e27889b0122e255e052b425b5a88f6d0	IncFIB	000107__CP014778_00094	MOBF,MOBF	CP035180_00077,NC_021231_00058	MPF_F	NC_021502_00150,NC_021654_00016,NC_019389_00080,NC_022609_00081,NC_014312_00128,NC_021654_00004,NC_023332_00154,NC_014312_00118,NC_014312_00116,NC_021502_00131,NC_019165_00034,NC_019155_00032	-	-	conjugative	CP036443	0.00375609	Klebsiella pneumoniae	AA275	AI076	order	Enterobacterales	order	Enterobacterales	order	Enterobacterales	11254626; 19482926; 15781495; 20851899; 16257053
KPN138:AD443	13	114723	51.7211	97d26716d808d6e5f834daca1962d4e9	IncFIB	000107__CP014778_00094	-	-	-	-	-	-	non-mobilizable	CP012989	0.00294054	Klebsiella pneumoniae	AD443	AN002	order	Enterobacterales	order	Enterobacterales	order	Enterobacterales	11254626; 19482926; 15781495; 20851899; 16257053
KPN141:AA816	6	110006	49.3955	5f34a5a8d6f6365968e7e87c79d3b98e	IncFIB	000107__CP014778_00094	-	-	-	-	-	-	non-mobilizable	CP033758	0.0263104	Klebsiella pneumoniae	AA816	-	order	Enterobacterales	order	Enterobacterales	order	Enterobacterales	11254626; 19482926; 15781495; 20851899; 16257053
KPN144:AA277	4	81284	51.0445	9d1fe1c1de133f6261ceec1208b3b233	IncFIB	000107__CP014778_00094	-	-	-	-	-	-	non-mobilizable	KY271405	0.0117564	Klebsiella pneumoniae	AA277	AI092	order	Enterobacterales	order	Enterobacterales	order	Enterobacterales	11254626; 19482926; 15781495; 20851899; 16257053
KPN144:AC125	1	109778	49.253	c3843120ce77f08b1e35ecdb673bdbfb	IncFIB	000100__NZ_CP016161_00012	-	-	-	-	-	-	non-mobilizable	CP031791	0.000119496	Klebsiella pneumoniae	AC125	AL189	order	Enterobacterales	order	Enterobacterales	order	Enterobacterales	11254626; 19482926; 15781495; 20851899; 16257053
KPN146:AD443	17	110919	51.7396	a16b9ac4bbb21883c1e2ce4a8aeec1d2	IncFIB	000107__CP014778_00094	-	-	-	-	-	-	non-mobilizable	CP025683	0.00997914	Klebsiella pneumoniae	AD443	AN002	order	Enterobacterales	order	Enterobacterales	order	Enterobacterales	11254626; 19482926; 15781495; 20851899; 16257053
KPN155:AA814	13	149864	51.2351	dd2d5b841c850372d3ba0d4b9e83aee3	IncFIB	000107__CP014778_00094	MOBH	CP023978_00085	-	-	-	-	mobilizable	CP028549	0.0326168	Klebsiella variicola	AA814	-	order	Enterobacterales	order	Enterobacterales	order	Enterobacterales	11254626; 19482926; 15781495; 20851899; 16257053
KPN157:AA817	14	95690	50.5884	02bee171d97b5011af4be2abe94fb030	IncFIB	000107__CP014778_00094	-	-	-	-	-	-	non-mobilizable	CP045662	0.026819	Klebsiella pneumoniae	AA817	-	order	Enterobacterales	order	Enterobacterales	order	Enterobacterales	11254626; 19482926; 15781495; 20851899; 16257053
KPN162:AD443	17	145985	51.5724	6c93b8f4db2b8850b0a0bb078ed0e309	IncFIB	000107__CP014778_00094	-	-	-	-	-	-	non-mobilizable	CP032173	0.000458924	Klebsiella pneumoniae	AD443	AN001	order	Enterobacterales	order	Enterobacterales	order	Enterobacterales	11254626; 19482926; 15781495; 20851899; 16257053
KPN165:AA398	2	86989	49.0924	b902bf128a548ddd65bb2740843b78ab	IncFIB	000107__CP014778_00094	MOBH	NC_016980_00239	-	-	-	-	mobilizable	FO834905	0.0100207	Klebsiella pneumoniae	AA398	AI421	order	Enterobacterales	order	Enterobacterales	order	Enterobacterales	11254626; 19482926; 15781495; 20851899; 16257053
KPN167:AA275	14	171329	52.2019	d3aab985bafc18c05d2dd012a570a38e	IncFIB	000107__CP014778_00094	MOBF,MOBF	CP035180_00077,NC_021231_00058	MPF_F	NC_021502_00150,NC_014312_00118,NC_023332_00154,NC_019389_00068,NC_014312_00128,NC_022609_00081,NC_011281_00082,NC_021654_00016,NC_019165_00034,NC_019155_00032,NC_021502_00131,NC_014312_00116	-	-	conjugative	CP025142	0.0124935	Klebsiella pneumoniae	AA275	AI076	order	Enterobacterales	order	Enterobacterales	order	Enterobacterales	11254626; 19482926; 15781495; 20851899; 16257053
KPN168:AA275	14	182913	53.5347	483326d0120280ee089a76907ee1705f	IncFIB	000107__CP014778_00094	MOBF,MOBF	CP035180_00077,NC_021231_00058	MPF_F	NC_014312_00116,NC_014312_00118,NC_023332_00154,NC_021654_00004,NC_014312_00128,NC_022609_00081,NC_019389_00080,NC_021654_00016,NC_019165_00034,NC_019155_00032,NC_021502_00131,NC_021502_00150	-	-	conjugative	CP041100	0.00597612	Klebsiella pneumoniae subsp. pneumoniae	AA275	AI074	order	Enterobacterales	order	Enterobacterales	order	Enterobacterales	11254626; 19482926; 15781495; 20851899; 16257053
KPN17:AA277	25	161211	52.52	c0061e792f3876b2442e6b28d6f5fe84	IncFIB	000107__CP014778_00094	-	-	-	-	-	-	non-mobilizable	CP041936	0.0102718	Klebsiella pneumoniae	AA277	AI086	order	Enterobacterales	order	Enterobacterales	order	Enterobacterales	11254626; 19482926; 15781495; 20851899; 16257053
KPN170:AC125	1	110990	49.063	399d4680a9a6af12b2f78104583761ae	IncFIB	000100__NZ_CP016161_00012	-	-	-	-	-	-	non-mobilizable	CP031803	0.015998	Klebsiella pneumoniae	AC125	AL188	order	Enterobacterales	order	Enterobacterales	order	Enterobacterales	11254626; 19482926; 15781495; 20851899; 16257053
KPN171:AA277	8	154555	52.2274	6257c3206c6bcd3c9d168691e5e39539	IncFIB	000107__CP014778_00094	-	-	MPF_F	NC_019155_00032,NC_019165_00034,NC_021654_00016,NC_011281_00082,NC_022609_00081,NC_014312_00128,NC_019389_00068,NC_023332_00154,NC_014312_00118,NC_014312_00116,NC_021502_00131	-	-	non-mobilizable	CP030071	0.00770681	Klebsiella pneumoniae	AA277	AI090	order	Enterobacterales	order	Enterobacterales	order	Enterobacterales	11254626; 19482926; 15781495; 20851899; 16257053
KPN172:novel_3a87af47abf017df8d6e1cabc581b2fe	5	17001	50.6558	3a87af47abf017df8d6e1cabc581b2fe	IncFIB	000107__CP014778_00094	-	-	-	-	-	-	non-mobilizable	CP026180	0.0744324	Klebsiella pneumoniae	novel_3a87af47abf017df8d6e1cabc581b2fe	-	order	Enterobacterales	order	Enterobacterales	order	Enterobacterales	11254626; 19482926; 15781495; 20851899; 16257053
KPN173:AA816	15	137949	50.046	5ccadcc5e89acae54d7845cdb8af567b	IncFIB	000107__CP014778_00094	-	-	-	-	-	-	non-mobilizable	CP031799	0.00892796	Klebsiella pneumoniae	AA816	AJ186	order	Enterobacterales	order	Enterobacterales	order	Enterobacterales	11254626; 19482926; 15781495; 20851899; 16257053
KPN174:AA035	12	108039	53.328	3f093fe4b52ebf8891c3d5d5627ce25e	IncFIB	000107__CP014778_00094	MOBF,MOBF	NC_021231_00058,CP035180_00077	MPF_F	NC_021502_00150,NC_019155_00032,NC_019165_00034,NC_021654_00016,NC_019389_00080,NC_022609_00081,NC_014312_00128,NC_019389_00068,NC_023332_00154,NC_014312_00118,NC_014312_00116,NC_021502_00131	-	-	conjugative	CP026175	0.0335842	Klebsiella pneumoniae	AA035	-	order	Enterobacterales	order	Enterobacterales	order	Enterobacterales	11254626; 19482926; 15781495; 20851899; 16257053
KPN174:AC125	3	111301	49.2754	920405da1d0c3d960683ad926737e0a5	IncFIB	000100__NZ_CP016161_00012	-	-	-	-	-	-	non-mobilizable	LR134218	0.0136991	Klebsiella aerogenes	AC125	AL183	order	Enterobacterales	order	Enterobacterales	order	Enterobacterales	11254626; 19482926; 15781495; 20851899; 16257053
KPN175:AA277	8	154684	52.2284	2439bb15ce0e1394001a16870f5bdbb0	IncFIB	000107__CP014778_00094	-	-	MPF_F	NC_019155_00032,NC_019165_00034,NC_021654_00016,NC_011281_00082,NC_022609_00081,NC_014312_00128,NC_019389_00068,NC_023332_00154,NC_014312_00118,NC_014312_00116,NC_021502_00131	-	-	non-mobilizable	CP030071	0.00770681	Klebsiella pneumoniae	AA277	AI090	order	Enterobacterales	order	Enterobacterales	order	Enterobacterales	11254626; 19482926; 15781495; 20851899; 16257053
KPN176:AA459	5	42554	52.5239	a56a30ecc72e45cf30d432557d07a6c8	IncFIB	000107__CP014778_00094	-	-	-	-	-	-	non-mobilizable	CP031851	0.0543589	Klebsiella pneumoniae	AA459	-	order	Enterobacterales	order	Enterobacterales	order	Enterobacterales	11254626; 19482926; 15781495; 20851899; 16257053
KPN177:novel_2066c9074227e381a6079f60a2711c8e	3	24372	51.272	2066c9074227e381a6079f60a2711c8e	IncFIB	000107__CP014778_00094	-	-	-	-	-	-	non-mobilizable	CP045217	0.0702918	Pantoea dispersa	novel_2066c9074227e381a6079f60a2711c8e	-	order	Enterobacterales	order	Enterobacterales	order	Enterobacterales	11254626; 19482926; 15781495; 20851899; 16257053
KPN178:AC125	1	109286	49.3604	ab1e6a93ff1bbe4d73e57aa2aa64c601	IncFIB	000100__NZ_CP016161_00012	-	-	-	-	-	-	non-mobilizable	CP041101	0.0115761	Klebsiella pneumoniae subsp. pneumoniae	AC125	AL183	order	Enterobacterales	order	Enterobacterales	order	Enterobacterales	11254626; 19482926; 15781495; 20851899; 16257053
KPN25:AA274	7	91386	52.3592	9fc0e8a6e1577cea545d29298a5c65ef	IncFIB	000107__CP014778_00094	-	-	-	-	-	-	non-mobilizable	CP025817	0.00470559	Klebsiella pneumoniae	AA274	AI073	order	Enterobacterales	order	Enterobacterales	order	Enterobacterales	11254626; 19482926; 15781495; 20851899; 16257053
KPN25:AC125	1	111487	49.5098	d40463fd241692c2c82c7ade2a265474	IncFIB	000100__NZ_CP016161_00012	-	-	-	-	-	-	non-mobilizable	CP021714	0.00128842	Klebsiella pneumoniae	AC125	AL188	order	Enterobacterales	order	Enterobacterales	order	Enterobacterales	11254626; 19482926; 15781495; 20851899; 16257053
KPN28:AD443	14	134339	51.8137	8c3b915bb92c2b209c01f15cfa79c6e7	IncFIB	000107__CP014778_00094	-	-	-	-	-	-	non-mobilizable	CP032173	0.00417861	Klebsiella pneumoniae	AD443	AN001	order	Enterobacterales	order	Enterobacterales	order	Enterobacterales	11254626; 19482926; 15781495; 20851899; 16257053
KPN3:AA404	9	208460	44.2828	60fb4580e75f9d8b640705674f12fa19	IncFIB	CP024497_00001	MOBH	NC_016980_00239	MPF_F	NC_016980_00110,NC_016980_00109,NC_018107_00235,NC_023911_00309,NC_016980_00099,NC_016980_00240,NC_018107_00101	-	-	conjugative	CP024497	0.0224927	Klebsiella pneumoniae	AA404	AI432	order	Enterobacterales	order	Enterobacterales	order	Enterobacterales	11254626; 19482926; 15781495; 20851899; 16257053
KPN30:AA045	5	82300	53.531	b104cb1883df7fbaf7c9bef1033f2b9b	IncFIB	000101__NZ_CP012345_00042	-	-	-	-	-	-	non-mobilizable	CP011654	0.0150813	Citrobacter freundii	AA045	AH630	order	Enterobacterales	order	Enterobacterales	order	Enterobacterales	11254626; 19482926; 15781495; 20851899; 16257053
KPN31:AA275	7	162597	52.4106	842dcad3803f61fd0e0675436a085efd	IncFIB	000107__CP014778_00094	MOBF,MOBF	NC_021231_00058,CP035180_00077	MPF_F	NC_019155_00032,NC_019165_00034,NC_021654_00016,NC_019389_00080,NC_022609_00081,NC_014312_00128,NC_021231_00085,NC_023332_00154,NC_014312_00118,NC_014312_00116,NC_021502_00150,NC_021502_00131	-	-	conjugative	CP025142	0.0142009	Klebsiella pneumoniae	AA275	AI076	order	Enterobacterales	order	Enterobacterales	order	Enterobacterales	11254626; 19482926; 15781495; 20851899; 16257053
KPN32:AA275	8	163615	52.508	4a04defb95684b073e093c9c264f720e	IncFIB	000107__CP014778_00094	MOBF,MOBF	NC_021231_00058,CP035180_00077	MPF_F	NC_019155_00032,NC_019165_00034,NC_021654_00016,NC_019389_00080,NC_022609_00081,NC_014312_00128,NC_021231_00085,NC_023332_00154,NC_014312_00118,NC_014312_00116,NC_021502_00150,NC_021502_00131	-	-	conjugative	CP025142	0.0139486	Klebsiella pneumoniae	AA275	AI076	order	Enterobacterales	order	Enterobacterales	order	Enterobacterales	11254626; 19482926; 15781495; 20851899; 16257053
KPN33:AA275	8	164132	52.5376	3e5b5b45791b0d810b7e5056454ec4dd	IncFIB	000107__CP014778_00094	MOBF,MOBF	CP035180_00077,NC_021231_00058	MPF_F	NC_014312_00116,NC_014312_00118,NC_023332_00154,NC_021231_00085,NC_014312_00128,NC_022609_00081,NC_019389_00080,NC_021654_00016,NC_019165_00034,NC_019155_00032,NC_021502_00131,NC_021502_00150	-	-	conjugative	CP025142	0.0138985	Klebsiella pneumoniae	AA275	AI076	order	Enterobacterales	order	Enterobacterales	order	Enterobacterales	11254626; 19482926; 15781495; 20851899; 16257053
KPN34:AA275	8	164018	52.5302	099261c918d35f013c89c8734e47bb4c	IncFIB	000107__CP014778_00094	MOBF,MOBF	CP035180_00077,NC_021231_00058	MPF_F	NC_014312_00116,NC_014312_00118,NC_023332_00154,NC_021231_00085,NC_014312_00128,NC_022609_00081,NC_019389_00080,NC_021654_00016,NC_019165_00034,NC_019155_00032,NC_021502_00131,NC_021502_00150	-	-	conjugative	CP025142	0.0138985	Klebsiella pneumoniae	AA275	AI076	order	Enterobacterales	order	Enterobacterales	order	Enterobacterales	11254626; 19482926; 15781495; 20851899; 16257053
KPN36:novel_e670d517682d9d462deee45cb4ff5a3c	7	77754	50.1543	e670d517682d9d462deee45cb4ff5a3c	IncFIB	000107__CP014778_00094	MOBH	CP023978_00085	-	-	-	-	mobilizable	CP029739	0.0615839	Klebsiella pneumoniae	novel_e670d517682d9d462deee45cb4ff5a3c	-	order	Enterobacterales	order	Enterobacterales	order	Enterobacterales	11254626; 19482926; 15781495; 20851899; 16257053
KPN41:AA275	18	166773	53.366	fd40294c43ea95e79e37a6e6b8b0f8de	IncFIB	000107__CP014778_00094	MOBF,MOBF	CP035180_00077,NC_021231_00058	MPF_T	NC_021502_00150	-	-	conjugative	CP036443	0.00796745	Klebsiella pneumoniae	AA275	AI076	order	Enterobacterales	order	Enterobacterales	order	Enterobacterales	11254626; 19482926; 15781495; 20851899; 16257053
KPN42:AC125	3	112609	49.2643	3884548be4052357643607a976d9653f	IncFIB	000100__NZ_CP016161_00012	-	-	-	-	-	-	non-mobilizable	NC_016838	0.00785531	Klebsiella pneumoniae subsp. pneumoniae HS11286	AC125	AL182	order	Enterobacterales	order	Enterobacterales	order	Enterobacterales	11254626; 19482926; 15781495; 20851899; 16257053
KPN42:novel_5fe3d4207ba4de0636f604010e2c1457	3	34447	53.3312	5fe3d4207ba4de0636f604010e2c1457	IncFIB	000107__CP014778_00094	-	-	-	-	-	-	non-mobilizable	CP015026	0.0618432	Klebsiella pneumoniae	novel_5fe3d4207ba4de0636f604010e2c1457	-	order	Enterobacterales	order	Enterobacterales	order	Enterobacterales	11254626; 19482926; 15781495; 20851899; 16257053
KPN43:AA402	11	105293	51.7546	c2a3231d5082c4ca44ac93f6aea6d026	IncFIB	000107__CP014778_00094	-	-	-	-	-	-	non-mobilizable	CP021697	0.0340249	Klebsiella pneumoniae	AA402	-	order	Enterobacterales	order	Enterobacterales	order	Enterobacterales	11254626; 19482926; 15781495; 20851899; 16257053
KPN43:AC125	3	112610	49.2851	9cc37d027e1e5de328ba4965ed738c40	IncFIB	000100__NZ_CP016161_00012	-	-	-	-	-	-	non-mobilizable	NC_016838	0.00785531	Klebsiella pneumoniae subsp. pneumoniae HS11286	AC125	AL182	order	Enterobacterales	order	Enterobacterales	order	Enterobacterales	11254626; 19482926; 15781495; 20851899; 16257053
KPN44:AA275	16	168400	53.7251	285c757ced91d396defc21452195b567	IncFIB	000107__CP014778_00094	-	-	-	-	-	-	non-mobilizable	CP023442	0.00621379	Klebsiella pneumoniae	AA275	AI074	order	Enterobacterales	order	Enterobacterales	order	Enterobacterales	11254626; 19482926; 15781495; 20851899; 16257053
KPN45:AA276	2	58064	52.406	a5983c28749331b5a53e823ee5649140	IncFIB	000107__CP014778_00094	MOBF,MOBF	CP035180_00077,NC_021231_00058	MPF_F	NC_014312_00116,NC_021502_00150	-	-	conjugative	CP021166	0.0565317	Klebsiella pneumoniae	AA276	-	order	Enterobacterales	order	Enterobacterales	order	Enterobacterales	11254626; 19482926; 15781495; 20851899; 16257053
KPN46:AA277	1	175418	53.1667	ac1399bc37d5be113d67b42c349a944a	IncFIB	000107__CP014778_00094	MOBF,MOBF	CP035180_00077,NC_021231_00058	MPF_T	NC_021502_00150	-	-	conjugative	CP027425	0.0119383	Klebsiella oxytoca	AA277	AI090	order	Enterobacterales	order	Enterobacterales	order	Enterobacterales	11254626; 19482926; 15781495; 20851899; 16257053
KPN49:AA398	5	116127	49.1031	b9900e7d46d6f2d8873960c3523d84d9	IncFIB	000107__CP014778_00094	MOBH	NC_016980_00239	-	-	-	-	mobilizable	FO834905	0.000956583	Klebsiella pneumoniae	AA398	AI421	order	Enterobacterales	order	Enterobacterales	order	Enterobacterales	11254626; 19482926; 15781495; 20851899; 16257053
KPN50:AD443	13	137270	51.5225	0421faffe141f78c90129b1859eb73ec	IncFIB	000107__CP014778_00094	-	-	-	-	-	-	non-mobilizable	CP032173	0.00492718	Klebsiella pneumoniae	AD443	AN001	order	Enterobacterales	order	Enterobacterales	order	Enterobacterales	11254626; 19482926; 15781495; 20851899; 16257053
KPN51:AA276	9	144350	52.4981	2c0271bd40dca12db9c2f2cb5175aba5	IncFIB	000107__CP014778_00094	MOBF,MOBF	CP035180_00077,NC_021231_00058	MPF_F	NC_014312_00116,NC_014312_00118,NC_023332_00154,NC_019389_00068,NC_014312_00128,NC_022609_00081,NC_011281_00082,NC_021654_00016,NC_019165_00034,NC_019155_00032,NC_021502_00131,NC_021502_00150	-	-	conjugative	CP021166	0.0274249	Klebsiella pneumoniae	AA276	-	order	Enterobacterales	order	Enterobacterales	order	Enterobacterales	11254626; 19482926; 15781495; 20851899; 16257053
KPN52:novel_a576f7ae4b95327b18160f1b4da6d320	7	79572	50.1583	a576f7ae4b95327b18160f1b4da6d320	IncFIB	000107__CP014778_00094	MOBH	CP023978_00085	-	-	-	-	mobilizable	CP029739	0.0605648	Klebsiella pneumoniae	novel_a576f7ae4b95327b18160f1b4da6d320	-	order	Enterobacterales	order	Enterobacterales	order	Enterobacterales	11254626; 19482926; 15781495; 20851899; 16257053
KPN69:AA337	2	34875	51.2401	a1c9bd296184f76798827393ecbe67fd	IncFIB	000096__NC_019117_00097	-	-	-	-	-	-	non-mobilizable	CP041523	0.0376857	Escherichia coli	AA337	-	order	Enterobacterales	order	Enterobacterales	order	Enterobacterales	11254626; 19482926; 15781495; 20851899; 16257053
KPN70:AA337	2	34868	51.2476	64c3c80ce21be043f82601c92c525f22	IncFIB	000096__NC_019117_00097	-	-	-	-	-	-	non-mobilizable	CP041523	0.0376857	Escherichia coli	AA337	-	order	Enterobacterales	order	Enterobacterales	order	Enterobacterales	11254626; 19482926; 15781495; 20851899; 16257053
KPN73:AA816	15	147436	49.2607	11d1709cb0f948c6df19dcef60a42db5	IncFIB	000107__CP014778_00094	-	-	-	-	-	-	non-mobilizable	CP033758	0.0113974	Klebsiella pneumoniae	AA816	AJ187	order	Enterobacterales	order	Enterobacterales	order	Enterobacterales	11254626; 19482926; 15781495; 20851899; 16257053
KPN80:AA275	13	102910	53.1562	67698377dc7aab3be38a7f7049c7d4d2	IncFIB	000107__CP014778_00094	-	-	-	-	-	-	non-mobilizable	CP021856	0.0237537	Klebsiella pneumoniae	AA275	AI074	order	Enterobacterales	order	Enterobacterales	order	Enterobacterales	11254626; 19482926; 15781495; 20851899; 16257053
KPN83:AA275	25	180752	51.6824	50a28a6b34742462353edbbd4a1cf188	IncFIB	000107__CP014778_00094	MOBF,MOBF	NC_021231_00058,CP035180_00077	MPF_F	NC_022609_00095,NC_019165_00034,NC_021654_00016,NC_019389_00080,NC_022609_00081,NC_014312_00128,NC_019389_00068,NC_023332_00154,NC_014312_00118,NC_014312_00116,NC_021502_00150,NC_021502_00131	-	-	conjugative	CP028784	0.0227838	Klebsiella pneumoniae	AA275	AI074	order	Enterobacterales	order	Enterobacterales	order	Enterobacterales	11254626; 19482926; 15781495; 20851899; 16257053
KPN84:AA277	9	115272	52.2469	27e40915240f0fffe6e33857f547d776	IncFIB	000107__CP014778_00094	MOBF,MOBF	NC_021231_00058,CP035180_00077	MPF_F	NC_021502_00150,NC_021654_00016,NC_019389_00080,NC_022609_00081,NC_014312_00128,NC_021502_00131,NC_014312_00116,NC_014312_00118,NC_023332_00154,NC_019389_00068	-	-	conjugative	LR134219	0.0199514	Klebsiella aerogenes	AA277	AI090	order	Enterobacterales	order	Enterobacterales	order	Enterobacterales	11254626; 19482926; 15781495; 20851899; 16257053
KPN85:AC125	2	110256	48.8499	e69fadb3300e21e1b32897cc8d7b4ce5	IncFIB	000100__NZ_CP016161_00012	-	-	-	-	-	-	non-mobilizable	CP016924	0.0081558	Klebsiella pneumoniae	AC125	AL188	order	Enterobacterales	order	Enterobacterales	order	Enterobacterales	11254626; 19482926; 15781495; 20851899; 16257053
KPN85:novel_24c61cfab705c1bbb61feea9dbc05e09	2	16242	48.51	24c61cfab705c1bbb61feea9dbc05e09	IncFIB	000107__CP014778_00094	-	-	-	-	-	-	non-mobilizable	CP013713	0.0816138	Klebsiella pneumoniae	novel_24c61cfab705c1bbb61feea9dbc05e09	-	order	Enterobacterales	order	Enterobacterales	order	Enterobacterales	11254626; 19482926; 15781495; 20851899; 16257053
KPN87:AA816	6	48655	51.2794	50ef7728cf3128cec0152776d213afe9	IncFIB	000107__CP014778_00094	-	-	-	-	-	-	non-mobilizable	CP031799	0.0323015	Klebsiella pneumoniae	AA816	-	order	Enterobacterales	order	Enterobacterales	order	Enterobacterales	11254626; 19482926; 15781495; 20851899; 16257053
KPN099:AA277	15	230751	52.4375	1549e686e9cdb02d83bb389c8b6012dc	IncFIB,IncFII	000107__CP014778_00094,000124__KP125893_00142	MOBF,MOBF	CP035180_00077,NC_021231_00058	MPF_F	NC_014312_00116,NC_014312_00118,NC_023332_00154,NC_019389_00068,NC_014312_00128,NC_022609_00081,NC_011281_00082,NC_021654_00016,NC_019165_00034,NC_019155_00032,NC_021502_00131,NC_021502_00150	-	-	conjugative	CP024500	0.00157453	Klebsiella pneumoniae	AA277	AI089	order	Enterobacterales	order	Enterobacterales	order	Enterobacterales	11254626; 19482926; 15781495; 20851899; 16257053
KPN119:AA277	48	217493	52.4086	eaf23280847a9ec42ba17894dd70a57a	IncFIB,IncFII	000107__CP014778_00094,000124__KP125893_00142	MOBF,MOBF	MF156708_00148,CP035180_00077	MPF_F	NC_011281_00082,NC_022609_00081,NC_014312_00128,NC_021231_00085,NC_021502_00150,NC_019389_00068,NC_021502_00150,NC_019165_00034,NC_023332_00154,NC_014312_00116,NC_022609_00068	-	-	conjugative	CP030071	0.0132573	Klebsiella pneumoniae	AA277	AI090	order	Enterobacterales	order	Enterobacterales	order	Enterobacterales	11254626; 19482926; 15781495; 20851899; 16257053
KPN120:AA277	27	162941	52.6479	50bf632251dfa55a1f1fe99690da5f42	IncFIB,IncFII	000107__CP014778_00094,000124__KP125893_00142	-	-	MPF_F	NC_019389_00068,08-5333_00200,NC_019165_00034,NC_023332_00154,NC_014312_00128,NC_014312_00116,NC_022609_00068	-	-	non-mobilizable	CP030071	0.0101878	Klebsiella pneumoniae	AA277	AI090	order	Enterobacterales	order	Enterobacterales	order	Enterobacterales	11254626; 19482926; 15781495; 20851899; 16257053
KPN122:AA277	9	185124	51.9457	9c8af64703cac562bd159c7b3e932385	IncFIB,IncFII	000107__CP014778_00094,000124__KP125893_00142	MOBF,MOBF	CP035180_00077,NC_021231_00058	MPF_F	NC_014312_00116,NC_014312_00118,NC_023332_00154,NC_019389_00068,NC_014312_00128,NC_022609_00081,NC_011281_00082,NC_021654_00016,NC_019165_00034,NC_019155_00032,NC_021502_00131,NC_021502_00150	-	-	conjugative	CP034282	0.00028831	Klebsiella pneumoniae	AA277	AI089	family	Enterobacteriaceae	family	Enterobacteriaceae	-	-	-
KPN126:AE437	16	208005	52.0819	3c69a2816cdb8b4198c03563991f3693	IncFIB,IncFII	000107__CP014778_00094,000126__FO834904	MOBF,MOBF	CP035180_00077,NC_021231_00058	MPF_F	NC_014312_00116,NC_014312_00118,NC_023332_00154,NC_021231_00085,NC_014312_00128,NC_022609_00081,NC_019389_00080,NC_021654_00016,NC_019165_00034,NC_019155_00032,NC_021502_00131,NC_021502_00150	-	-	conjugative	CP031790	0.0230043	Klebsiella pneumoniae	AE437	AO217	order	Enterobacterales	order	Enterobacterales	order	Enterobacterales	11254626; 19482926; 15781495; 20851899; 16257053
KPN135:AD443	10	162730	51.7286	5967d72d0ee967612ac45953f76f6b85	IncFIB,IncFII	000107__CP014778_00094,000126__FO834904	-	-	-	-	-	-	non-mobilizable	CP031939	0.000409992	Klebsiella pneumoniae	AD443	AN001	order	Enterobacterales	order	Enterobacterales	order	Enterobacterales	11254626; 19482926; 15781495; 20851899; 16257053
KPN142:AA277	14	209443	52.4295	263d1c378ee0fd947982e63edf8b4d82	IncFIB,IncFII	000107__CP014778_00094,000124__KP125893_00142	MOBF,MOBF	CP035180_00077,NC_021231_00058	MPF_F	NC_014312_00116,NC_014312_00118,NC_023332_00154,NC_019389_00068,NC_014312_00128,NC_022609_00081,NC_011281_00082,NC_021654_00016,NC_019165_00034,NC_019155_00032,NC_021502_00131,NC_021502_00150	-	-	conjugative	CP024500	0.00348975	Klebsiella pneumoniae	AA277	AI089	family	Enterobacteriaceae	family	Enterobacteriaceae	-	-	-
KPN147:AA455	6	136144	49.3389	90f11be230d84e50100b87e686fc3651	IncFIB,IncFII	000107__CP014778_00094,000127__CP009275	MOBF,MOBF	NC_021231_00058,CP035180_00077	MPF_F	NC_014312_00141,NC_019165_00034,NC_021654_00016,NC_019389_00080,NC_022609_00081,NC_014312_00128,NC_021231_00085,NC_023332_00154,NC_014312_00118,NC_014312_00116,NC_021502_00150,NC_021502_00131	-	-	conjugative	CP031793	0.00173271	Klebsiella pneumoniae	AA455	AI558	order	Enterobacterales	order	Enterobacterales	order	Enterobacterales	11254626; 19482926; 15781495; 20851899; 16257053
KPN149:AA455	4	137596	49.3619	513eb972b79225dfce26a4380a7c55b3	IncFIB,IncFII	000107__CP014778_00094,000127__CP009275	MOBF,MOBF	CP035180_00077,NC_021231_00058	MPF_F	NC_014312_00116,NC_014312_00118,NC_023332_00154,NC_021231_00085,NC_014312_00128,NC_022609_00081,NC_019389_00080,NC_021654_00016,NC_019165_00034,NC_014312_00141,NC_021502_00131,NC_021502_00150	-	-	conjugative	CP031793	0.00160079	Klebsiella pneumoniae	AA455	AI558	order	Enterobacterales	order	Enterobacterales	order	Enterobacterales	11254626; 19482926; 15781495; 20851899; 16257053
KPN178:AA277	21	231236	52.5532	47d37de8fb880190d4aa5ac8dd2a7956	IncFIB,IncFII	000107__CP014778_00094,000124__KP125893_00142	MOBF,MOBF	NC_021231_00058,CP035180_00077	MPF_F	NC_019155_00032,NC_019165_00034,NC_021654_00016,NC_011281_00082,NC_022609_00081,NC_014312_00128,NC_019389_00068,NC_023332_00154,NC_014312_00118,NC_014312_00116,NC_021502_00150,NC_021502_00131	-	-	conjugative	CP024500	0.00146992	Klebsiella pneumoniae	AA277	AI089	order	Enterobacterales	order	Enterobacterales	order	Enterobacterales	11254626; 19482926; 15781495; 20851899; 16257053
KPN23:AA454	14	172072	49.989	4612a57399ea923c37d7dea4c3157cf8	IncFIB,IncFII	000107__CP014778_00094,MK649828_00114	MOBF,MOBF	NC_021231_00058,CP035180_00077	MPF_F	NC_019155_00032,NC_019165_00034,NC_021654_00016,NC_019389_00080,NC_022609_00081,NC_014312_00128,NC_019389_00068,NC_023332_00154,NC_014312_00118,NC_014312_00116,NC_021502_00150,NC_021502_00131	-	-	conjugative	CP041094	0.00331442	Klebsiella pneumoniae subsp. pneumoniae	AA454	AI557	order	Enterobacterales	order	Enterobacterales	order	Enterobacterales	11254626; 19482926; 15781495; 20851899; 16257053
KPN164:AE437	14	280564	51.6043	f1782409091f4c9595cfc8cf21f8db72	IncFIB,IncFII,IncHI1B	000107__CP014778_00094,000126__FO834904,JN420336	MOBF,MOBF	CP035180_00077,NC_021231_00058	MPF_F	NC_014312_00116,NC_014312_00118,NC_023332_00154,NC_021231_00085,NC_014312_00128,NC_022609_00081,NC_019389_00080,NC_021654_00016,NC_019165_00034,NC_019155_00032,NC_021502_00131,NC_021502_00150	-	-	conjugative	CP031790	0.0217093	Klebsiella pneumoniae	AE437	AO217	order	Enterobacterales	order	Enterobacterales	order	Enterobacterales	18606786; 11254626; 19482926; 15781495; 20851899; 16257053
KPN22:AA448	18	125794	52.3133	8844874b733a36f7830a4db7dfdc8992	IncFIB,IncFII,IncR	000107__CP014778_00094,MK649828_00114,000204__CP008701_00115	MOBF,MOBF	NC_021231_00058,CP035180_00077	MPF_F	NC_014312_00141,NC_019165_00034,NC_021654_00016,NC_011281_00082,NC_022609_00081,NC_014312_00128,NC_019389_00068,NC_023332_00154,NC_014312_00118,NC_014312_00116,NC_021502_00131,NC_021502_00150	MOBF	NZ_CP013834	conjugative	MG288683	0.0412845	Klebsiella aerogenes	AA448	-	order	Enterobacterales	order	Enterobacterales	order	Enterobacterales	11254626; 19482926; 23711894; 15781495; 20851899; 16257053
KPN154:AA277	30	250840	52.3182	c18151339ce1dc331b6bf456dcfdc62a	IncFIB,IncFII,rep_cluster_1418	000107__CP014778_00094,000124__KP125893_00142,000759__NC_013950_00034	MOBF,MOBF	MF156708_00148,CP035180_00077	MPF_F	NC_019155_00032,NC_019165_00034,NC_021654_00016,NC_019389_00080,NC_022609_00081,NC_014312_00128,NC_021231_00085,NC_023332_00154,NC_014312_00118,NC_014312_00116,NC_021502_00150,NC_021502_00131	-	-	conjugative	CP041936	0.00390583	Klebsiella pneumoniae	AA277	AI086	order	Enterobacterales	order	Enterobacterales	order	Enterobacterales	11254626; 16940067; 19482926; 15781495; 20851899; 16257053
KPN100:novel_2428e3c17bc5ad9cb5b9d49e396329b8	3	13634	51.8557	2428e3c17bc5ad9cb5b9d49e396329b8	IncFIB,IncFII,rep_cluster_2183	000107__CP014778_00094,000129__CP018340,CP033468_00001	-	-	-	-	-	-	non-mobilizable	CP026180	0.0770708	Klebsiella pneumoniae	novel_2428e3c17bc5ad9cb5b9d49e396329b8	-	order	Enterobacterales	order	Enterobacterales	order	Enterobacterales	11254626; 19482926; 15781495; 20851899; 16257053
KPN104:AA275	33	188064	52.7071	aa32af160689baeb3792e2d4bcec28ab	IncFIB,IncFII,rep_cluster_2183	000107__CP014778_00094,000132__HG969996,CP017721_00179	MOBF	CP024544_00079	MPF_F	NC_019155_00032,NC_019165_00034,NC_021502_00150,NC_019389_00068,NC_021654_00004,NC_021502_00131,NC_014312_00116,NC_022609_00068,NC_022609_00081	-	-	conjugative	CP022145	0.0103986	Klebsiella pneumoniae	AA275	AI074	order	Enterobacterales	order	Enterobacterales	order	Enterobacterales	11254626; 19482926; 15781495; 20851899; 16257053
KPN107:AA275	49	236526	52.5173	a7d34e34e70d0965e4baebd617a91d85	IncFIB,IncFII,rep_cluster_2183	000107__CP014778_00094,000132__HG969996,CP017721_00179	MOBF	NC_021231_00058	MPF_F	NC_021654_00004,NC_019389_00068,NC_022609_00081,NC_014312_00128,NC_023332_00154,NC_014312_00118,NC_014312_00116,NC_022609_00081	-	-	conjugative	CP009777	0.00748619	Klebsiella pneumoniae subsp. pneumoniae	AA275	AI074	order	Enterobacterales	order	Enterobacterales	order	Enterobacterales	11254626; 19482926; 15781495; 20851899; 16257053
KPN124:AA275	21	174650	52.8102	49d21bca20202f70fbc8878007cda6f7	IncFIB,IncFII,rep_cluster_2183	000107__CP014778_00094,000132__HG969996,CP017721_00179	MOBF,MOBF	CP035180_00077,NC_021231_00058	MPF_F	NC_014312_00128,NC_022609_00081,NC_019389_00080,NC_021654_00016,NC_019165_00034,NC_019155_00032,NC_021502_00131,NC_021502_00150	-	-	conjugative	CP033774	0.00294054	Klebsiella pneumoniae	AA275	AI074	order	Enterobacterales	order	Enterobacterales	order	Enterobacterales	11254626; 19482926; 15781495; 20851899; 16257053
KPN139:AA035	38	269350	52.258	099032a694a9375f8164c739e8387841	IncFIB,IncFII,rep_cluster_2183	000107__CP014778_00094,000132__HG969996,CP017721_00179	MOBF,MOBF	CP035180_00077,NC_021231_00058	MPF_F	NC_021502_00150,NC_014312_00116,NC_021654_00016,NC_019389_00080,NC_022609_00081,NC_014312_00128,NC_021502_00131,NC_019155_00032,NC_019165_00034,NC_021231_00085,NC_023332_00154,NC_014312_00118	-	-	conjugative	CP007734	0.0264788	Klebsiella pneumoniae subsp. pneumoniae KPNIH27	AA035	-	order	Enterobacterales	order	Enterobacterales	order	Enterobacterales	11254626; 19482926; 15781495; 20851899; 16257053
KPN140:AA275	32	183864	52.2005	901422f2d6fbc9b39e0a88317d8c9430	IncFIB,IncFII,rep_cluster_2183	000107__CP014778_00094,000132__HG969996,CP017721_00179	MOBF	CP026151_00010	MPF_F	NC_021654_00004,NC_023332_00154,NC_014312_00118,NC_014312_00116,NC_019389_00068,NC_021502_00150,NC_014312_00128,NC_019165_00034,NC_021654_00016,NC_022609_00081,NC_019389_00080	-	-	conjugative	CP008930	0.00476862	Klebsiella pneumoniae	AA275	AI074	order	Enterobacterales	order	Enterobacterales	order	Enterobacterales	11254626; 19482926; 15781495; 20851899; 16257053
KPN145:AA277	5	166266	51.8482	20056e37f845f84abaf9e8a49a618127	IncFIB,IncFII,rep_cluster_2183	000107__CP014778_00094,000129__CP018340,CP017721_00179	MOBF,MOBF	CP035180_00077,NC_021231_00058	MPF_F	NC_014312_00116,NC_014312_00118,NC_023332_00154,NC_019389_00068,NC_014312_00128,NC_022609_00081,NC_011281_00082,NC_021654_00016,NC_019165_00034,NC_019155_00032,NC_021502_00131,NC_021502_00150	-	-	conjugative	CP028954	0.0290489	Klebsiella pneumoniae	AA277	AI092	order	Enterobacterales	order	Enterobacterales	order	Enterobacterales	11254626; 19482926; 15781495; 20851899; 16257053
KPN151:AA275	24	196240	52.4302	371ff90a7adc91f685d0f234157ebbc3	IncFIB,IncFII,rep_cluster_2183	000107__CP014778_00094,000132__HG969996,CP017721_00179	MOBF,MOBF	NC_021231_00058,CP035180_00077	MPF_F	NC_023905_00125,NC_019165_00034,NC_021654_00016,NC_019389_00080,NC_022609_00081,NC_021502_00150,NC_014312_00116,NC_014312_00118,NC_023332_00154,NC_021502_00131,NC_014312_00116,NC_014312_00118,NC_023332_00154,NC_019389_00068,NC_021502_00131	-	-	conjugative	JN233704	0.00956826	Klebsiella pneumoniae	AA275	AI074	order	Enterobacterales	order	Enterobacterales	order	Enterobacterales	11254626; 19482926; 15781495; 20851899; 16257053
KPN166:AA275	23	182361	52.52	b002b6d17488a60903f37064681ac0d0	IncFIB,IncFII,rep_cluster_2183	000107__CP014778_00094,000132__HG969996,CP017721_00179	MOBF,MOBF	NC_021231_00058,CP035180_00077	MPF_F	NC_023905_00125,NC_019165_00034,NC_021654_00016,NC_019389_00080,NC_022609_00081,NC_021502_00150,NC_014312_00116,NC_014312_00118,NC_023332_00154,NC_021502_00131,NC_014312_00116,NC_014312_00118,NC_023332_00154,NC_019389_00068,NC_021502_00131	-	-	conjugative	CP025038	0.00981378	Klebsiella pneumoniae	AA275	AI074	order	Enterobacterales	order	Enterobacterales	order	Enterobacterales	11254626; 19482926; 15781495; 20851899; 16257053
KPN18:AA275	44	251086	52.5963	6de9fe826b7860cedb4b36c0a33145d2	IncFIB,IncFII,rep_cluster_2183	000107__CP014778_00094,000132__HG969996,CP017721_00179	MOBF	CP034777_00116	MPF_F	NC_021654_00004,NC_014312_00128,NC_022609_00081,NC_019389_00080,NC_021654_00016,NC_021502_00131,NC_021654_00016,NC_019389_00080,NC_022609_00081,NC_014312_00128,NC_019389_00068,NC_021502_00131,NC_023905_00125,NC_021502_00150,NC_019155_00032,NC_021502_00150,NC_014312_00116,NC_014312_00118,NC_023332_00154	-	-	conjugative	CP009777	0.00676872	Klebsiella pneumoniae subsp. pneumoniae	AA275	AI074	order	Enterobacterales	order	Enterobacterales	order	Enterobacterales	11254626; 19482926; 15781495; 20851899; 16257053
KPN3:AA275	30	209236	52.7863	02cd80a1aa4bb9e3671e48dfc8a8690c	IncFIB,IncFII,rep_cluster_2183	000107__CP014778_00094,000132__HG969996,CP017721_00179	MOBF	CP024544_00079	MPF_F	NC_022609_00081,NC_019389_00080,NC_021654_00016,NC_019165_00034,NC_019155_00032,NC_021502_00150,NC_023332_00154,NC_014312_00118,NC_014312_00116,NC_021502_00131,NC_021654_00004,NC_021502_00131,NC_021502_00150,NC_022609_00081,NC_019389_00080,NC_021654_00016,NC_022609_00081,NC_019389_00080,NC_014312_00118,NC_014312_00118	-	-	conjugative	CP022145	0.0115313	Klebsiella pneumoniae	AA275	AI074	order	Enterobacterales	order	Enterobacterales	order	Enterobacterales	11254626; 19482926; 15781495; 20851899; 16257053
KPN37:AA275	21	200512	53.2367	d3d376b10f9f7bbb5c5dcf0574f31263	IncFIB,IncFII,rep_cluster_2183	000107__CP014778_00094,000132__HG969996,CP017721_00179	MOBF,MOBF	CP035180_00077,NC_021231_00058	MPF_F	NC_014312_00116,NC_014312_00118,NC_023332_00154,NC_021654_00004,NC_014312_00128,NC_022609_00081,NC_019389_00080,NC_021654_00016,NC_019165_00034,NC_019155_00032,NC_021502_00131,NC_021502_00150	-	-	conjugative	CP031583	0.00402654	Klebsiella pneumoniae	AA275	AI074	order	Enterobacterales	order	Enterobacterales	order	Enterobacterales	11254626; 19482926; 15781495; 20851899; 16257053
KPN47:AA275	20	201020	53.228	ccb37604ca3feec5d8c0cba32376d8b7	IncFIB,IncFII,rep_cluster_2183	000107__CP014778_00094,000132__HG969996,CP017721_00179	MOBF,MOBF	CP035180_00077,NC_021231_00058	MPF_F	NC_014312_00116,NC_014312_00118,NC_023332_00154,NC_021654_00004,NC_014312_00128,NC_022609_00081,NC_019389_00080,NC_021654_00016,NC_019165_00034,NC_019155_00032,NC_021502_00131,NC_021502_00150	-	-	conjugative	CP031583	0.00402654	Klebsiella pneumoniae	AA275	AI074	order	Enterobacterales	order	Enterobacterales	order	Enterobacterales	11254626; 19482926; 15781495; 20851899; 16257053
KPN53:AA457	7	195589	51.6701	872aca5ca9256c8ba5d81c5707453dac	IncFIB,IncFII,rep_cluster_2183	000107__CP014778_00094,000132__HG969996,CP017721_00179	MOBF,MOBF	CP035180_00077,NC_021231_00058	MPF_F	NC_014312_00116,NC_014312_00118,NC_023332_00154,NC_021231_00085,NC_014312_00128,NC_022609_00081,NC_019389_00080,NC_021654_00016,NC_019165_00034,NC_019155_00032,NC_021502_00131,NC_021502_00150	-	-	conjugative	CP042521	0.00869309	Klebsiella pneumoniae	AA457	AI563	order	Enterobacterales	order	Enterobacterales	order	Enterobacterales	11254626; 19482926; 15781495; 20851899; 16257053
KPN88:AA275	24	200186	52.9543	bdbf2949420d6997dbb830d424d0ae85	IncFIB,IncFII,rep_cluster_2183	000107__CP014778_00094,000132__HG969996,CP017721_00179	MOBF,MOBF	CP035180_00077,NC_021231_00058	MPF_F	NC_019155_00032,NC_021502_00150,NC_014312_00116,NC_014312_00118,NC_023332_00154,NC_021654_00004	-	-	conjugative	CP027152	0.00238081	Klebsiella pneumoniae	AA275	AI074	order	Enterobacterales	order	Enterobacterales	order	Enterobacterales	11254626; 19482926; 15781495; 20851899; 16257053
KPN094:AA275	16	206692	51.2811	367385609e4c5d455d2242f025c20081	IncFIB,IncFII,rep_cluster_2183,IncR	000107__CP014778_00094,000129__CP018340,CP033468_00001,000204__CP008701_00115	MOBF,MOBF	NC_021231_00058,CP035180_00077	MPF_F	NC_014312_00141,NC_019165_00034,NC_021654_00016,NC_019389_00080,NC_022609_00081,NC_014312_00128,NC_019389_00068,NC_023332_00154,NC_014312_00118,NC_014312_00116,NC_021502_00150,NC_021502_00131	-	-	conjugative	CP022125	0.00340187	Klebsiella pneumoniae	AA275	AI078	order	Enterobacterales	order	Enterobacterales	order	Enterobacterales	11254626; 19482926; 23711894; 15781495; 20851899; 16257053
KPN96:AA045	19	175155	54.3233	17a19e1994c4ab394d421cbcc9cf3782	IncFIB,IncFII,rep_cluster_2272	000101__NZ_CP012345_00042,AJ851089,CP042519_00001	MOBF	NC_021501_00073	MPF_F	NC_021501_00076,NC_006323_00113,NC_021501_00083,NC_021501_00084,NC_021501_00085,NC_006323_00105,NC_006323_00097,NC_006323_00096,NC_021501_00097,NC_021501_00074,NC_009378_00101	-	-	conjugative	CP035277	0.00414809	Citrobacter freundii	AA045	AH629	order	Enterobacterales	order	Enterobacterales	-	-	-
KPN86:AA276	18	253538	51.808	0054df2f4cf2acda3b12f5a1a9deec3b	IncFIB,IncFII,rep_cluster_2392	000107__CP014778_00094,CP000966,CP045830_00002	MOBF,MOBF	CP035180_00077,NC_021231_00058	MPF_F	NC_014312_00116,NC_014312_00118,NC_023332_00154,NC_019389_00068,NC_014312_00128,NC_022609_00081,NC_011281_00082,NC_021654_00016,NC_019165_00034,NC_019155_00032,NC_021502_00131,NC_021502_00150	-	-	conjugative	MG764551	0.00157453	Klebsiella pneumoniae	AA276	AI081	multi-phylla	Actinobacteria,Proteobacteria	multi-phylla	Actinobacteria,Proteobacteria	order	Enterobacterales	11254626; 19482926; 15781495; 20851899; 16257053
KPN106:AA405	24	310011	46.8987	0ba5fdba534d315728f4b0a11c8688f1	IncFIB,IncHI1B	CP024497_00001,JN420336	MOBH	NC_016980_00239	MPF_F	NC_016980_00240,NC_018107_00101,NC_018107_00235,NC_023911_00309,NC_016980_00099,NC_016980_00109,NC_016980_00110	-	-	conjugative	CP032208	0.00993767	Klebsiella pneumoniae	AA405	AI444	order	Enterobacterales	order	Enterobacterales	order	Enterobacterales	18606786; 11254626; 19482926; 15781495; 20851899; 16257053
KPN115:AA406	12	220944	49.9502	a8399e21a7cf3c8ea16ee795dbb29eb2	IncFIB,IncHI1B	000107__CP014778_00094,JN420336	-	-	-	-	-	-	non-mobilizable	CP034083	0.00105797	Klebsiella pneumoniae subsp. pneumoniae	AA406	AI454	genus	Klebsiella	genus	Klebsiella	-	-	-
KPN40:AA405	9	154570	44.3171	096d7ed617ab11ee452e953a100f7fe0	IncFIB,IncHI1B	CP024497_00001,JN420336	-	-	MPF_F	NC_016980_00110,NC_016980_00109,NC_018107_00235,NC_023911_00309,NC_016980_00099	-	-	non-mobilizable	HG918041	0.0266484	Klebsiella pneumoniae	AA405	-	order	Enterobacterales	order	Enterobacterales	order	Enterobacterales	18606786; 11254626; 19482926; 15781495; 20851899; 16257053
KPN45:AA405	3	236626	45.5812	35aab38a842d847ff2b13d4d6b634d90	IncFIB,IncHI1B	CP024497_00001,JN420336	MOBH	NC_016980_00239	MPF_F	NC_023911_00309,NC_018107_00235,NC_016980_00109,NC_016980_00110,NC_018107_00101,NC_016980_00240,NC_016980_00099	-	-	conjugative	CP032223	0.0126819	Klebsiella pneumoniae	AA405	AI445	family	Enterobacteriaceae	family	Enterobacteriaceae	-	-	-
KPN8:AA406	14	224002	49.9585	8a2fe4eb47828a14da238438c2b49b64	IncFIB,IncHI1B	000107__CP014778_00094,JN420336	-	-	-	-	-	-	non-mobilizable	CP014011	0.000557238	Klebsiella pneumoniae subsp. pneumoniae	AA406	AI454	order	Enterobacterales	order	Enterobacterales	order	Enterobacterales	18606786; 11254626; 19482926; 15781495; 20851899; 16257053
KPN89:AA406	10	224752	49.9368	98fbf76878d65027f7b00643e84a92c0	IncFIB,IncHI1B	000107__CP014778_00094,JN420336	-	-	-	-	-	-	non-mobilizable	CP014011	0.000532603	Klebsiella pneumoniae subsp. pneumoniae	AA406	AI454	genus	Klebsiella	genus	Klebsiella	-	-	-
KPN132:AA405	25	298464	46.9283	0f49b3dfe9dcf4d3b1816a6e3da9fd5c	IncFIB,IncHI1B,IncR,rep_cluster_1254	CP024497_00001,JN420336,000204__CP008701_00115,000562__KT346360_00001	MOBH	NC_016980_00239	MPF_F	NC_023911_00309,NC_018107_00235,NC_016980_00099,NC_018107_00101,NC_016980_00240,NC_016980_00109,NC_016980_00110	MOBF	NZ_CP016035	conjugative	CP020068	0.00343111	Klebsiella pneumoniae	AA405	AI439	class	Gammaproteobacteria	class	Gammaproteobacteria	order	Enterobacterales	18606786; 11254626; 19482926; 23711894; 15781495; 20851899; 16257053
KPN123:AA035	13	161026	51.7066	d2f18ab2651acf80ae58b3ae0498ffcd	IncFIB,IncN	000107__CP014778_00094,000155__CP018649	MOBF	NC_015599_00019	MPF_T	NC_022375_00024	MOBF	NZ_CP012928	conjugative	CP026175	0.0239829	Klebsiella pneumoniae	AA035	AH600	class	Gammaproteobacteria	class	Gammaproteobacteria	order	Enterobacterales	11254626; 19482926; 23114770; 28842132; 15781495; 20851899; 16257053
KPN170:AA457	14	198319	52.4251	c1413d245ad9ba4cfcf259aa2baea35c	IncFIB,IncQ1	000107__CP014778_00094,000195__NC_013728_00014	MOBF,MOBF	CP035180_00077,NC_021231_00058	MPF_F	NC_019155_00032,NC_019165_00034,NC_021654_00016,NC_019389_00080,NC_022609_00081,NC_014312_00128,NC_019389_00068,NC_023332_00154,NC_014312_00118,NC_014312_00116,NC_021502_00131,NC_021502_00150	-	-	conjugative	CP042521	0.0258115	Klebsiella pneumoniae	AA457	-	phylum	Proteobacteria	phylum	Proteobacteria	phylum	Proteobacteria	11254626; 25389419; 2653965; 19482926; 15781495; 20851899; 16257053
KPN121:AA275	11	171890	52.2032	4444354680bd999971ed4cd22f993299	IncFIB,IncR	000107__CP014778_00094,000204__CP008701_00115	MOBF,MOBF	CP035180_00077,NC_021231_00058	MPF_F	NC_019155_00032,NC_019165_00034,NC_021654_00016,NC_011281_00082,NC_022609_00081,NC_014312_00128,NC_019389_00068,NC_023332_00154,NC_014312_00118,NC_014312_00116,NC_021502_00131,NC_021502_00150	-	-	conjugative	CP025142	0.0102298	Klebsiella pneumoniae	AA275	AI076	order	Enterobacterales	order	Enterobacterales	order	Enterobacterales	11254626; 19482926; 23711894; 15781495; 20851899; 16257053
KPN161:novel_9c668c6499f26da03c80addc1682ba2c	7	78544	55.0316	9c668c6499f26da03c80addc1682ba2c	IncFIB,IncR	000107__CP014778_00094,000204__CP008701_00115	-	-	-	-	-	-	non-mobilizable	CP011623	0.0621044	Klebsiella pneumoniae	novel_9c668c6499f26da03c80addc1682ba2c	-	order	Enterobacterales	order	Enterobacterales	order	Enterobacterales	11254626; 19482926; 23711894; 15781495; 20851899; 16257053
KPN24:AA833	14	110570	50.7488	73d62641a74f0e7a7d294fad2995843a	IncFIB,IncR	000107__CP014778_00094,000204__CP008701_00115	-	-	-	-	-	-	non-mobilizable	CP035197	0.0533217	Klebsiella pneumoniae	AA833	-	order	Enterobacterales	order	Enterobacterales	order	Enterobacterales	11254626; 19482926; 23711894; 15781495; 20851899; 16257053
KPN71:AA402	17	187132	50.9907	3f70ef27600e15a9596067539a654836	IncFIB,IncU	000107__CP014778_00094,000212__CP012556_00176	-	-	-	-	-	-	non-mobilizable	CP029739	0.00698112	Klebsiella pneumoniae	AA402	AI429	genus	Klebsiella	genus	Klebsiella	-	-	-
KPN74:AA402	17	186405	50.9927	1243160662376446043a3911d5e3675a	IncFIB,IncU	000107__CP014778_00094,000212__CP012556_00176	-	-	-	-	-	-	non-mobilizable	CP029739	0.00708822	Klebsiella pneumoniae	AA402	AI429	genus	Klebsiella	genus	Klebsiella	-	-	-
KPN100:AD306	1	31707	48.2638	88725c7efa4fb6ecfda3436912714306	IncFII	000117__EU383016_00001	-	-	MPF_T	NC_013284_00016,NC_010726_00014,NC_005814_00013,NC_010726_00011	-	-	non-mobilizable	CP018922	0.0366967	Serratia marcescens	AD306	-	order	Enterobacterales	order	Enterobacterales	family	Enterobacteriaceae	20851899
KPN123:AD306	1	25266	46.9564	9aa29f8b252c3fda23ecfd1058ee48c8	IncFII	000116__CP022119_00033	-	-	MPF_T	NC_013284_00016,NC_010726_00011,NC_005814_00013,NC_010726_00014	-	-	non-mobilizable	CP018922	0.0278663	Serratia marcescens	AD306	-	order	Enterobacterales	order	Enterobacterales	family	Enterobacteriaceae	20851899
KPN128:AA450	4	31094	51.2768	14571cf1b8080208bdcf7cf4cee1b607	IncFII	000124__KP125893_00142	MOBF,MOBF	CP035180_00077,NC_021231_00058	MPF_F	NC_019165_00034,NC_019155_00032,NC_021502_00150	-	-	conjugative	CP020843	0.0465005	Klebsiella pneumoniae	AA450	-	order	Enterobacterales	order	Enterobacterales	family	Enterobacteriaceae	20851899
KPN133:AA033	4	100364	53.8679	03570b454889bec4dc5028a3ba1f7ed0	IncFII	000127__CP009275	MOBF	CP026276_00127	MPF_F	NC_019155_00032,NC_019165_00034,NC_022609_00081,NC_014312_00128,NC_021654_00004,NC_023332_00154,NC_014312_00118,NC_014312_00116,NC_021502_00150,NC_021502_00131	-	-	conjugative	CP024490	0.0511448	Klebsiella pneumoniae	AA033	-	order	Enterobacterales	order	Enterobacterales	family	Enterobacteriaceae	20851899
KPN140:AA583	3	20340	55.1426	e1d3d1f05f70fd3bf1e4f26889cff5e6	IncFII	000124__KP125893_00142	-	-	-	-	-	-	non-mobilizable	CP021135	0.0485634	Pseudomonas fragi	AA583	-	class	Gammaproteobacteria	class	Gammaproteobacteria	family	Enterobacteriaceae	20851899
KPN141:AA966	1	63826	51.2158	0d27b71a5d0937a9fd62706f255f6069	IncFII	000115__CP020905_00046	MOBP	NC_021198_00256	MPF_I	NC_021198_00234,NC_021198_00235,NC_021198_00236,NC_021198_00238,NC_021198_00239,NC_021198_00240,NC_021198_00243,NC_021198_00249,NC_021198_00230	-	-	conjugative	CP035205	0.0172424	Klebsiella pneumoniae	AA966	AJ461	order	Enterobacterales	order	Enterobacterales	family	Enterobacteriaceae	20851899
KPN143:AA450	4	62736	51.9399	1ae7dfb3bfacff0fcf5f1cb5e3f3d721	IncFII	000126__FO834904	MOBF,MOBF	CP035180_00077,NC_021231_00058	MPF_F	NC_014312_00116,NC_014312_00118,NC_023332_00154,NC_021231_00085,NC_014312_00128,NC_022609_00081,NC_019389_00080,NC_021654_00016,NC_019165_00034,NC_019155_00032,NC_021502_00131,NC_021502_00150	-	-	conjugative	CP044529	0.0433296	Klebsiella grimontii	AA450	-	order	Enterobacterales	order	Enterobacterales	family	Enterobacteriaceae	20851899
KPN148:AE105	2	75153	52.7111	03a3a08497d3ad2a7ab77e61022a001d	IncFII	000129__CP018340	MOBF	CP008789_00079	MPF_F	NC_014312_00116,NC_014312_00118,NC_023332_00154,NC_014312_00128,NC_022609_00081,NC_019165_00034,NC_021502_00131,NC_021502_00150	-	-	conjugative	CP024509	0.0461689	Klebsiella pneumoniae	AE105	-	order	Enterobacterales	order	Enterobacterales	family	Enterobacteriaceae	20851899
KPN156:AA447	3	113461	51.8742	2f363eca0122b2a6a25331f37a0157a7	IncFII	000126__FO834904	MOBF,MOBF	NC_021231_00058,CP035180_00077	MPF_F	NC_019155_00032,NC_019165_00034,NC_021654_00016,NC_019389_00080,NC_022609_00081,NC_014312_00128,NC_021231_00085,NC_023332_00154,NC_014312_00118,NC_014312_00116,NC_021502_00150,NC_021502_00131	-	-	conjugative	CP031801	0.0314775	Klebsiella pneumoniae	AA447	-	order	Enterobacterales	order	Enterobacterales	family	Enterobacteriaceae	20851899
KPN165:AA448	5	86689	50.8807	7a3ee0f0d01d4a76b094f008095a098d	IncFII	MK649828_00114	MOBF,MOBF	NC_021231_00058,CP035180_00077	MPF_F	NC_019155_00032,NC_019165_00034,NC_021654_00016,NC_011281_00082,NC_022609_00081,NC_014312_00128,NC_019389_00068,NC_023332_00154,NC_014312_00118,NC_014312_00116,NC_021502_00150,NC_021502_00131	-	-	conjugative	MG288683	0.0494626	Klebsiella aerogenes	AA448	-	order	Enterobacterales	order	Enterobacterales	family	Enterobacteriaceae	20851899
KPN177:AE437	7	144298	52.5052	4b8411a2e3d405457053f5e6e3562578	IncFII	000126__FO834904	MOBF,MOBF	CP035180_00077,NC_021231_00058	MPF_F	NC_014312_00116,NC_014312_00118,NC_023332_00154,NC_019389_00068,NC_014312_00128,NC_022609_00081,NC_019389_00080,NC_021654_00016,NC_019165_00034,NC_019155_00032,NC_021502_00131,NC_021502_00150	-	-	conjugative	CP016160	0.0194991	Klebsiella pneumoniae	AE437	AO215	order	Enterobacterales	order	Enterobacterales	family	Enterobacteriaceae	20851899
KPN22:novel_965a2ee4ef27b7c0c6432125c5c05389	1	55357	52.6564	965a2ee4ef27b7c0c6432125c5c05389	IncFII	000118__KJ958926_00047	MOBP	NC_021198_00256	MPF_I	NC_021198_00249,NC_021198_00243,NC_021198_00240,NC_021198_00239,NC_021198_00238,NC_021198_00236,NC_021198_00235,NC_021198_00234,NC_021198_00230	-	-	conjugative	CP035205	0.0651085	Klebsiella pneumoniae	novel_965a2ee4ef27b7c0c6432125c5c05389	-	order	Enterobacterales	order	Enterobacterales	family	Enterobacteriaceae	20851899
KPN3:AA434	4	25449	53.1219	89f767f1515c73afaf69f7782f2fa30a	IncFII	000129__CP018340	-	-	-	-	-	-	non-mobilizable	CP025040	0.0334751	Klebsiella pneumoniae	AA434	-	order	Enterobacterales	order	Enterobacterales	family	Enterobacteriaceae	20851899
KPN36:AA821	7	132735	52.974	ae7dedf69266e62a22d40f97c753b92c	IncFII	000126__FO834904	MOBF,MOBF	NC_021231_00058,CP035180_00077	MPF_F	NC_014312_00141,NC_019165_00034,NC_021654_00016,NC_019389_00080,NC_022609_00081,NC_014312_00128,NC_021231_00085,NC_023332_00154,NC_014312_00118,NC_014312_00116,NC_021502_00150,NC_021502_00131	-	-	conjugative	CP025516	0.0303826	Klebsiella pneumoniae	AA821	-	order	Enterobacterales	order	Enterobacterales	family	Enterobacteriaceae	20851899
KPN42:AA022	5	110465	52.0708	1210725bc257eb13044b0346a0db3f59	IncFII	000124__KP125893_00142	MOBF,MOBF	NC_021231_00058,CP035180_00077	MPF_F	NC_022609_00095,NC_019165_00034,NC_021654_00016,NC_011281_00082,NC_022609_00081,NC_014312_00128,NC_021231_00085,NC_023332_00154,NC_014312_00118,NC_014312_00116,NC_021502_00150,NC_021502_00131	-	-	conjugative	CP026212	0.0298031	Citrobacter sp. CFNIH10	AA022	-	order	Enterobacterales	order	Enterobacterales	family	Enterobacteriaceae	20851899
KPN85:AA966	5	80895	54.0281	7d88e6d31ae4caa8e7b9e7d61e93e303	IncFII	000119__MF133496_00001	MOBP	NC_021198_00256	MPF_I	NC_021198_00230,NC_021198_00234,NC_021198_00235,NC_021198_00236,NC_021198_00238,NC_021198_00239,NC_021198_00240,NC_021198_00243,NC_021198_00249	-	-	conjugative	CP029382	0.00128842	Klebsiella pneumoniae subsp. pneumoniae	AA966	AJ461	order	Enterobacterales	order	Enterobacterales	family	Enterobacteriaceae	20851899
KPN52:AA274	7	163448	53.1196	55e176b81c0b67c980442142747c4e0a	IncFII,IncR	000126__FO834904,000204__CP008701_00115	MOBF,MOBF	NC_021231_00058,CP035180_00077	MPF_F	NC_014312_00141,NC_019165_00034,NC_021654_00016,NC_019389_00080,NC_022609_00081,NC_014312_00128,NC_021231_00085,NC_023332_00154,NC_014312_00118,NC_014312_00116,NC_021502_00150,NC_021502_00131	-	-	conjugative	CP011977	0.0391011	Klebsiella pneumoniae DMC1097	AA274	-	genus	Klebsiella	genus	Klebsiella	-	-	-
KPN152:AA964	2	72602	53.0619	54b3d74db1fd85dad01c661640705656	IncFII,rep_cluster_1418	000118__KJ958926_00047,000759__NC_013950_00034	MOBP	NC_021198_00256	MPF_I	NC_021198_00230,NC_021198_00234,NC_021198_00235,NC_021198_00236,NC_021198_00238,NC_021198_00239,NC_021198_00240,NC_021198_00243,NC_021198_00249	-	-	conjugative	CP018674	0.00916565	Klebsiella pneumoniae	AA964	AJ455	order	Enterobacterales	order	Enterobacterales	family	Enterobacteriaceae	16940067; 20851899
KPN35:AA434	11	121988	53.8168	884419a8d87005087aa0c89aba887a2a	IncFII,rep_cluster_1418	000129__CP018340,000759__NC_013950_00034	MOBF	CP024544_00079	MPF_F	NC_014312_00116,NC_014312_00118,NC_023332_00154,NC_014312_00128,NC_022609_00081,NC_019389_00080,NC_021654_00016,NC_019165_00034,NC_019155_00032,NC_021502_00131,NC_021502_00150	-	-	conjugative	CP021753	0.00655869	Klebsiella pneumoniae	AA434	AI501	order	Enterobacterales	order	Enterobacterales	family	Enterobacteriaceae	16940067; 20851899
KPN43:AA022	6	115825	51.905	11577b4707e8594def713025db4921b4	IncFII,rep_cluster_1418	000124__KP125893_00142,000759__NC_013950_00034	MOBF,MOBF	NC_021231_00058,CP035180_00077	MPF_F	NC_022609_00095,NC_019165_00034,NC_021654_00016,NC_011281_00082,NC_022609_00081,NC_014312_00128,NC_021231_00085,NC_023332_00154,NC_014312_00118,NC_014312_00116,NC_021502_00150,NC_021502_00131	-	-	conjugative	CP026212	0.0276889	Citrobacter sp. CFNIH10	AA022	-	order	Enterobacterales	order	Enterobacterales	family	Enterobacteriaceae	16940067; 20851899
KPN093:AA024	11	71663	48.9248	09157d78267fde14bb99333783697775	IncFII,rep_cluster_2183	000132__HG969996,CP017721_00179	-	-	-	-	-	-	non-mobilizable	CP026185	0.0448759	Klebsiella pneumoniae	AA024	-	family	Enterobacteriaceae	family	Enterobacteriaceae	-	-	-
KPN098:AA033	3	67888	53.0241	7a4e7f145d9443d743521b05e35e518c	IncFII,rep_cluster_2183	CP000966,CP017721_00179	MOBF,MOBF	CP035180_00077,NC_021231_00058	MPF_F	NC_014312_00116,NC_014312_00118,NC_023332_00154,NC_019389_00068,NC_014312_00128,NC_022609_00081,NC_011281_00082,NC_021654_00016,NC_019165_00034,NC_019155_00032,NC_021502_00131,NC_021502_00150	-	-	conjugative	CP024543	0.0389696	Klebsiella pneumoniae	AA033	-	genus	Klebsiella	genus	Klebsiella	-	-	-
KPN119:AA433	4	67883	57.6227	186608b646aceb461936940d163363e0	IncFII,rep_cluster_2183	000129__CP018340,CP033468_00001	-	-	MPF_F	NC_014312_00128,NC_022609_00081	-	-	non-mobilizable	CP027614	0.0129677	Klebsiella pneumoniae subsp. ozaenae	AA433	AI500	genus	Klebsiella	genus	Klebsiella	-	-	-
KPN120:AA433	4	67462	57.5761	fb44fdff6ed1666dff3cde93a00d50d0	IncFII,rep_cluster_2183	000129__CP018340,CP033468_00001	-	-	-	-	-	-	non-mobilizable	CP026717	0.0130157	Klebsiella oxytoca	AA433	AI500	genus	Klebsiella	genus	Klebsiella	-	-	-
KPN168:novel_279edfed96e82be3f44a8d0619cf5edf	3	11299	51.4293	279edfed96e82be3f44a8d0619cf5edf	IncFII,rep_cluster_2183	000132__HG969996,CP017721_00179	-	-	-	-	-	-	non-mobilizable	KJ187751	0.0829489	Klebsiella pneumoniae	novel_279edfed96e82be3f44a8d0619cf5edf	-	-	-	-	-	-	-	-
KPN172:AA448	9	86660	51.6836	fe3f9f361167216e81f87d4e9cf51974	IncFII,rep_cluster_2183	000128__CP023916,CP017721_00179	MOBF,MOBF	CP035180_00077,NC_021231_00058	MPF_F	NC_014312_00116,NC_014312_00118,NC_023332_00154,NC_019389_00068,NC_014312_00128,NC_022609_00081,NC_019389_00080,NC_021654_00016,NC_019165_00034,NC_019155_00032,NC_021502_00131,NC_021502_00150	-	-	conjugative	MK413718	0.0276889	Klebsiella pneumoniae	AA448	-	family	Enterobacteriaceae	family	Enterobacteriaceae	-	-	-
KPN40:AC435	5	34300	53.5773	69c59958815275b40a2234842b620f39	IncFII,rep_cluster_2183	000132__HG969996,CP017721_00179	MOBF,MOBF	NC_021231_00058,CP035180_00077	MPF_T	NC_021502_00150	-	-	conjugative	CP020065	0.0529154	Klebsiella pneumoniae	AC435	-	genus	Klebsiella	genus	Klebsiella	-	-	-
KPN100:AA450	17	98806	52.3865	5af565589e062d54ed6712f8f922ef52	IncFII,rep_cluster_2183,rep_cluster_1418	000128__CP023916,CP017721_00179,000759__NC_013950_00034	MOBF	CP026151_00010	MPF_F	NC_014312_00116,NC_014312_00118,NC_023332_00154,NC_021231_00085,NC_014312_00128,NC_022609_00081,NC_019389_00080,NC_021654_00016,NC_019165_00034,NC_014312_00141,NC_021502_00131	-	-	conjugative	CP044529	0.00808024	Klebsiella grimontii	AA450	AI543	family	Enterobacteriaceae	family	Enterobacteriaceae	genus	Klebsiella	16940067
KPN88:AA474	5	97648	51.1009	95c22809f699c1efff32691fc4505d92	IncI-gamma/K1	MF344577	MOBP	NC_019097	MPF_I	NC_019097_00056,NC_022267_00057,NC_019111_00038,NC_023290_00086,NC_015965_00072,NC_019097_00075,NC_022267_00069,NZ_CM001473_00069,NC_019097_00085	MOBP,MOBF	JN253636,NZ_CP016035	conjugative	MF344577	0.00645455	Klebsiella pneumoniae	AA474	AI614	order	Enterobacterales	family	Enterobacteriaceae	order	Enterobacterales	23333216; 30761100; 25987637; 21470454; 29899511; 20851899
KPN124:AA002	1	59274	51.1877	8212f2cb2d453f2dd6a738fbc7c3abcb	IncL/M	U27345	MOBP	NC_004464_00056	MPF_I	NC_004464_00105,NC_004464_00073,NC_005246_00069,NC_019154_00069,NC_004464_00068,NC_004464_00066,NC_019344_00078,NC_019063_00094,NC_005246_00057	-	-	conjugative	CP045017	0.00325637	Klebsiella pneumoniae subsp. pneumoniae	AA002	AH528	phylum	Proteobacteria	order	Enterobacterales	phylum	Proteobacteria	25933288; 22083465; 17698626; 20851899
KPN30:AA002	1	57418	51.6772	376b373831f94ff23e4e6424721cd293	IncL/M	U27345	MOBP	NC_004464_00056	MPF_I	NC_004464_00105,NC_004464_00073,NC_005246_00069,NC_019154_00069,NC_004464_00068,NC_004464_00066,NC_019344_00078,NC_019063_00094,NC_005246_00057	-	-	conjugative	CP029720	0.0083078	Enterobacter cloacae	AA002	AH528	phylum	Proteobacteria	order	Enterobacterales	phylum	Proteobacteria	25933288; 22083465; 17698626; 20851899
KPN45:AA002	2	66993	49.4514	e7cac9d9154f26196f90dbbacb06eaec	IncL/M	U27345	MOBP	NC_004464_00056	MPF_I	NC_019063_00094,NC_019344_00078,NC_004464_00066,NC_004464_00068,NC_019154_00069,NC_005246_00069,NC_004464_00073,NC_004464_00105,NC_005246_00057	-	-	conjugative	CP038457	0.00873204	Escherichia coli	AA002	AH530	phylum	Proteobacteria	order	Enterobacterales	phylum	Proteobacteria	25933288; 22083465; 17698626; 20851899
KPN168:AD158	1	29039	48.7723	d5b4e4608f3a5a48bce6cce297d56ac6	IncN	000150__JQ996149	MOBF	NC_020122_00018	MPF_T	NC_020122_00019	-	-	conjugative	CP024853	0.015616	Escherichia coli	AD158	AM605	class	Gammaproteobacteria	class	Gammaproteobacteria	order	Enterobacterales	23114770; 20851899; 28842132
KPN098:novel_0470afd25ded5e61606cf1fac7e7c930	1	18713	47.4857	0470afd25ded5e61606cf1fac7e7c930	IncR	000204__CP008701_00115	-	-	-	-	-	-	non-mobilizable	CP034132	0.0759181	Klebsiella quasipneumoniae	novel_0470afd25ded5e61606cf1fac7e7c930	-	order	Enterobacterales	order	Enterobacterales	genus	Klebsiella	23711894
KPN103:AB192	2	14684	52.6968	b39eb14a9aba795ebc68fe13779933bc	IncR	000204__CP008701_00115	-	-	-	-	-	-	non-mobilizable	LT985322	0.0315792	Escherichia coli	AB192	-	order	Enterobacterales	order	Enterobacterales	genus	Klebsiella	23711894
KPN119:AA050	8	56369	54.624	e6c94de06e9726bc1866db394ccc4f0f	IncR	000204__CP008701_00115	-	-	-	-	-	-	non-mobilizable	CP007735	0.0224204	Klebsiella pneumoniae subsp. pneumoniae KPNIH27	AA050	AH642	order	Enterobacterales	order	Enterobacterales	genus	Klebsiella	23711894
KPN124:AA029	5	66718	54.606	94dc6af1ae30cc56afb7d9e3b0e39bd7	IncR	000204__CP008701_00115	-	-	-	-	-	-	non-mobilizable	CP017935	0.00698112	Klebsiella pneumoniae	AA029	AH587	order	Enterobacterales	order	Enterobacterales	genus	Klebsiella	23711894
KPN126:AB194	1	21608	48.4589	b942a5a18c93715cf9b65e9afd0fbf84	IncR	000204__CP008701_00115	-	-	-	-	-	-	non-mobilizable	CP043514	0.0519203	Enterobacter kobei	AB194	-	order	Enterobacterales	order	Enterobacterales	genus	Klebsiella	23711894
KPN143:AB194	1	21557	48.4437	518a225b6c93a50751d7d34084be4575	IncR	000204__CP008701_00115	-	-	-	-	-	-	non-mobilizable	CP043514	0.0517248	Enterobacter kobei	AB194	-	order	Enterobacterales	order	Enterobacterales	genus	Klebsiella	23711894
KPN146:AB183	6	62253	56.0857	b45cccc99f51f68cae1e073854364b9a	IncR	000204__CP008701_00115	MOBF,MOBF	CP035180_00077,NC_021231_00058	MPF_T	NC_021502_00150	-	-	conjugative	CP000650	0.0537328	Klebsiella pneumoniae subsp. pneumoniae MGH 78578	AB183	-	order	Enterobacterales	order	Enterobacterales	genus	Klebsiella	23711894
KPN152:AA050	9	72646	50.6745	bfef0b76698f35f9ab9a460fd2c7f215	IncR	000204__CP008701_00115	-	-	-	-	-	-	non-mobilizable	CP007735	0.0236777	Klebsiella pneumoniae subsp. pneumoniae KPNIH27	AA050	AH642	order	Enterobacterales	order	Enterobacterales	genus	Klebsiella	23711894
KPN157:AB189	4	18306	48.6835	bb1402f79e2669a83f5583d898718b07	IncR	000204__CP008701_00115	-	-	-	-	-	-	non-mobilizable	CP039972	0.035622	Klebsiella pneumoniae	AB189	-	order	Enterobacterales	order	Enterobacterales	genus	Klebsiella	23711894
KPN176:AD443	7	111504	51.7031	292d3d4f25894ea48b1aff1619a033f3	IncR	000204__CP008701_00115	-	-	-	-	-	-	non-mobilizable	CP032173	0.0223484	Klebsiella pneumoniae	AD443	AN001	order	Enterobacterales	order	Enterobacterales	genus	Klebsiella	23711894
KPN28:AA029	2	59459	52.0594	a0a95076c78f209c9f48f41aa357fe9c	IncR	000204__CP008701_00115	-	-	-	-	-	-	non-mobilizable	CP017935	0.0364545	Klebsiella pneumoniae	AA029	-	order	Enterobacterales	order	Enterobacterales	genus	Klebsiella	23711894
KPN36:AB183	1	51239	54.1775	490190c7c9ee00975634781dc7f1e82d	IncR	000204__CP008701_00115	-	-	-	-	-	-	non-mobilizable	CP045019	0.0191812	Klebsiella pneumoniae subsp. pneumoniae	AB183	AJ825	order	Enterobacterales	order	Enterobacterales	genus	Klebsiella	23711894
KPN37:AA029	3	58010	54.0493	43d4448e59e2b1486c9a1b89e625c022	IncR	000204__CP008701_00115	-	-	-	-	-	-	non-mobilizable	CP017935	0.0109571	Klebsiella pneumoniae	AA029	AH587	order	Enterobacterales	order	Enterobacterales	genus	Klebsiella	23711894
KPN39:AB193	2	30298	55.5482	36d4d6c08deb9b6c70996c78729a8107	IncR	000204__CP008701_00115	-	-	-	-	MOBF	NZ_CP016035	mobilizable	CP039605	0.00470559	Salmonella enterica subsp. enterica	AB193	AJ857	order	Enterobacterales	order	Enterobacterales	genus	Klebsiella	23711894
KPN40:AA031	2	24869	54.7147	75897c3ea77bf36f71e92f15fa06da66	IncR	000207__CP025517	-	-	-	-	-	-	non-mobilizable	CP033395	0.0399018	Klebsiella pneumoniae	AA031	-	order	Enterobacterales	order	Enterobacterales	genus	Klebsiella	23711894
KPN47:AA029	4	59775	54.2434	85e8dfc0489d6d38560892a63800d15b	IncR	000204__CP008701_00115	-	-	-	-	-	-	non-mobilizable	CP017935	0.0114865	Klebsiella pneumoniae	AA029	AH587	order	Enterobacterales	order	Enterobacterales	genus	Klebsiella	23711894
KPN50:AA029	3	59208	52.1163	86ccb8ca6310a8734310493c6b635daa	IncR	000204__CP008701_00115	-	-	-	-	-	-	non-mobilizable	CP017935	0.0350415	Klebsiella pneumoniae	AA029	-	order	Enterobacterales	order	Enterobacterales	genus	Klebsiella	23711894
KPN88:AB189	4	14053	50.7507	3e831e5aa6fee5ace8423ad86a81f5f7	IncR	000204__CP008701_00115	-	-	-	-	-	-	non-mobilizable	CP039972	0.00940624	Klebsiella pneumoniae	AB189	AJ838	order	Enterobacterales	order	Enterobacterales	genus	Klebsiella	23711894
KPN157:novel_f1a8c5820f0b5c46ff6cf3705e523024	8	56771	49.7102	f1a8c5820f0b5c46ff6cf3705e523024	IncU	000212__CP012556_00176	-	-	-	-	-	-	non-mobilizable	CP023978	0.0674584	Klebsiella variicola	novel_f1a8c5820f0b5c46ff6cf3705e523024	-	phylum	Proteobacteria	class	Gammaproteobacteria	phylum	Proteobacteria	24096417; 18502921; 25389419; 30619542; 20851899
KPN095:AB531	2	56282	52.9086	813937a846f16b5a144fa04747c387bc	rep_cluster_1	000232__CP012429	-	-	-	-	-	-	non-mobilizable	CP028992	0.0114419	Klebsiella pneumoniae	AB531	AK353	family	Enterobacteriaceae	family	Enterobacteriaceae	-	-	-
KPN69:AB531	3	57469	52.9033	af120bba8af0b8c5be247db8b59e445d	rep_cluster_1	000232__CP012429	-	-	-	-	-	-	non-mobilizable	CP028992	0.0120298	Klebsiella pneumoniae	AB531	AK353	family	Enterobacteriaceae	family	Enterobacteriaceae	-	-	-
KPN70:AB531	3	57489	52.9179	d70e64ee230d2e9c6ab255a516c6ce5b	rep_cluster_1	000232__CP012429	-	-	-	-	-	-	non-mobilizable	CP028992	0.0120757	Klebsiella pneumoniae	AB531	AK353	family	Enterobacteriaceae	family	Enterobacteriaceae	-	-	-
KPN84:AB531	1	54390	53.4363	4cbfd85bfffe868b0345edab2363c8fa	rep_cluster_1	000232__CP012429	-	-	-	-	-	-	non-mobilizable	CP023421	0.015508	Klebsiella pneumoniae	AB531	AK353	family	Enterobacteriaceae	family	Enterobacteriaceae	-	-	-
KPN151:AC978	1	53210	46.6115	242e21809938df0c6e39569c87060a9c	rep_cluster_1368	000688__CP006788_00033	MOBP	NC_022650_00002	MPF_T	NC_023907_00045,NC_023907_00043,NC_023907_00079	-	-	conjugative	CP030221	0.016782	Salmonella enterica	AC978	AM373	family	Enterobacteriaceae	family	Enterobacteriaceae	-	-	-
KPN166:AC978	1	53210	46.6059	ef1f239a7ef13f6bb7314515b93e64b3	rep_cluster_1368	000688__CP006788_00033	MOBP	NC_022650_00002	MPF_T	NC_023907_00079,NC_023907_00045,NC_023907_00043	-	-	conjugative	CP030221	0.016782	Salmonella enterica	AC978	AM373	family	Enterobacteriaceae	family	Enterobacteriaceae	-	-	-
KPN104:AA434	6	52193	50.8095	19e4dc6f55173313871ed18e8839eb3e	rep_cluster_1418	000759__NC_013950_00034	-	-	MPF_F	NC_014312_00116,NC_014312_00118,NC_023332_00154	-	-	non-mobilizable	CP021753	0.020747	Klebsiella pneumoniae	AA434	AI501	family	Enterobacteriaceae	family	Enterobacteriaceae	genus	Klebsiella	16940067
KPN118:AA024	1	40710	52.6775	0a3f3ecb7d3d8d5dc7bcfbb5493d93e8	rep_cluster_1418	000759__NC_013950_00034	-	-	-	-	-	-	non-mobilizable	CP038279	0.0329357	Raoultella ornithinolytica	AA024	-	family	Enterobacteriaceae	family	Enterobacteriaceae	genus	Klebsiella	16940067
KPN119:AD548	1	11369	49.7229	a397f9b04dbed66fc2be923f25a58051	rep_cluster_1418	000759__NC_013950_00034	-	-	-	-	-	-	non-mobilizable	CP006921	0.0108702	Klebsiella pneumoniae 30684/NJST258_2	AD548	AN141	family	Enterobacteriaceae	family	Enterobacteriaceae	genus	Klebsiella	16940067
KPN120:AD548	1	12037	50.0374	2e85b802c43c806a94564f530f5ed2d2	rep_cluster_1418	000759__NC_013950_00034	-	-	-	-	-	-	non-mobilizable	CP006921	0.0120298	Klebsiella pneumoniae 30684/NJST258_2	AD548	AN141	family	Enterobacteriaceae	family	Enterobacteriaceae	genus	Klebsiella	16940067
KPN128:AA024	2	47365	56.5439	dd9dd7c7d4ff391a352f6a4f88212a90	rep_cluster_1418	000759__NC_013950_00034	-	-	-	-	-	-	non-mobilizable	CP038279	0.0315792	Raoultella ornithinolytica	AA024	-	family	Enterobacteriaceae	family	Enterobacteriaceae	genus	Klebsiella	16940067
KPN139:AA964	4	30862	49.1673	70f494d25297783fdd4aca15e1d13de2	rep_cluster_1418	000759__NC_013950_00034	-	-	-	-	-	-	non-mobilizable	KR822246	0.040724	Enterobacter hormaechei	AA964	-	family	Enterobacteriaceae	family	Enterobacteriaceae	genus	Klebsiella	16940067
KPN140:AA024	1	17307	53.6835	52a5e272552e8ceb126f4fdfe61a2c94	rep_cluster_1418	000759__NC_013950_00034	-	-	-	-	-	-	non-mobilizable	CP038279	0.0296126	Raoultella ornithinolytica	AA024	-	family	Enterobacteriaceae	family	Enterobacteriaceae	genus	Klebsiella	16940067
KPN53:AB196	1	16312	51.5694	b65aeae5ee4acb7e56cfd9e758f0afad	rep_cluster_1418	000759__NC_013950_00034	-	-	-	-	-	-	non-mobilizable	MK773538	0.0525139	Klebsiella pneumoniae	AB196	-	family	Enterobacteriaceae	family	Enterobacteriaceae	genus	Klebsiella	16940067
KPN123:AA104	1	3606	46.9495	441924a27bd56e7de1f13ef93664fae8	rep_cluster_2327	AY033516_00007	-	-	-	-	-	-	non-mobilizable	CP012489	0.0241368	Enterobacter sp. FY-07	AA104	AH722	family	Enterobacteriaceae	family	Enterobacteriaceae	-	-	-
KPN161:AA104	1	2435	48.2136	6bbba8d1f9de06d2ddeb90b39c0425e1	rep_cluster_2327	AY033516_00007	-	-	-	-	-	-	non-mobilizable	CP012489	0.0327227	Enterobacter sp. FY-07	AA104	-	family	Enterobacteriaceae	family	Enterobacteriaceae	-	-	-
KPN73:AC530	1	2149	47.2778	0ca02b5473f08ea01b9df958d09b5abe	rep_cluster_2327	AY033516_00007	-	-	-	-	-	-	non-mobilizable	CP000974	0.0567566	Escherichia coli SMS-3-5	AC530	-	family	Enterobacteriaceae	family	Enterobacteriaceae	-	-	-
KPN44:AA104	1	5504	45.9666	dadee3456bc6ad03a8ee7ced043471c0	rep_cluster_2327,rep_cluster_2373	AY033516_00007,LT985313_00005	-	-	-	-	-	-	non-mobilizable	CP012489	0.0430292	Enterobacter sp. FY-07	AA104	-	family	Enterobacteriaceae	family	Enterobacteriaceae	-	-	-
KPN100:AB043	1	2044	51.5656	26f3107916fe46e505c8efd217cf0f3c	rep_cluster_2335	KU302809_00001	-	-	-	-	MOBP	CP018223	mobilizable	CP024520	0.000656154	Klebsiella pneumoniae	AB043	AJ583	multi-phylla	Firmicutes,Proteobacteria,Actinobacteria	multi-phylla	Firmicutes,Proteobacteria,Actinobacteria	order	Enterobacterales	20008783
KPN106:AB050	1	4743	51.2545	4d8ea9faa092a3bd5a82902bf3b0e890	rep_cluster_2335	KU302809_00001	MOBP,MOBP	NC_013090_00004,NC_001848_00006	-	-	MOBP	HQ328804	mobilizable	CP019843	0.000532603	Enterobacter roggenkampii	AB050	AJ603	multi-phylla	Proteobacteria,Actinobacteria,Firmicutes	multi-phylla	Proteobacteria,Actinobacteria,Firmicutes	order	Enterobacterales	20008783
KPN141:AB040	1	2572	51.2053	6b84a8e40360dd12f9b67b59c451993c	rep_cluster_2335	KU302809_00001	-	-	-	-	MOB_unknown	NC_017722	mobilizable	CP042504	0.000119496	Enterobacter sp. E76	AB040	AJ580	multi-phylla	Proteobacteria,Actinobacteria,Firmicutes	multi-phylla	Proteobacteria,Actinobacteria,Firmicutes	order	Enterobacterales	20008783
KPN146:AA122	1	4334	43.7702	47bc6dc275d4127a6a5a7b4768725849	rep_cluster_2335	KU302809_00001	-	-	-	-	-	-	non-mobilizable	CP031797	0.00308338	Klebsiella pneumoniae	AA122	AH750	multi-phylla	Actinobacteria,Firmicutes,Proteobacteria	multi-phylla	Actinobacteria,Firmicutes,Proteobacteria	order	Enterobacterales	20008783
KPN146:AB595	1	6288	52.4809	e992ec9e0f4561a753b7d1d0a3743d05	rep_cluster_2335	KU302809_00001	-	-	-	-	MOBP	AJ001708	mobilizable	LT985316	4.76906e-05	Escherichia coli	AB595	AK439	multi-phylla	Actinobacteria,Firmicutes,Proteobacteria	multi-phylla	Actinobacteria,Firmicutes,Proteobacteria	order	Enterobacterales	20008783
KPN158:AB040	1	2572	51.2053	6b84a8e40360dd12f9b67b59c451993c	rep_cluster_2335	KU302809_00001	-	-	-	-	MOB_unknown	NC_017722	mobilizable	CP042504	0.000119496	Enterobacter sp. E76	AB040	AJ580	multi-phylla	Proteobacteria,Actinobacteria,Firmicutes	multi-phylla	Proteobacteria,Actinobacteria,Firmicutes	order	Enterobacterales	20008783
KPN161:AA122	1	4457	44.2674	9af347f1c90082dc3bc4ae4e08d21ffd	rep_cluster_2335	KU302809_00001	-	-	-	-	-	-	non-mobilizable	CP031797	0.0028554	Klebsiella pneumoniae	AA122	AH750	multi-phylla	Actinobacteria,Proteobacteria,Firmicutes	multi-phylla	Actinobacteria,Proteobacteria,Firmicutes	order	Enterobacterales	20008783
KPN123:AB071	1	1989	51.3323	faa716270737177a706d6740b6b16166	rep_cluster_2335,rep_cluster_2358	KU302809_00001,CP000974_00005	-	-	-	-	MOBP	CP008720	mobilizable	CP011651	0.0489202	Citrobacter freundii	AB071	-	family	Enterobacteriaceae	family	Enterobacteriaceae	-	-	-
KPN167:AB040	1	2512	51.5924	68301f1beac0d76957e2858d7ccef9eb	rep_cluster_2335,rep_cluster_2358	KU302809_00001,CP000974_00005	-	-	-	-	MOB_unknown	NC_017722	mobilizable	CP042504	0.000143503	Enterobacter sp. E76	AB040	AJ580	family	Enterobacteriaceae	family	Enterobacteriaceae	-	-	-
KPN139:AB036	1	2656	50.2636	00c3f2876aa207ad735a8292c10a98cc	rep_cluster_2335,rep_cluster_2373	KU302809_00001,LT985313_00005	-	-	-	-	-	-	non-mobilizable	AP019694	0.00186568	Salmonella enterica subsp. enterica serovar Senftenberg	AB036	AJ570	family	Enterobacteriaceae	family	Enterobacteriaceae	-	-	-
KPN139:AA123	1	2858	47.4458	74277fbeff7c30c1ac6f5c63cf2a6027	rep_cluster_2350,rep_cluster_2358	AY123047_00001,CP000974_00005	-	-	-	-	-	-	non-mobilizable	CP011619	0.0212923	Klebsiella pneumoniae	AA123	AH751	genus	Klebsiella	genus	Klebsiella	-	-	-
KPN121:AA130	1	3553	41.6831	55165f371b55dffb015b5c0016afa4d1	rep_cluster_2358	CP000974_00005	-	-	-	-	-	-	non-mobilizable	CP033825	0.00288374	Klebsiella sp. FDAARGOS_511	AA130	AH760	phylum	Proteobacteria	order	Enterobacterales	phylum	Proteobacteria	24096417
KPN132:AA521	1	5286	52.081	ba099c77455af441aee13792f609f3e4	rep_cluster_2358	CP000974_00005	MOBP	NC_016979_00005	-	-	MOB_unknown	CP016722	mobilizable	CP018738	0.00162709	Klebsiella pneumoniae	AA521	AI695	phylum	Proteobacteria	order	Enterobacterales	phylum	Proteobacteria	24096417
KPN139:AB045	1	3501	49.9857	f125b63378572a043d64f20a2fcc6363	rep_cluster_2358	CP041088_00001	-	-	-	-	-	-	non-mobilizable	CP011607	0.0590885	Citrobacter freundii	AB045	-	phylum	Proteobacteria	order	Enterobacterales	phylum	Proteobacteria	24096417
KPN141:novel_6b406de6ca73d62b0d9b861ac2e2f48d	1	2540	45.5118	6b406de6ca73d62b0d9b861ac2e2f48d	rep_cluster_2358	CP000974_00005	-	-	-	-	MOB_unknown	CP016722	mobilizable	CP028466	0.0628995	Escherichia coli	novel_6b406de6ca73d62b0d9b861ac2e2f48d	-	phylum	Proteobacteria	order	Enterobacterales	phylum	Proteobacteria	24096417
KPN167:AA521	1	3361	56.2333	d807dad4a314831f91caeecf3fa827b0	rep_cluster_2358	CP000974_00005	MOBP,MOBP	NC_013090_00004,CP011605_00002	-	-	MOB_unknown	CP016722	mobilizable	CP042648	0.050014	Escherichia coli	AA521	-	phylum	Proteobacteria	order	Enterobacterales	phylum	Proteobacteria	24096417
KPN174:AA129	1	4196	41.8732	b7fcc9197d72e5b9a8489c693d309759	rep_cluster_2358	CP036198_00005	-	-	-	-	-	-	non-mobilizable	CP024580	0.0084995	Klebsiella pneumoniae	AA129	AH759	phylum	Proteobacteria	order	Enterobacterales	phylum	Proteobacteria	24096417
KPN107:AA114	1	3004	46.9707	76073866b97cf396713cb3ef351bf71b	rep_cluster_2358,rep_cluster_2373	CP000974_00005,LT985313_00005	-	-	-	-	-	-	non-mobilizable	CP011643	0.000119496	Klebsiella pneumoniae	AA114	AH738	genus	Klebsiella	genus	Klebsiella	-	-	-
KPN152:AB040	1	2573	51.6518	340eb90b87d7efb426b4a9d1c5267398	rep_cluster_2358,rep_cluster_2373	CP000974_00005,LT985313_00005	-	-	-	-	MOB_unknown	NC_017722	mobilizable	CP032846	0.000191626	Enterobacter hormaechei	AB040	AJ580	family	Enterobacteriaceae	family	Enterobacteriaceae	-	-	-
KPN104:AA114	1	3010	46.8106	30b97ffef0c6bbb67194bbd37890467f	rep_cluster_2358,rep_cluster_2374	CP000974_00005,CP042625_00002	-	-	-	-	-	-	non-mobilizable	CP011643	0.000434439	Klebsiella pneumoniae	AA114	AH738	genus	Klebsiella	genus	Klebsiella	-	-	-
KPN104:AA541	2	5908	51.4387	b4caad9e0b2b9f6a703cf413ad803d0b	rep_cluster_2370	EU580135_00003	MOBP	NC_009794_00003	-	-	MOBP	NZ_CP008718	mobilizable	NC_009794	0.0010072	Citrobacter koseri ATCC BAA-895	AA541	AI727	order	Enterobacterales	order	Enterobacterales	-	-	-
KPN124:AA541	1	5761	51.3279	b6a6a43b5d59d569f431917b6a1cf328	rep_cluster_2370	EU580135_00003	MOBP	NC_009794_00003	-	-	MOBP	NZ_CP008718	mobilizable	NC_009794	0.000805673	Citrobacter koseri ATCC BAA-895	AA541	AI727	order	Enterobacterales	order	Enterobacterales	-	-	-
KPN3:AA541	2	6324	51.186	fcfcc90160a80562d8a6b7e936a4ab02	rep_cluster_2370	EU580135_00003	MOBP	NC_009794_00003	-	-	MOBP	NZ_CP008718	mobilizable	NC_009794	0.0018924	Citrobacter koseri ATCC BAA-895	AA541	AI727	order	Enterobacterales	order	Enterobacterales	-	-	-
KPN122:AA104	1	4242	46.2046	4edb822e4b9e1db72fba9e2c717cce92	rep_cluster_2373	LT985313_00005	-	-	-	-	-	-	non-mobilizable	CP012489	0.0419997	Enterobacter sp. FY-07	AA104	-	order	Enterobacterales	order	Enterobacterales	genus	Klebsiella	26169555
KPN142:AA104	1	4242	46.0632	19023615ca0316cf9fd9648e6ef0c60a	rep_cluster_2373	LT985313_00005	-	-	-	-	-	-	non-mobilizable	CP012489	0.0419997	Enterobacter sp. FY-07	AA104	-	order	Enterobacterales	order	Enterobacterales	genus	Klebsiella	26169555
KPN151:AA114	1	3010	46.9103	b32400dae6cb333acf66662bafec37d9	rep_cluster_2373	LT985313_00005	-	-	-	-	-	-	non-mobilizable	CP011643	0.000434439	Klebsiella pneumoniae	AA114	AH738	order	Enterobacterales	order	Enterobacterales	genus	Klebsiella	26169555
KPN166:AA114	1	3010	46.7442	2310f29df6b3a0a54439f7cbe54cf8ea	rep_cluster_2373	LT985313_00005	-	-	-	-	-	-	non-mobilizable	CP011643	0.000434439	Klebsiella pneumoniae	AA114	AH738	order	Enterobacterales	order	Enterobacterales	genus	Klebsiella	26169555
KPN18:AA114	1	3054	46.9548	3b099cea9dab0aa8c692d6f3f2384ad6	rep_cluster_2373	LT985313_00005	-	-	-	-	-	-	non-mobilizable	CP011643	0.000119496	Klebsiella pneumoniae	AA114	AH738	order	Enterobacterales	order	Enterobacterales	genus	Klebsiella	26169555
KPN3:AA114	1	3060	46.732	a85a50d116d2031c326b4ae819716b61	rep_cluster_2373	LT985313_00005	-	-	-	-	-	-	non-mobilizable	CP011643	0.000434439	Klebsiella pneumoniae	AA114	AH738	order	Enterobacterales	order	Enterobacterales	genus	Klebsiella	26169555
KPN73:AC431	2	10579	52.1032	7ef1358e9fc8183a563862ea1d42c9eb	rep_cluster_2373	LT985313_00005	-	-	-	-	MOB_unknown	CP016722	mobilizable	CP011626	0.0357395	Klebsiella oxytoca	AC431	-	order	Enterobacterales	order	Enterobacterales	genus	Klebsiella	26169555
KPN39:AA114	1	3004	46.6045	8dfa2c61751514bea40747f38f11e3fb	rep_cluster_2373,rep_cluster_2374	LT985313_00005,CP042625_00002	-	-	-	-	-	-	non-mobilizable	CP011643	0.000119496	Klebsiella pneumoniae	AA114	AH738	genus	Klebsiella	genus	Klebsiella	-	-	-
KPN172:novel_a809ae52cb4887a5d19ac76fc16aae9f	1	5741	48.8939	a809ae52cb4887a5d19ac76fc16aae9f	rep_cluster_2401	CP039864_00003	-	-	-	-	MOB_unknown	CP016722	mobilizable	CP024575	0.0909306	Klebsiella pneumoniae	novel_a809ae52cb4887a5d19ac76fc16aae9f	-	family	Enterobacteriaceae	family	Enterobacteriaceae	-	-	-
KPN42:novel_216828ebf055e3d829cc9ea4893ada5b	1	5792	48.9296	216828ebf055e3d829cc9ea4893ada5b	rep_cluster_2401	CP039864_00003	-	-	-	-	MOB_unknown	CP016722	mobilizable	CP024575	0.0943778	Klebsiella pneumoniae	novel_216828ebf055e3d829cc9ea4893ada5b	-	family	Enterobacteriaceae	family	Enterobacteriaceae	-	-	-
KPN43:novel_6d20ec29e891ea51a471d7a609e64528	1	5792	48.8087	6d20ec29e891ea51a471d7a609e64528	rep_cluster_2401	CP039864_00003	-	-	-	-	MOB_unknown	CP016722	mobilizable	CP024575	0.0943778	Klebsiella pneumoniae	novel_6d20ec29e891ea51a471d7a609e64528	-	family	Enterobacteriaceae	family	Enterobacteriaceae	-	-	-
KPN152:AF031	3	125700	49.743	552e594f6db5b702c3e691bdcf28ae85	rep_cluster_2469	CP032196_00054	-	-	-	-	-	-	non-mobilizable	CP039970	0.0260597	Klebsiella pneumoniae	AF031	-	genus	Klebsiella	genus	Klebsiella	-	-	-
KPN150:AB531	1	54636	52.5734	08d2e9e50a07ec6b1468dc4a91a35d08	rep_cluster_3	001607__CP009878	-	-	-	-	-	-	non-mobilizable	CP008844	0.00977265	Klebsiella michiganensis	AB531	AK351	genus	Klebsiella	genus	Klebsiella	-	-	-
KPN174:AB531	4	31069	50.1464	fa28e20038d4c7b9a26a01261da8cd12	rep_cluster_3	001607__CP009878	-	-	-	-	-	-	non-mobilizable	CP033624	0.0215695	Klebsiella pneumoniae	AB531	AK351	genus	Klebsiella	genus	Klebsiella	-	-	-
