# Supplementary material for: Genomic surveillance for multidrug-resistant or hypervirulent Klebsiella pneumoniae among United States bloodstream isolates
Source: BMC Infect Dis. 2022 Jul 7;22:603. doi: 10.1186/s12879-022-07558-1 (PMC9263067; doi:10.1186/s12879-022-07558-1)
Supplement: Supplementary file 15 — Additional file 15: Table S3. Characteristics of plasmids predicted to contain ESBL or carbapenemase genes. [file 12879_2022_7558_MOESM15_ESM.xlsx]

## Sheet: MOBTyper
Table S3. Characteristics of plasmids predicted to contain ESBL or carbapenemase genes
	sample_id	num_contigs	size	gc	md5	rep_type(s)	rep_type_accession(s)	relaxase_type(s)	relaxase_type_accession(s)	mpf_type	mpf_type_accession(s)	orit_type(s)	orit_accession(s)	predicted_mobility	mash_nearest_neighbor	mash_neighbor_distance	mash_neighbor_identification	primary_cluster_id	secondary_cluster_id	predicted_host_range_overall_rank	predicted_host_range_overall_name	observed_host_range_ncbi_rank	observed_host_range_ncbi_name	reported_host_range_lit_rank	reported_host_range_lit_name	associated_pmid(s)
	pKPN103_1	1	182519	52.8849	edf35d32184a4e44d063d523ea83c7f8	IncFIB	000107__CP014778_00094	-	-	-	-	-	-	non-mobilizable	CP023442	0.0180709	Klebsiella pneumoniae	AA275	AI074	order	Enterobacterales	order	Enterobacterales	order	Enterobacterales	11254626; 19482926; 15781495; 20851899; 16257053
	pKPN103_2	1	75648	48.1903	ccde88fe697fd627b8e705805ce35f66	IncFIA,IncFII,rep_cluster_2183	AF250878,000130__CP023489,CP017721_00179	MOBF	CP045692_00039	-	-	-	-	mobilizable	MH569712	0.00741321	Serratia marcescens subsp. marcescens	AF571	AP538	order	Enterobacterales	order	Enterobacterales	order	Enterobacterales	10773089; 25389419; 20547789; 19897651; 24247128; 20851899; 22511964
	pKPN103_3	1	62454	55.4584	9aeb401db58c6164b7a1c437e8f72039	ColRNAI_rep_cluster_1857,IncR	000003__NC_002119_00001,000204__CP008701_00115	MOBC	NC_009793_00003	-	-	MOBF	NZ_CP016035	mobilizable	LT985322	0.0243695	Escherichia coli	AB192	AJ844	order	Enterobacterales	order	Enterobacterales	genus	Klebsiella	23800906; 24777092; 23711894
	pKPN107_1	1	208317	53.0571	3fc7e51c966398f8e1915e0b8dfff63e	IncFIB,IncFII	000107__CP014778_00094,KF954760	MOBF,MOBF	NC_021231_00058,CP035180_00077	MPF_F	NC_023905_00125,NC_019165_00034,NC_021654_00016,NC_019389_00080,NC_022609_00081,NC_014312_00128,NC_021654_00004,NC_023332_00154,NC_014312_00118,NC_022609_00068,NC_014312_00116,NC_021502_00150,NC_021502_00131	-	-	conjugative	CP022574	0.0105688	Klebsiella pneumoniae	AA274	AI067	order	Enterobacterales	order	Enterobacterales	order	Enterobacterales	11254626; 19482926; 15781495; 20851899; 16257053
	pKPN107_2	1	143019	53.5132	e56228c6054288b1e185b95f49e5822f	IncFIA,IncFII,rep_cluster_2183	AF250878,000132__HG969996,CP017721_00179	MOBF,MOBF	CP035180_00077,NC_021231_00058	MPF_F	NC_014312_00116,NC_014312_00118,NC_023332_00154,NC_019389_00068,NC_014312_00128,NC_022609_00081,NC_019389_00080,NC_021654_00016,NC_019165_00034,NC_019155_00032,NC_021502_00131,NC_021502_00150	-	-	conjugative	CP011990	0.0255655	Klebsiella pneumoniae UHKPC33	AA457	AI562	order	Enterobacterales	order	Enterobacterales	order	Enterobacterales	10773089; 25389419; 20547789; 19897651; 24247128; 20851899; 22511964
	pKPN107_3	1	126445	53.133	15defd96db7013adb56ce38772843d17	IncFII,rep_cluster_1418	KF954760,000759__NC_013950_00034	MOBF,MOBF	NC_021231_00058,CP035180_00077	MPF_F	NC_023905_00125,NC_019165_00034,NC_021654_00016,NC_019389_00080,NC_022609_00081,NC_014312_00128,NC_019389_00068,NC_023332_00154,NC_014312_00118,NC_014312_00116,NC_021502_00150,NC_021502_00131	-	-	conjugative	CP021545	0.0163866	Klebsiella pneumoniae	AA434	AI501	order	Enterobacterales	order	Enterobacterales	family	Enterobacteriaceae	16940067; 20851899
	pKPN115_1	1	234056	50.2606	ae806678c9ba57f575d4da5d4a25f34d	IncFIB,IncHI1B	000107__CP014778_00094,JN420336	-	-	-	-	-	-	non-mobilizable	CP034083	0.000780658	Klebsiella pneumoniae subsp. pneumoniae	AA406	AI454	order	Enterobacterales	order	Enterobacterales	order	Enterobacterales	18606786; 11254626; 19482926; 15781495; 20851899; 16257053
	pKPN115_2	1	111909	48.9246	a1478f4900e694f2bf9ee6ec7032d1e1	IncFIB	000100__NZ_CP016161_00012	-	-	-	-	-	-	non-mobilizable	CP044030	0.00167981	Klebsiella pneumoniae	AC125	AL184	order	Enterobacterales	order	Enterobacterales	order	Enterobacterales	11254626; 19482926; 15781495; 20851899; 16257053
	pKPN132_1	1	269617	46.3724	ff315ed3950f6df94abbec3c683b07fd	IncFIB,IncHI1B,rep_cluster_1254	CP024497_00001,JN420336,000562__KT346360_00001	MOBH	NC_016980_00239	MPF_F	NC_023911_00309,NC_018107_00235,NC_016980_00109,NC_016980_00110,NC_018107_00101,NC_016980_00240,NC_016980_00099	-	-	conjugative	CP020068	0.000680979	Klebsiella pneumoniae	AA405	AI439	class	Gammaproteobacteria	class	Gammaproteobacteria	order	Enterobacterales	18606786; 11254626; 19482926; 15781495; 20851899; 16257053
	pKPN132_2	1	52895	53.0447	f30a16fcb1b669b99f71654b09e3d139	IncR	000204__CP008701_00115	-	-	-	-	MOBF	NZ_CP016035	mobilizable	CP032227	0.00928558	Klebsiella pneumoniae	AB192	AJ849	order	Enterobacterales	order	Enterobacterales	genus	Klebsiella	23711894
	pKPN132_3	1	9294	55.1861	a55f365511042727fb8b1163a58954c8	ColRNAI_rep_cluster_1857	000003__NC_002119_00001	MOBC	NC_009793_00003	-	-	-	-	mobilizable	CP032177	4.76906e-05	Klebsiella pneumoniae	AA941	AJ417	order	Enterobacterales	order	Enterobacterales	genus	Klebsiella	23800906; 24777092
	pKPN165_1	1	163942	50.0555	75d71c9f32b03555a9ad7f9453f69af0	IncFIB,IncFII	000107__CP014778_00094,MK649828_00114	MOBF,MOBF,MOBH	NC_021231_00058,CP035180_00077,NC_016980_00239	MPF_F	NC_019155_00032,NC_019165_00034,NC_021654_00016,NC_011281_00082,NC_022609_00081,NC_014312_00128,NC_019389_00068,NC_023332_00154,NC_014312_00118,NC_014312_00116,NC_021502_00150,NC_021502_00131	-	-	conjugative	FO834905	0.0128243	Klebsiella pneumoniae	AA398	AI421	order	Enterobacterales	order	Enterobacterales	order	Enterobacterales	11254626; 19482926; 15781495; 20851899; 16257053
	pKPN23_1	1	176476	50.2233	b50f6cf75667fd6488aa7a7864e095a5	IncFIB,IncFII	000107__CP014778_00094,MK649828_00114	MOBF,MOBF	NC_021231_00058,CP035180_00077	MPF_F	NC_019155_00032,NC_019165_00034,NC_021654_00016,NC_019389_00080,NC_022609_00081,NC_014312_00128,NC_019389_00068,NC_023332_00154,NC_014312_00118,NC_014312_00116,NC_021502_00150,NC_021502_00131	-	-	conjugative	CP041094	0.00294054	Klebsiella pneumoniae subsp. pneumoniae	AA454	AI557	order	Enterobacterales	order	Enterobacterales	order	Enterobacterales	11254626; 19482926; 15781495; 20851899; 16257053
	pKPN23_2	1	10060	55.0596	fefba4b50841d232394f2aa2d9bdc61e	ColRNAI_rep_cluster_1857	000003__NC_002119_00001	MOBC	NC_009793_00003	-	-	-	-	mobilizable	MK181634	9.55247e-05	Klebsiella pneumoniae	AA942	AJ424	order	Enterobacterales	order	Enterobacterales	genus	Klebsiella	23800906; 24777092
	pKPN31_1	1	269807	53.6984	13281004b41079ed7c7c04d0a182857a	IncFIB	000107__CP014778_00094	MOBF,MOBF	CP035180_00077,NC_021231_00058	MPF_F	NC_014312_00116,NC_014312_00118,NC_023332_00154,NC_021231_00085,NC_014312_00128,NC_022609_00081,NC_019389_00080,NC_021654_00016,NC_019165_00034,NC_019155_00032,NC_021502_00131,NC_021502_00150	-	-	conjugative	CP015132	0.0115761	Klebsiella pneumoniae	AA457	AI563	order	Enterobacterales	order	Enterobacterales	order	Enterobacterales	11254626; 19482926; 15781495; 20851899; 16257053
	pKPN31_2	1	8799	59.9159	4f09b9376c014e1c7030bd7c4b50caf5	-	-	-	-	-	-	-	-	non-mobilizable	CP015133	0.000981871	Klebsiella pneumoniae	AD094	AM525	genus	Klebsiella	genus	Klebsiella	-	-	-
	pKPN32_1	1	269799	53.7003	68ce56a68880c3b67a18b246779c93a3	IncFIB	000107__CP014778_00094	MOBF,MOBF	CP035180_00077,NC_021231_00058	MPF_F	NC_014312_00116,NC_014312_00118,NC_023332_00154,NC_021231_00085,NC_014312_00128,NC_022609_00081,NC_019389_00080,NC_021654_00016,NC_019165_00034,NC_019155_00032,NC_021502_00131,NC_021502_00150	-	-	conjugative	CP015132	0.0116661	Klebsiella pneumoniae	AA457	AI563	order	Enterobacterales	order	Enterobacterales	order	Enterobacterales	11254626; 19482926; 15781495; 20851899; 16257053
	pKPN32_2	1	8811	59.9251	6af569bd59e3087dea5b18a0446b1e49	-	-	-	-	-	-	-	-	non-mobilizable	CP015133	0.00105797	Klebsiella pneumoniae	AD094	AM525	genus	Klebsiella	genus	Klebsiella	-	-	-
	pKPN47_1	1	195566	53.0578	846845b8e7916eafa84e65361100d829	IncFIB,IncFII,rep_cluster_2183	000107__CP014778_00094,000132__HG969996,CP017721_00179	MOBF,MOBF	CP035180_00077,NC_021231_00058	MPF_F	NC_014312_00116,NC_014312_00118,NC_023332_00154,NC_021654_00004,NC_014312_00128,NC_022609_00081,NC_019389_00080,NC_021654_00016,NC_019165_00034,NC_019155_00032,NC_021502_00131,NC_021502_00150	-	-	conjugative	CP031583	0.00288374	Klebsiella pneumoniae	AA275	AI074	order	Enterobacterales	order	Enterobacterales	order	Enterobacterales	11254626; 20547789; 19482926; 15781495; 20851899; 16257053
	pKPN47_2	1	83251	54.7789	a4295885ec0f97c24d55fed6a359d58e	IncR	000204__CP008701_00115	-	-	-	-	-	-	non-mobilizable	CP017935	0.0023533	Klebsiella pneumoniae	AA029	AH587	order	Enterobacterales	order	Enterobacterales	genus	Klebsiella	23711894
	pKPN49_1	1	160788	49.8402	f5b9e2c732ce2a02300918c5dfe4aa38	IncFIB,IncFII,rep_cluster_2183	000107__CP014778_00094,000126__FO834904,CP017721_00179	MOBF,MOBF,MOBH	NC_021231_00058,CP035180_00077,NC_016980_00239	MPF_F	NC_019155_00032,NC_019165_00034,NC_021654_00016,NC_019389_00080,NC_022609_00081,NC_014312_00128,NC_021231_00085,NC_023332_00154,NC_014312_00118,NC_014312_00116,NC_021502_00150,NC_021502_00131	-	-	conjugative	FO834905	0.00819369	Klebsiella pneumoniae	AA398	AI421	order	Enterobacterales	order	Enterobacterales	order	Enterobacterales	11254626; 20547789; 19482926; 15781495; 20851899; 16257053
	pKPN49_2	1	95087	49.9869	82d363138a5559a7583f36cfc3767e63	IncFIA,IncFII,rep_cluster_2183	AF250878,000126__FO834904,CP017721_00179	MOBF,MOBF	CP035180_00077,NC_021231_00058	MPF_F	NC_014312_00116,NC_014312_00118,NC_023332_00154,NC_021231_00085,NC_014312_00128,NC_022609_00081,NC_019389_00080,NC_021654_00016,NC_019165_00034,NC_019155_00032,NC_021502_00131,NC_021502_00150	-	-	conjugative	FO834904	0.000167546	Klebsiella pneumoniae	AA456	AI559	order	Enterobacterales	order	Enterobacterales	order	Enterobacterales	10773089; 25389419; 20547789; 19897651; 24247128; 20851899; 22511964
	pKPN80_1	1	251499	52.5549	7c088ac3430e0c69d90821db6e4b2281	IncFIB,IncFII,rep_cluster_2183	000107__CP014778_00094,000128__CP023916,CP017721_00179	MOBF,MOBF	CP035180_00077,NC_021231_00058	MPF_T	NC_021502_00150	-	-	conjugative	CP029387	0.0239829	Klebsiella pneumoniae subsp. pneumoniae	AA275	AI077	order	Enterobacterales	order	Enterobacterales	order	Enterobacterales	11254626; 20547789; 19482926; 15781495; 20851899; 16257053
	pKPN80_2	1	86230	52.0956	cb4c9d70dcc72d9b9d0b53d2e85baf77	IncFIA,rep_cluster_2183	AF250878,CP017721_00179	-	-	-	-	-	-	non-mobilizable	CP024490	0.0161637	Klebsiella pneumoniae	AA033	AH595	order	Enterobacterales	order	Enterobacterales	order	Enterobacterales	10773089; 25389419; 20547789; 19897651; 24247128; 20851899; 22511964
	pKPN8_1	1	232936	50.0365	0488dfef10f8a2e9f22d1956dacf1c0d	IncFIB,IncHI1B	000107__CP014778_00094,JN420336	-	-	-	-	-	-	non-mobilizable	CP034083	0.000191626	Klebsiella pneumoniae subsp. pneumoniae	AA406	AI454	order	Enterobacterales	order	Enterobacterales	order	Enterobacterales	18606786; 11254626; 19482926; 15781495; 20851899; 16257053
	pKPN90_1	1	212622	54.0367	2a379df5a4160a16d9027290bcee1aa3	IncFIB,IncFII,rep_cluster_2272	000101__NZ_CP012345_00042,000129__CP018340,CP042519_00001	MOBF	MF042352_00080	MPF_F	NC_006323_00113,NC_021501_00084,NC_021501_00085,NC_006323_00105,NC_006323_00097,NC_006323_00096,NC_006323_00095,NC_021501_00096,NC_019037_00043,NC_021501_00097,NC_021501_00074,NC_009378_00101	-	-	conjugative	CP035277	0.00861543	Citrobacter freundii	AA045	AH629	order	Enterobacterales	order	Enterobacterales	order	Enterobacterales	11254626; 19482926; 15781495; 20851899; 16257053
	pKPN94_1	1	209782	51.7728	9a0d031d29453bac036ee2af699357d6	IncFIB,IncFII,rep_cluster_2183	000107__CP014778_00094,000129__CP018340,CP033468_00001	MOBF,MOBF	CP035180_00077,NC_021231_00058	MPF_F	NC_014312_00116,NC_014312_00118,NC_023332_00154,NC_019389_00068,NC_014312_00128,NC_022609_00081,NC_019389_00080,NC_021654_00016,NC_019165_00034,NC_014312_00141,NC_021502_00131,NC_021502_00150	-	-	conjugative	CP021686	0.00263042	Klebsiella pneumoniae	AA275	AI078	order	Enterobacterales	order	Enterobacterales	order	Enterobacterales	11254626; 20547789; 19482926; 15781495; 20851899; 16257053
	pKPN94_2	1	75109	53.4277	c1c3b60d24d3726e07df952f84867086	IncFIA,IncR	AF250878,000204__CP008701_00115	-	-	-	-	MOBF	NZ_CP016035	mobilizable	CP025517	0.00800497	Klebsiella pneumoniae	AB187	AJ833	order	Enterobacterales	order	Enterobacterales	order	Enterobacterales	10773089; 25389419; 19897651; 23711894; 24247128; 20851899; 22511964
	pKPN94_3	1	7835	48.2961	509f880f7310f927463887eb37458a30	ColRNAI_rep_cluster_1987,rep_cluster_2373	CP024554_00008,LT985313_00005	-	-	-	-	-	-	non-mobilizable	CP023252	0.0156702	Klebsiella pneumoniae	AA103	AH720	multi-phylla	Actinobacteria,Proteobacteria	multi-phylla	Actinobacteria,Proteobacteria	genus	Klebsiella	26169555
	pKPN96_1	1	211912	53.9134	298a4891fe39c9392463c05be43ecc04	IncFIB,IncFII,rep_cluster_2272	000101__NZ_CP012345_00042,AJ851089,CP042519_00001	MOBF	NC_021501_00073	MPF_F	NC_021501_00097,NC_006323_00096,NC_006323_00097,NC_006323_00105,NC_021501_00085,NC_021501_00084,NC_021501_00083,NC_006323_00113,NC_021501_00076,NC_009378_00101,NC_021501_00074	-	-	conjugative	CP035277	0.00427048	Citrobacter freundii	AA045	AH629	order	Enterobacterales	order	Enterobacterales	order	Enterobacterales	11254626; 19482926; 15781495; 20851899; 16257053
	pTK421_1	1	130329	52.5769	65609c8ec5127d87cb58b281649f66e8	IncFIA,IncFII,rep_cluster_2183	AF250878,CP000966,CP017721_00179	MOBF,MOBF	CP035180_00077,NC_021231_00058	MPF_F	NC_014312_00116,NC_014312_00118,NC_023332_00154,NC_021231_00085,NC_014312_00128,NC_022609_00081,NC_019389_00080,NC_021654_00016,NC_019165_00034,NC_019155_00032,NC_021502_00131,NC_021502_00150	-	-	conjugative	CP045691	0	Klebsiella pneumoniae	AA446	AI525	order	Enterobacterales	order	Enterobacterales	order	Enterobacterales	10773089; 25389419; 20547789; 19897651; 24247128; 20851899; 22511964
	pTK421_2	1	127353	49.0259	337b3ccba0e1ef064debf09f97565d19	IncFIB,IncR,rep_cluster_2183	000107__CP014778_00094,000207__CP025517,CP017721_00179	MOBF	CP045692_00039	-	-	-	-	mobilizable	CP045692	0	Klebsiella pneumoniae	AA398	AI420	order	Enterobacterales	order	Enterobacterales	order	Enterobacterales	11254626; 20547789; 19482926; 23711894; 15781495; 20851899; 16257053
	pTK421_3	1	30122	47.2578	40f9e2507706c809c3f03b4f55caf308	IncFII	000117__EU383016_00001	-	-	MPF_T	NC_010726_00014,NC_005814_00013,NC_010726_00011,NC_013284_00016	-	-	non-mobilizable	CP045693	0	Klebsiella pneumoniae	AD306	AM815	order	Enterobacterales	order	Enterobacterales	family	Enterobacteriaceae	20851899
	phvKP5_1	1	225482	50.2186	6c19234b93b536ea721ef376c0922364	IncFIB,IncHI1B	000107__CP014778_00094,JN420336	-	-	-	-	-	-	non-mobilizable	CP026012	0.00240836	Klebsiella pneumoniae	AA406	AI454	order	Enterobacterales	order	Enterobacterales	order	Enterobacterales	18606786; 11254626; 19482926; 15781495; 20851899; 16257053

## Sheet: Kleborate
Table S3. Characteristics of plasmids predicted to contain ESBL or carbapenemase genes
strain	species	species_match	contig_count	N50	largest_contig	total_size	ambiguous_bases	QC_warnings	ST	virulence_score	resistance_score	num_resistance_classes	num_resistance_genes	Yersiniabactin	YbST	Colibactin	CbST	Aerobactin	AbST	Salmochelin	SmST	RmpADC	RmST	rmpA2	wzi	K_locus	K_locus_problems	K_locus_confidence	K_locus_identity	K_locus_missing_genes	O_locus	O_type	O_locus_problems	O_locus_confidence	O_locus_identity	O_locus_missing_genes	AGly_acquired	Col_acquired	Fcyn_acquired	Flq_acquired	Gly_acquired	MLS_acquired	Phe_acquired	Rif_acquired	Sul_acquired	Tet_acquired	Tgc_acquired	Tmt_acquired	Bla_acquired
pKPN103_1	unknown		1	182519	182519	182519	no	-	NA	0	0	1	2	-	0	-	0	-	0	-	0	-	0	-	-	unknown (best match = KL106)	?-	None	0.9236	KL106_01_galF,KL106_02_cpsACP,KL106_03_wzi,KL106_04_wza,KL106_05_wzb,KL106_06_wzc,KL106_07_wzy,KL106_08,KL106_09,KL106_10_wecB,KL106_11_wzx,KL106_12,KL106_13_wzx,KL106_14,KL106_15_rfbp,KL106_16_gnd,KL106_17,KL106_18_ugd	unknown (best match = O3b)	unknown	-	None	0	O3b_01_manC,O3b_02_manB,O3b_03_wzm,O3b_04_wzt,O3b_05_wbdD,O3b_06_wbdA,O3b_07_wbdB,O3b_08_wbdC	strA.v1;strB.v1	-	-	-	-	-	-	-	-	-	-	-	-
pKPN103_2	unknown		1	75648	75648	75648	no	-	NA	0	0	0	0	-	0	-	0	-	0	-	0	-	0	-	-	unknown (best match = KL50)	-	None	0	KL50_01_galF,KL50_02_cpsACP,KL50_03_wzi,KL50_04_wza,KL50_05_wbaZ,KL50_06_wbaP,KL50_07_wcuU,KL50_08_wcuH,KL50_09_wzx,KL50_10	unknown (best match = OL102)	unknown	-	None	0	OL102_01_rfbB,OL102_02_rfbA,OL102_03_rfbD,OL102_04_rfbC,OL102_05_wbbL,OL102_06_rhamnan,OL102_07_wzm,OL102_08_wzt	-	-	-	-	-	-	-	-	-	-	-	-	-
pKPN107_2	unknown		1	143019	143019	143019	no	-	NA	0	0	4	4	-	0	-	0	-	0	-	0	-	0	-	-	unknown (best match = KL106)	?-	None	0.9242	KL106_01_galF,KL106_02_cpsACP,KL106_03_wzi,KL106_04_wza,KL106_05_wzb,KL106_06_wzc,KL106_07_wzy,KL106_08,KL106_09,KL106_10_wecB,KL106_11_wzx,KL106_12,KL106_13_wzx,KL106_14,KL106_15_rfbp,KL106_16_gnd,KL106_17,KL106_18_ugd	unknown (best match = O3b)	unknown	-	None	0	O3b_01_manC,O3b_02_manB,O3b_03_wzm,O3b_04_wzt,O3b_05_wbdD,O3b_06_wbdA,O3b_07_wbdB,O3b_08_wbdC	aph3-Ia.v1^	-	-	-	-	mphA	catA1^	-	-	-	-	dfrA14.v2*	-
pKPN115_2	unknown		1	111909	111909	111909	no	-	NA	0	0	0	0	-	0	-	0	-	0	-	0	-	0	-	-	unknown (best match = KL4)	?-	None	0.8918	KL4_01_galF,KL4_02_cpsACP,KL4_03_wcuG,KL4_04_HG290,KL4_05_HG291,KL4_06_wza,KL4_07_wzb,KL4_08_wzc,KL4_09_HG292,KL4_10_HG293,KL4_11_wzx,KL4_12_wcsW,KL4_13_HG296,KL4_14_wcuD,KL4_15_wzy,KL4_16_wcuI,KL4_17_wcuF,KL4_18_manC,KL4_19_wzi,KL4_20_wza,KL4_21_wzb,KL4_22_wzc,KL4_23_wcaJ,KL4_24_gnd	unknown (best match = OL103)	unknown	-	None	0	OL103_01_rmlC,OL103_02_wzm,OL103_03_wzt,OL103_04_hydrolase,OL103_05_spsA,OL103_06_wbbL	-	-	-	-	-	-	-	-	-	-	-	-	-
pKPN132_2	unknown		1	52895	52895	52895	no	-	NA	0	0	5	6	-	0	-	0	-	0	-	0	-	0	-	-	unknown (best match = KL4)	?-	None	0.9649	KL4_01_galF,KL4_02_cpsACP,KL4_03_wcuG,KL4_04_HG290,KL4_05_HG291,KL4_06_wza,KL4_07_wzb,KL4_08_wzc,KL4_09_HG292,KL4_10_HG293,KL4_11_wzx,KL4_12_wcsW,KL4_13_HG296,KL4_14_wcuD,KL4_15_wzy,KL4_16_wcuI,KL4_17_wcuF,KL4_18_manC,KL4_19_wzi,KL4_20_wza,KL4_21_wzb,KL4_22_wzc,KL4_23_wcaJ,KL4_24_gnd	unknown (best match = O3/O3a)	unknown	-	None	0	O3/O3a_01_manC,O3/O3a_02_manB,O3/O3a_03_wzm,O3/O3a_04_wzt,O3/O3a_05_wbdD,O3/O3a_06_wbdA,O3/O3a_07_wbdB,O3/O3a_08_wbdC	strA.v1;strB.v1	-	-	qnrB4	-	mphA	-	-	sul1	-	-	-	DHA-1
pKPN132_3	unknown		1	9294	9294	9294	no	N50	NA	0	0	0	0	-	0	-	0	-	0	-	0	-	0	-	-	unknown (best match = KL159)	-	None	0	KL159_01_galF,KL159_02_cpsACP,KL159_03_wzi,KL159_04_wza,KL159_05_wzb,KL159_06_wzc,KL159_07_wcaJ,KL159_08,KL159_09_wzx,KL159_10_wctJ,KL159_11_wzy,KL159_12,KL159_13_wctL,KL159_14,KL159_15_gnd,KL159_16_rmlB,KL159_17_rmlA,KL159_18_rmlD,KL159_19_rmlC,KL159_20_ugd	unknown (best match = OL102)	unknown	-	None	0	OL102_01_rfbB,OL102_02_rfbA,OL102_03_rfbD,OL102_04_rfbC,OL102_05_wbbL,OL102_06_rhamnan,OL102_07_wzm,OL102_08_wzt	-	-	-	-	-	-	-	-	-	-	-	-	-
pKPN23_2	unknown		1	10060	10060	10060	no	-	NA	0	0	0	0	-	0	-	0	-	0	-	0	-	0	-	-	unknown (best match = KL104)	-	None	0.8115	KL104_01_galF,KL104_02_cpsACP,KL104_03_wzi,KL104_04_wza,KL104_05_wzb,KL104_06_wzc,KL104_07,KL104_08_wzx,KL104_09_wzx,KL104_10,KL104_11,KL104_12,KL104_13,KL104_14,KL104_15_wecB,KL104_16_wzx,KL104_17,KL104_18,KL104_19_rfbp,KL104_20_gnd,KL104_21_manC,KL104_22_manB,KL104_23_ugd	unknown (best match = OL102)	unknown	-	None	0	OL102_01_rfbB,OL102_02_rfbA,OL102_03_rfbD,OL102_04_rfbC,OL102_05_wbbL,OL102_06_rhamnan,OL102_07_wzm,OL102_08_wzt	-	-	-	-	-	-	-	-	-	-	-	-	-
pKPN31_1	unknown		1	269807	269807	269807	no	-	NA	0	0	0	0	-	0	-	0	-	0	-	0	-	0	-	-	unknown (best match = KL106)	?-	None	0.9236	KL106_01_galF,KL106_02_cpsACP,KL106_03_wzi,KL106_04_wza,KL106_05_wzb,KL106_06_wzc,KL106_07_wzy,KL106_08,KL106_09,KL106_10_wecB,KL106_11_wzx,KL106_12,KL106_13_wzx,KL106_14,KL106_15_rfbp,KL106_16_gnd,KL106_17,KL106_18_ugd	unknown (best match = O3/O3a)	unknown	-	None	0	O3/O3a_01_manC,O3/O3a_02_manB,O3/O3a_03_wzm,O3/O3a_04_wzt,O3/O3a_05_wbdD,O3/O3a_06_wbdA,O3/O3a_07_wbdB,O3/O3a_08_wbdC	-	-	-	-	-	-	-	-	-	-	-	-	-
pKPN31_2	unknown		1	8799	8799	8799	no	N50	NA	0	0	0	0	-	0	-	0	-	0	-	0	-	0	-	-	unknown (best match = KL2)	-	None	0	KL2_01_galF,KL2_02_cpsACP,KL2_03_wzi,KL2_04_wza,KL2_05_wzb,KL2_06_wzc,KL2_07,KL2_08,KL2_09,KL2_10,KL2_11_wzx,KL2_12,KL2_13,KL2_14_wcaJ,KL2_15_gnd,KL2_16_manC,KL2_17_manB,KL2_18_ugd	unknown (best match = OL102)	unknown	-	None	0	OL102_01_rfbB,OL102_02_rfbA,OL102_03_rfbD,OL102_04_rfbC,OL102_05_wbbL,OL102_06_rhamnan,OL102_07_wzm,OL102_08_wzt	-	-	-	-	-	-	-	-	-	-	-	-	-
pKPN32_1	unknown		1	269799	269799	269799	no	-	NA	0	0	0	0	-	0	-	0	-	0	-	0	-	0	-	-	unknown (best match = KL106)	?-	None	0.9236	KL106_01_galF,KL106_02_cpsACP,KL106_03_wzi,KL106_04_wza,KL106_05_wzb,KL106_06_wzc,KL106_07_wzy,KL106_08,KL106_09,KL106_10_wecB,KL106_11_wzx,KL106_12,KL106_13_wzx,KL106_14,KL106_15_rfbp,KL106_16_gnd,KL106_17,KL106_18_ugd	unknown (best match = O3/O3a)	unknown	-	None	0	O3/O3a_01_manC,O3/O3a_02_manB,O3/O3a_03_wzm,O3/O3a_04_wzt,O3/O3a_05_wbdD,O3/O3a_06_wbdA,O3/O3a_07_wbdB,O3/O3a_08_wbdC	-	-	-	-	-	-	-	-	-	-	-	-	-
pKPN32_2	unknown		1	8811	8811	8811	no	N50	NA	0	0	0	0	-	0	-	0	-	0	-	0	-	0	-	-	unknown (best match = KL2)	-	None	0	KL2_01_galF,KL2_02_cpsACP,KL2_03_wzi,KL2_04_wza,KL2_05_wzb,KL2_06_wzc,KL2_07,KL2_08,KL2_09,KL2_10,KL2_11_wzx,KL2_12,KL2_13,KL2_14_wcaJ,KL2_15_gnd,KL2_16_manC,KL2_17_manB,KL2_18_ugd	unknown (best match = OL102)	unknown	-	None	0	OL102_01_rfbB,OL102_02_rfbA,OL102_03_rfbD,OL102_04_rfbC,OL102_05_wbbL,OL102_06_rhamnan,OL102_07_wzm,OL102_08_wzt	-	-	-	-	-	-	-	-	-	-	-	-	-
pKPN47_1	unknown		1	195566	195566	195566	no	-	NA	0	0	1	1	-	0	-	0	-	0	-	0	-	0	-	-	unknown (best match = KL106)	?-	None	0.9147	KL106_01_galF,KL106_02_cpsACP,KL106_03_wzi,KL106_04_wza,KL106_05_wzb,KL106_06_wzc,KL106_07_wzy,KL106_08,KL106_09,KL106_10_wecB,KL106_11_wzx,KL106_12,KL106_13_wzx,KL106_14,KL106_15_rfbp,KL106_16_gnd,KL106_17,KL106_18_ugd	unknown (best match = O3b)	unknown	-	None	0	O3b_01_manC,O3b_02_manB,O3b_03_wzm,O3b_04_wzt,O3b_05_wbdD,O3b_06_wbdA,O3b_07_wbdB,O3b_08_wbdC	-	-	-	-	-	-	-	-	-	tet(D)	-	-	-
pKPN47_2	unknown		1	83251	83251	83251	no	-	NA	0	0	3	3	-	0	-	0	-	0	-	0	-	0	-	-	unknown (best match = KL106)	-	None	0.9808	KL106_01_galF,KL106_02_cpsACP,KL106_03_wzi,KL106_04_wza,KL106_05_wzb,KL106_06_wzc,KL106_07_wzy,KL106_08,KL106_09,KL106_10_wecB,KL106_11_wzx,KL106_12,KL106_13_wzx,KL106_14,KL106_15_rfbp,KL106_16_gnd,KL106_17,KL106_18_ugd	unknown (best match = OL102)	unknown	-	None	0	OL102_01_rfbB,OL102_02_rfbA,OL102_03_rfbD,OL102_04_rfbC,OL102_05_wbbL,OL102_06_rhamnan,OL102_07_wzm,OL102_08_wzt	aadA1.v1^	-	-	-	-	-	-	-	sul1	-	-	dfrA1.v2	-
pKPN49_2	unknown		1	95087	95087	95087	no	-	NA	0	0	0	0	-	0	-	0	-	0	-	0	-	0	-	-	unknown (best match = KL51)	-	None	0.7395	KL51_01_galF,KL51_02_cpsACP,KL51_03_wzi,KL51_04_wza,KL51_05_wzb,KL51_06_wzc,KL51_07_wcaJ,KL51_08_wcpB,KL51_09_wzy,KL51_10_wcuF,KL51_11_wcpA,KL51_12_wzx,KL51_13,KL51_14_wcoZ,KL51_15_gnd,KL51_16_ugd	unknown (best match = O4)	unknown	-	None	0	O4_01_hydrolase,O4_02_hypothetical,O4_03_hypothetical,O4_04_wzt,O4_05_wzm,O4_06_glycosyltransferase	-	-	-	-	-	-	-	-	-	-	-	-	-
pKPN80_1	unknown		1	251499	251499	251499	no	-	NA	0	0	0	0	-	0	-	0	-	0	-	0	-	0	-	-	unknown (best match = KL50)	-	None	0	KL50_01_galF,KL50_02_cpsACP,KL50_03_wzi,KL50_04_wza,KL50_05_wbaZ,KL50_06_wbaP,KL50_07_wcuU,KL50_08_wcuH,KL50_09_wzx,KL50_10	unknown (best match = OL102)	unknown	-	None	0	OL102_01_rfbB,OL102_02_rfbA,OL102_03_rfbD,OL102_04_rfbC,OL102_05_wbbL,OL102_06_rhamnan,OL102_07_wzm,OL102_08_wzt	-	-	-	-	-	-	-	-	-	-	-	-	-
pKPN80_2	unknown		1	86230	86230	86230	no	-	NA	0	0	0	0	-	0	-	0	-	0	-	0	-	0	-	-	unknown (best match = KL106)	-	None	0	KL106_01_galF,KL106_02_cpsACP,KL106_03_wzi,KL106_04_wza,KL106_05_wzb,KL106_06_wzc,KL106_07_wzy,KL106_08,KL106_09,KL106_10_wecB,KL106_11_wzx,KL106_12,KL106_13_wzx,KL106_14,KL106_15_rfbp,KL106_16_gnd,KL106_17,KL106_18_ugd	unknown (best match = OL102)	unknown	-	None	0	OL102_01_rfbB,OL102_02_rfbA,OL102_03_rfbD,OL102_04_rfbC,OL102_05_wbbL,OL102_06_rhamnan,OL102_07_wzm,OL102_08_wzt	-	-	-	-	-	-	-	-	-	-	-	-	-
pKPN90_1	unknown		1	212622	212622	212622	no	-	NA	0	0	2	2	-	0	-	0	-	0	-	0	-	0	-	-	unknown (best match = KL106)	?-	None	0.9458	KL106_01_galF,KL106_02_cpsACP,KL106_03_wzi,KL106_04_wza,KL106_05_wzb,KL106_06_wzc,KL106_07_wzy,KL106_08,KL106_09,KL106_10_wecB,KL106_11_wzx,KL106_12,KL106_13_wzx,KL106_14,KL106_15_rfbp,KL106_16_gnd,KL106_17,KL106_18_ugd	unknown (best match = O3/O3a)	unknown	-	None	0	O3/O3a_01_manC,O3/O3a_02_manB,O3/O3a_03_wzm,O3/O3a_04_wzt,O3/O3a_05_wbdD,O3/O3a_06_wbdA,O3/O3a_07_wbdB,O3/O3a_08_wbdC	-	-	-	-	-	mphA*	-	-	sul1*	-	-	-	-
pKPN94_1	unknown		1	209782	209782	209782	no	-	NA	0	0	5	6	-	0	-	0	-	0	-	0	-	0	-	-	unknown (best match = KL50)	-	None	0	KL50_01_galF,KL50_02_cpsACP,KL50_03_wzi,KL50_04_wza,KL50_05_wbaZ,KL50_06_wbaP,KL50_07_wcuU,KL50_08_wcuH,KL50_09_wzx,KL50_10	unknown (best match = O3/O3a)	unknown	-	None	0	O3/O3a_01_manC,O3/O3a_02_manB,O3/O3a_03_wzm,O3/O3a_04_wzt,O3/O3a_05_wbdD,O3/O3a_06_wbdA,O3/O3a_07_wbdB,O3/O3a_08_wbdC	aadA2^;aph3-Ia.v1^	-	-	-	-	mphA	-	-	sul1	tet(A).v1	-	dfrA12	-
pKPN94_3	unknown		1	7835	7835	7835	no	N50	NA	0	0	0	0	-	0	-	0	-	0	-	0	-	0	-	-	unknown (best match = KL2)	-	None	0	KL2_01_galF,KL2_02_cpsACP,KL2_03_wzi,KL2_04_wza,KL2_05_wzb,KL2_06_wzc,KL2_07,KL2_08,KL2_09,KL2_10,KL2_11_wzx,KL2_12,KL2_13,KL2_14_wcaJ,KL2_15_gnd,KL2_16_manC,KL2_17_manB,KL2_18_ugd	unknown (best match = OL103)	unknown	-	None	0	OL103_01_rmlC,OL103_02_wzm,OL103_03_wzt,OL103_04_hydrolase,OL103_05_spsA,OL103_06_wbbL	-	-	-	-	-	-	-	-	-	-	-	-	-
pKPN96_1	unknown		1	211912	211912	211912	no	-	NA	0	0	7	9	-	0	-	0	-	0	-	0	-	0	-	-	unknown (best match = KL106)	?-	None	0.9489	KL106_01_galF,KL106_02_cpsACP,KL106_03_wzi,KL106_04_wza,KL106_05_wzb,KL106_06_wzc,KL106_07_wzy,KL106_08,KL106_09,KL106_10_wecB,KL106_11_wzx,KL106_12,KL106_13_wzx,KL106_14,KL106_15_rfbp,KL106_16_gnd,KL106_17,KL106_18_ugd	unknown (best match = O3/O3a)	unknown	-	None	0	O3/O3a_01_manC,O3/O3a_02_manB,O3/O3a_03_wzm,O3/O3a_04_wzt,O3/O3a_05_wbdD,O3/O3a_06_wbdA,O3/O3a_07_wbdB,O3/O3a_08_wbdC	aac(3)-IId^;aadA2^	-	-	-	-	mphA	catII.2*	-	sul1;sul2	tet(D)	-	dfrA12	TEM-1D.v1^
pTK421_1	unknown		1	130329	130329	130329	no	-	NA	0	0	0	0	-	0	-	0	-	0	-	0	-	0	-	-	unknown (best match = KL106)	-	None	0.94	KL106_01_galF,KL106_02_cpsACP,KL106_03_wzi,KL106_04_wza,KL106_05_wzb,KL106_06_wzc,KL106_07_wzy,KL106_08,KL106_09,KL106_10_wecB,KL106_11_wzx,KL106_12,KL106_13_wzx,KL106_14,KL106_15_rfbp,KL106_16_gnd,KL106_17,KL106_18_ugd	unknown (best match = OL102)	unknown	-	None	0	OL102_01_rfbB,OL102_02_rfbA,OL102_03_rfbD,OL102_04_rfbC,OL102_05_wbbL,OL102_06_rhamnan,OL102_07_wzm,OL102_08_wzt	-	-	-	-	-	-	-	-	-	-	-	-	-
pTK421_3	unknown		1	30122	30122	30122	no	-	NA	0	0	0	0	-	0	-	0	-	0	-	0	-	0	-	-	unknown (best match = KL102)	-	None	0	KL102_01_galF,KL102_02_cpsACP,KL102_03_wzi,KL102_04_wza,KL102_05_wzb,KL102_06_wzc,KL102_07_wbaP,KL102_08_wzy,KL102_09,KL102_10,KL102_11,KL102_12,KL102_13,KL102_14,KL102_15_wzx,KL102_16_gnd,KL102_17_ugd	unknown (best match = OL103)	unknown	-	None	0	OL103_01_rmlC,OL103_02_wzm,OL103_03_wzt,OL103_04_hydrolase,OL103_05_spsA,OL103_06_wbbL	-	-	-	-	-	-	-	-	-	-	-	-	-
pKPN103_3	unknown		1	62454	62454	62454	no	-	NA	0	1	5	8	-	0	-	0	-	0	-	0	-	0	-	-	unknown (best match = KL4)	?-	None	0.9851	KL4_01_galF,KL4_02_cpsACP,KL4_03_wcuG,KL4_04_HG290,KL4_05_HG291,KL4_06_wza,KL4_07_wzb,KL4_08_wzc,KL4_09_HG292,KL4_10_HG293,KL4_11_wzx,KL4_12_wcsW,KL4_13_HG296,KL4_14_wcuD,KL4_15_wzy,KL4_16_wcuI,KL4_17_wcuF,KL4_18_manC,KL4_19_wzi,KL4_20_wza,KL4_21_wzb,KL4_22_wzc,KL4_23_wcaJ,KL4_24_gnd	unknown (best match = O3/O3a)	unknown	-	None	0	O3/O3a_01_manC,O3/O3a_02_manB,O3/O3a_03_wzm,O3/O3a_04_wzt,O3/O3a_05_wbdD,O3/O3a_06_wbdA,O3/O3a_07_wbdB,O3/O3a_08_wbdC	aac(6')-Il;aadA25*;aadA2^	-	-	-	-	mphA	-	-	-	-	-	dfrA12	TEM-1D.v1^;TEM-1D.v1^
pKPN107_3	unknown		1	126445	126445	126445	no	-	NA	0	1	1	1	-	0	-	0	-	0	-	0	-	0	-	-	unknown (best match = KL115)	-	None	0	KL115_01_galF,KL115_02_cpsACP,KL115_03_wzi,KL115_04_wza,KL115_05_wzb,KL115_06_wzc,KL115_07_wbaP,KL115_08_wcuF,KL115_09_wcmY,KL115_10_wzy,KL115_11_wcqJ,KL115_12_wctX,KL115_13_wcuC,KL115_14_wzx,KL115_15_gnd,KL115_16_rmlB,KL115_17_rmlA,KL115_18_rmlD,KL115_19_rmlC,KL115_20_ugd	unknown (best match = OL102)	unknown	-	None	0	OL102_01_rfbB,OL102_02_rfbA,OL102_03_rfbD,OL102_04_rfbC,OL102_05_wbbL,OL102_06_rhamnan,OL102_07_wzm,OL102_08_wzt	-	-	-	-	-	-	-	-	-	-	-	-	-
pKPN94_2	unknown		1	75109	75109	75109	no	-	NA	0	1	7	13	-	0	-	0	-	0	-	0	-	0	-	-	unknown (best match = KL106)	?-	None	0.9025	KL106_01_galF,KL106_02_cpsACP,KL106_03_wzi,KL106_04_wza,KL106_05_wzb,KL106_06_wzc,KL106_07_wzy,KL106_08,KL106_09,KL106_10_wecB,KL106_11_wzx,KL106_12,KL106_13_wzx,KL106_14,KL106_15_rfbp,KL106_16_gnd,KL106_17,KL106_18_ugd	unknown (best match = O5)	unknown	-	None	0	O5_01_manC,O5_02_manB,O5_03_wzm,O5_04_wzt,O5_05_wbdD,O5_06_wbdA,O5_07_wbdB,O5_08_wbdC	aac(3)-IIa.v1^;aac(6')-Ib'.v1;aac(6')-Ib-cr.v2;aadA*;aadA*	-	-	-	-	ereA2*	CatB4.v1;cmlA5	arr-2	sul1	-	-	-	OXA-1;TEM-1D.v1^
pKPN107_1	unknown		1	208317	208317	208317	no	-	NA	0	2	4	8	-	0	-	0	-	0	-	0	-	0	-	-	unknown (best match = KL4)	?-	None	0.9602	KL4_01_galF,KL4_02_cpsACP,KL4_03_wcuG,KL4_04_HG290,KL4_05_HG291,KL4_06_wza,KL4_07_wzb,KL4_08_wzc,KL4_09_HG292,KL4_10_HG293,KL4_11_wzx,KL4_12_wcsW,KL4_13_HG296,KL4_14_wcuD,KL4_15_wzy,KL4_16_wcuI,KL4_17_wcuF,KL4_18_manC,KL4_19_wzi,KL4_20_wza,KL4_21_wzb,KL4_22_wzc,KL4_23_wcaJ,KL4_24_gnd	unknown (best match = O3b)	unknown	-	None	0	O3b_01_manC,O3b_02_manB,O3b_03_wzm,O3b_04_wzt,O3b_05_wbdD,O3b_06_wbdA,O3b_07_wbdB,O3b_08_wbdC	aac(6')-Ib'.v1*;aadA*;strA.v1^;strB.v1	-	-	-	-	-	-	-	sul2	-	-	-	OXA-9.v1;TEM-1D.v1^
pKPN132_1	unknown		1	269617	269617	269617	no	-	NA	0	2	5	9	-	0	-	0	-	0	-	0	-	0	-	-	unknown (best match = KL50)	-	None	0	KL50_01_galF,KL50_02_cpsACP,KL50_03_wzi,KL50_04_wza,KL50_05_wbaZ,KL50_06_wbaP,KL50_07_wcuU,KL50_08_wcuH,KL50_09_wzx,KL50_10	unknown (best match = O3/O3a)	unknown	-	None	0	O3/O3a_01_manC,O3/O3a_02_manB,O3/O3a_03_wzm,O3/O3a_04_wzt,O3/O3a_05_wbdD,O3/O3a_06_wbdA,O3/O3a_07_wbdB,O3/O3a_08_wbdC	aac(3)-IId^;aadA2^;aph(3')-VI;armA	-	-	-	-	mphE.v2^;msrE	-	-	sul1	-	-	dfrA12	-
pKPN115_1	unknown		1	234056	234056	234056	no	-	NA	3	0	0	0	-	0	-	0	iuc 1	1	iro 1	2	rmp 1; KpVP-1	26	rmpA2_3*-47%	-	unknown (best match = KL4)	?-	None	0.8612	KL4_01_galF,KL4_02_cpsACP,KL4_03_wcuG,KL4_04_HG290,KL4_05_HG291,KL4_06_wza,KL4_07_wzb,KL4_08_wzc,KL4_09_HG292,KL4_10_HG293,KL4_11_wzx,KL4_12_wcsW,KL4_13_HG296,KL4_14_wcuD,KL4_15_wzy,KL4_16_wcuI,KL4_17_wcuF,KL4_18_manC,KL4_19_wzi,KL4_20_wza,KL4_21_wzb,KL4_22_wzc,KL4_23_wcaJ,KL4_24_gnd	unknown (best match = O3/O3a)	unknown	-	None	0	O3/O3a_01_manC,O3/O3a_02_manB,O3/O3a_03_wzm,O3/O3a_04_wzt,O3/O3a_05_wbdD,O3/O3a_06_wbdA,O3/O3a_07_wbdB,O3/O3a_08_wbdC	-	-	-	-	-	-	-	-	-	-	-	-	-
pKPN165_1	unknown		1	163942	163942	163942	no	-	NA	3	0	0	0	-	0	-	0	iuc 2	14-1LV	iro 2 (incomplete)	3-1LV	rmp 2; KpVP-2	7	-	-	unknown (best match = KL106)	?-	None	0.9205	KL106_01_galF,KL106_02_cpsACP,KL106_03_wzi,KL106_04_wza,KL106_05_wzb,KL106_06_wzc,KL106_07_wzy,KL106_08,KL106_09,KL106_10_wecB,KL106_11_wzx,KL106_12,KL106_13_wzx,KL106_14,KL106_15_rfbp,KL106_16_gnd,KL106_17,KL106_18_ugd	unknown (best match = O3b)	unknown	-	None	0	O3b_01_manC,O3b_02_manB,O3b_03_wzm,O3b_04_wzt,O3b_05_wbdD,O3b_06_wbdA,O3b_07_wbdB,O3b_08_wbdC	-	-	-	-	-	-	-	-	-	-	-	-	-
pKPN23_1	unknown		1	176476	176476	176476	no	-	NA	3	0	1	1	-	0	-	0	iuc 3	13-2LV	-	0	-	0	-	-	unknown (best match = KL50)	-	None	0	KL50_01_galF,KL50_02_cpsACP,KL50_03_wzi,KL50_04_wza,KL50_05_wbaZ,KL50_06_wbaP,KL50_07_wcuU,KL50_08_wcuH,KL50_09_wzx,KL50_10	unknown (best match = O3/O3a)	unknown	-	None	0	O3/O3a_01_manC,O3/O3a_02_manB,O3/O3a_03_wzm,O3/O3a_04_wzt,O3/O3a_05_wbdD,O3/O3a_06_wbdA,O3/O3a_07_wbdB,O3/O3a_08_wbdC	-	-	-	-	-	-	-	-	-	tet(A).v1	-	-	-
pKPN49_1	unknown		1	160788	160788	160788	no	-	NA	3	0	0	0	-	0	-	0	iuc 2	6	iro 2	22-1LV	rmp 2; KpVP-2	2	-	-	unknown (best match = KL107)	-	None	0	KL107_01_galF,KL107_02_cpsACP,KL107_03_wzi,KL107_04_wza,KL107_05_wzb,KL107_06_wzc,KL107_07_wbaP,KL107_08,KL107_09,KL107_10,KL107_11_gnd,KL107_12,KL107_13,KL107_14,KL107_15,KL107_16_ugd	unknown (best match = O3/O3a)	unknown	-	None	0	O3/O3a_01_manC,O3/O3a_02_manB,O3/O3a_03_wzm,O3/O3a_04_wzt,O3/O3a_05_wbdD,O3/O3a_06_wbdA,O3/O3a_07_wbdB,O3/O3a_08_wbdC	-	-	-	-	-	-	-	-	-	-	-	-	-
pKPN8_1	unknown		1	232936	232936	232936	no	-	NA	3	0	0	0	-	0	-	0	iuc 1	1	iro 1	2	rmp 1; KpVP-1	26	rmpA2_8*-59%	-	unknown (best match = KL4)	?-	None	0.8646	KL4_01_galF,KL4_02_cpsACP,KL4_03_wcuG,KL4_04_HG290,KL4_05_HG291,KL4_06_wza,KL4_07_wzb,KL4_08_wzc,KL4_09_HG292,KL4_10_HG293,KL4_11_wzx,KL4_12_wcsW,KL4_13_HG296,KL4_14_wcuD,KL4_15_wzy,KL4_16_wcuI,KL4_17_wcuF,KL4_18_manC,KL4_19_wzi,KL4_20_wza,KL4_21_wzb,KL4_22_wzc,KL4_23_wcaJ,KL4_24_gnd	unknown (best match = O3/O3a)	unknown	-	None	0	O3/O3a_01_manC,O3/O3a_02_manB,O3/O3a_03_wzm,O3/O3a_04_wzt,O3/O3a_05_wbdD,O3/O3a_06_wbdA,O3/O3a_07_wbdB,O3/O3a_08_wbdC	-	-	-	-	-	-	-	-	-	-	-	-	-
pTK421_2	unknown		1	127353	127353	127353	no	-	NA	3	0	0	0	-	0	-	0	iuc 2A	29-2LV	iro unknown	0	rmp unknown	0	-	-	unknown (best match = KL106)	?-	None	0.9521	KL106_01_galF,KL106_02_cpsACP,KL106_03_wzi,KL106_04_wza,KL106_05_wzb,KL106_06_wzc,KL106_07_wzy,KL106_08,KL106_09,KL106_10_wecB,KL106_11_wzx,KL106_12,KL106_13_wzx,KL106_14,KL106_15_rfbp,KL106_16_gnd,KL106_17,KL106_18_ugd	unknown (best match = OL102)	unknown	-	None	0	OL102_01_rfbB,OL102_02_rfbA,OL102_03_rfbD,OL102_04_rfbC,OL102_05_wbbL,OL102_06_rhamnan,OL102_07_wzm,OL102_08_wzt	-	-	-	-	-	-	-	-	-	-	-	-	-
phvKP5_1	unknown		1	225482	225482	225482	no	-	NA	3	0	0	0	-	0	-	0	iuc 1	1	iro 1	2	rmp 1; KpVP-1	26-1LV	rmpA2_8*-65%	-	unknown (best match = KL4)	?-	None	0.8948	KL4_01_galF,KL4_02_cpsACP,KL4_03_wcuG,KL4_04_HG290,KL4_05_HG291,KL4_06_wza,KL4_07_wzb,KL4_08_wzc,KL4_09_HG292,KL4_10_HG293,KL4_11_wzx,KL4_12_wcsW,KL4_13_HG296,KL4_14_wcuD,KL4_15_wzy,KL4_16_wcuI,KL4_17_wcuF,KL4_18_manC,KL4_19_wzi,KL4_20_wza,KL4_21_wzb,KL4_22_wzc,KL4_23_wcaJ,KL4_24_gnd	unknown (best match = O3/O3a)	unknown	-	None	0	O3/O3a_01_manC,O3/O3a_02_manB,O3/O3a_03_wzm,O3/O3a_04_wzt,O3/O3a_05_wbdD,O3/O3a_06_wbdA,O3/O3a_07_wbdB,O3/O3a_08_wbdC	-	-	-	-	-	-	-	-	-	-	-	-	-
[truncated: 58 more columns]
