# Supplementary material for: Genomic surveillance for multidrug-resistant or hypervirulent Klebsiella pneumoniae among United States bloodstream isolates
Source: BMC Infect Dis. 2022 Jul 7;22:603. doi: 10.1186/s12879-022-07558-1 (PMC9263067; doi:10.1186/s12879-022-07558-1)
Supplement: Supplementary file 18 — Additional file 18: Table S6. Complete genomes from this study. [file 12879_2022_7558_MOESM18_ESM.xlsx]

## Sheet: Sheet1
Table S6. Complete genomes from this study
Strain	Accession #	#seq_name	length	cov.	circ.	repeat	mult.	alt_group	graph_path	Plasmid Replicon
KPN49	SAMN24039391	KPN49	5413861	16	Y	N	1	*	2	-
		pKPN49_1	160715	18	Y	N	1	*	1	IncFIB(K)
		pKPN49_2	95058	13	Y	N	1	*	3	IncFIA(HI1)
KPN8	SAMN24039390	KPN8	5356344	229	Y	N	1	*	1	-
		pKPN8_1	232618	404	Y	N	2	*	2	repB, IncHI1B(pNDM-MAR)
KPN23	SAMN24039392	KPN23	5367618	170	Y	N	1	*	1	-
		pKPN23_1	176239	286	Y	N	2	*	3	IncFIB(K), IncFII(pKP91)
		pKPN23_2	10045	115	Y	N	1	*	2	ColRNAI
KPN115	SAMN24039393	KPN115	5151820	199	Y	N	1	*	1	-
		pKPN115_1	233738	312	Y	N	2	*	3	repB, IncHI1B(pNDM-MAR)
		pKPN115_2	111806	419	Y	Y	2	*	2	IncFIB(pKPHS1)
KPN165	SAMN24039394	KPN165	5287012	207	Y	N	1	*	1	-
		pKPN165_1	163707	326	Y	N	2	*	2	IncFIB(K)
KPN103	SAMN28448989	KPN103		37	Y	N	1	*	2	-
		pKPN103_1	182519	33	Y	N	1	*	3	IncFIB
		pKPN103_2	75648	40	Y	N	1	*	4	IncFIA,IncFII,rep_cluster_2183
		pKPN103_3	62454	126	Y	Y	3	*	5	ColRNAI_rep_cluster_1857,IncR
KPN94	SAMN28448990	KPN94		13	Y	N	1	*	1	-
		pKPN94_1	209782	25	Y	N	2	*	3	IncFIB,IncFII,rep_cluster_2183
		pKPN94_2	75109	24	Y	Y	2	*	2	IncFIA,IncR
		pKPN94_3	7835	16	Y	N	1	*	4	ColRNAI_rep_cluster_1987,rep_cluster_2373
KPN107	SAMN28448991	KPN107		46	Y	N	1	*	4	-
		pKPN107_1	208317	67	Y	N	1	*	3	IncFIB,IncFII
		pKPN107_2	143019	62	Y	N	1	*	2	IncFIA,IncFII,rep_cluster_2183
		pKPN107_3	126445	69	Y	N	1	*	1	IncFII,rep_cluster_1418
KPN132	SAMN28448992	KPN132		49	Y	N	1	*	2	-
		pKPN132_1	269617	53	Y	N	1	*	3	IncFIB,IncHI1B,rep_cluster_1254
		pKPN132_2	52895	51	Y	N	1	*	4	IncR
		pKPN132_3	9294	17	Y	N	1	*	1	ColRNAI_rep_cluster_1857
