# Supplementary material for: Genomic surveillance for multidrug-resistant or hypervirulent Klebsiella pneumoniae among United States bloodstream isolates
Source: BMC Infect Dis. 2022 Jul 7;22:603. doi: 10.1186/s12879-022-07558-1 (PMC9263067; doi:10.1186/s12879-022-07558-1)
Supplement: Supplementary file 19 — Additional file 19: Table S7. Reference genomes. [file 12879_2022_7558_MOESM19_ESM.xlsx]

## Sheet: Sheet1
Table S7. Reference genomes
Strain	Accession #	#seq_name
NTUH-K2044	NC_012731.1	chromosome
	NC_006625.1	pK2044
KP52.145	NZ_FO834906.1	chromosome
	NZ_FO834904.1	plasmid 1
	NZ_FO834905.1	plasmid 2
KPPR1	GCF_000755605.1	KPPR1
SB5881	NZ_LR792628.1	chromosome
	NZ_LR792630.1	plsmid 1
	NZ_LR792629.1	plasmid 2
	NZ_LR792631.1	plasmid 3
K180005	SAMN16809114	18-0005
NCTC9494	GCA_900452185.1	chromosome
RJF999	NZ_CP014010.1	plsmid 1
	NZ_CP014011.1	plasmid 2
ED2	NZ_CP016813.1	ED2
